# Supplementary material
Source: PubMed Central journal article supplement (PMC5262430)

## Table of Contents:

|                                                                     |       |
|---------------------------------------------------------------------|-------|
| General Procedures.....                                             | SI-2  |
| Chloro-carveol <b>5</b> .....                                       | SI-3  |
| Silyl ether <b>6</b> .....                                          | SI-4  |
| Aldehyde <b>7</b> .....                                             | SI-5  |
| Allyl bromide <b>8</b> .....                                        | SI-6  |
| Homoallylic alcohol <b>9</b> .....                                  | SI-7  |
| Triethyl silyl aldehyde <b>10</b> .....                             | SI-9  |
| Unsaturated trans-lactone <b>11</b> .....                           | SI-10 |
| Cyclooctane <b>14</b> .....                                         | SI-11 |
| Table 1. Investigation of metal-mediated Allylation conditions..... | SI-12 |
| Cycloheptanol methyl ester <b>15</b> .....                          | SI-12 |
| Mono-reduction product <b>12</b> .....                              | SI-14 |
| Methyl lactone <b>13</b> .....                                      | SI-15 |
| Double-reduction product <b>SI-11</b> .....                         | SI-16 |
| Diol <b>SI-12</b> .....                                             | SI-17 |
| Mikanokryptin ( <b>1</b> ).....                                     | SI-18 |
| Deoxygenation of mikanokryptin.....                                 | SI-20 |
| X-Ray crystallographic analysis of ent- <b>Desilylated 11</b> ..... | SI-21 |
| X-Ray crystallographic analysis of <i>ent-1</i> .....               | SI-28 |
| NMR spectra.....                                                    | SI-35 |

## General Procedures

Unless otherwise stated, all reactions were performed in oven-dried or flame-dried glassware under an atmosphere of dry nitrogen or argon. Dry tetrahydrofuran (THF), *N,N*-dimethylformamide (DMF), dichloromethane (DCM), toluene, hexane, acetonitrile, and diethyl ether were obtained by passing these previously degassed solvents through activated alumina columns. Dry acetone was purchased from Fisher Chemical in Acroseal<sup>TM</sup> bottles. Amine and alcohol reagents and solvents were distilled from calcium hydride prior to use. L-carvone, D-carvone, 2,2-dimethoxyacetaldehyde (60% in H<sub>2</sub>O), and methyl acrylate was purchased from Sigma-Aldrich and used directly without further purification. Reactions were monitored by thin layer chromatography (TLC) on Silicycle Siliaplate<sup>TM</sup> TLC G Glass-Backed Special for KMnO<sub>4</sub> (TLC-R10014BK-323, 250 μm thickness, F-254 indicator) and visualized by UV irradiation and staining with *p*-anisaldehyde, phosphomolybdic acid, or potassium permanganate developing agents. Volatile solvents were removed under reduced pressure using a rotary evaporator. Flash column chromatography was performed using Silicycle F60 silica gel (60Å, 230-400 mesh, 40-63 μm). Ethyl acetate and hexanes were purchased from Fisher Chemical and used for chromatography without further purification. Proton nuclear magnetic resonance (<sup>1</sup>H NMR) and carbon nuclear magnetic resonance (<sup>13</sup>C NMR) spectra were recorded on Bruker AVQ-400, AV-500, or AV-600 spectrometers operating at 400, 500, and 600 MHz for <sup>1</sup>H, and 100, 125, and 150 MHz for <sup>13</sup>C. Chemical shifts are reported in parts per million (ppm) with respect to the residual solvent signal CDCl<sub>3</sub> (<sup>1</sup>H NMR: δ = 7.26; <sup>13</sup>C NMR: δ = 77.16) or DMSO-*d*<sub>6</sub> (<sup>1</sup>H NMR: δ = 2.50; <sup>13</sup>C NMR: δ = 39.52). Peak multiplicities are reported as follows: s = singlet, d = doublet, t = triplet, q = quartet, p = pentet, dd = doublet of doublets, td = triplet of doublets, dt = doublet of triplets, ddd = doublet of doublet of doublets, ddt = doublet of doublet of triplets, ddq = doublet of doublet of quartets, dddd = doublet of doublet of doublet of doublets, m = multiplet, br = broad signal, app = apparent. Melting points were determined using MEI-TEMP<sup>TM</sup> apparatus and are uncorrected. IR spectra were recorded on a Nicolet 380 FT-IR spectrometer. High-resolution mass spectra (HRMS) were obtained by the QB3/chemistry mass spectrometry facility at the University of California, Berkeley. Optical rotations were measured on a Perkin-Elmer 241 polarimeter. X-ray crystallographic analyses were performed at the UC-Berkeley College of Chemistry X-ray crystallography facility. All X-ray structures shown were obtained during preliminary studies conducted with (–)-carvone.

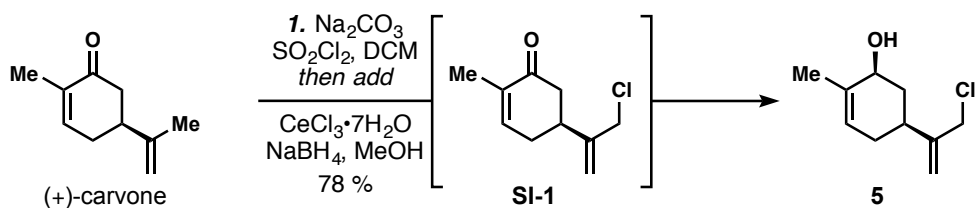

**Chloro-carveol 5:** An oven-dried 3 L three-necked flask equipped with a large stir bar was charged with D-carvone (30.0 g, 0.200 mol), sodium carbonate (63.6 g, 0.600 mol), and DCM (1 L). The resulting mixture was stirred vigorously at room temperature for 30 minutes, followed by slow addition of  $\text{SO}_2\text{Cl}_2$  (20.0 mL, 0.247 mol) over 2 hours via a syringe pump. The reaction was monitored by TLC (EtOAc:hexane 1:4) and additional  $\text{SO}_2\text{Cl}_2$  was added if necessary. After complete consumption of the starting material, methanol (1 L) and  $\text{CeCl}_3 \cdot 7\text{H}_2\text{O}$  (82.0 g, 0.220 mol) were added and the resulting mixture was stirred at room temperature for 30 minutes. The reaction was then cooled to 0 °C and  $\text{NaBH}_4$  (22.8 g, 0.600 mol) was added in 4 portions over 1 hour. After the ketone intermediate **SI-1** was completely consumed as indicated by TLC, the reaction was quenched by addition of 1N aqueous HCl (300 mL) and  $\text{H}_2\text{O}$  (500 mL) sequentially. The aqueous layer was extracted with ethyl acetate (700 mL  $\times$  3). The combined organic layer was washed with brine, dried over  $\text{MgSO}_4$ , and concentrated *in vacuo*. The resulting crude was purified by column chromatography (EtOAc:hexane = 1:10 to 1:5), affording chloro-carveol **5** (29.2 g, 0.156 mol, 78%) as a light yellow oil:  $[\alpha]_{\text{D}}^{20} = +37.4^\circ$  (c 0.01 g/mL,  $\text{CHCl}_3$ );  $^1\text{H}$  NMR (600 MHz,  $\text{CDCl}_3$ )  $\delta$  5.53 – 5.49 (m, 1H), 5.19 (s, 1H), 5.03 (s, 1H), 4.27 – 4.21 (m, 1H), 4.11 (s, 2H), 2.55 (ddd,  $J = 15.5, 8.0, 3.5$  Hz, 1H), 2.24 (ddt,  $J = 12.2, 5.6, 2.3$  Hz, 1H), 2.19 (dddd,  $J = 13.9, 6.9, 3.4, 1.6$  Hz, 1H), 1.95 (ddq,  $J = 16.6, 10.8, 2.7$  Hz, 1H), 1.77 (dd,  $J = 2.8, 1.5$  Hz, 3H), 1.53 (td,  $J = 12.2, 9.6$  Hz, 1H);  $^{13}\text{C}$  NMR (125 MHz,  $\text{CDCl}_3$ )  $\delta$  148.6, 136.4, 123.6, 113.9, 70.9, 47.6, 38.1, 36.9, 31.5, 19.0; IR (thin film,  $\text{cm}^{-1}$ ) 3324, 2969, 2942, 2916, 2884, 2838, 1716, 1642, 1451, 1434, 1407, 1258; HRMS (EI+) calcd. for  $[\text{C}_{10}\text{H}_{15}\text{ClO}]$ : m/z 186.0811, found 186.0810.

[Note: This compound is somewhat volatile and should not be placed under high vacuum for extended periods. On a 1-mmol scale, an 85% yield of product was obtained.]

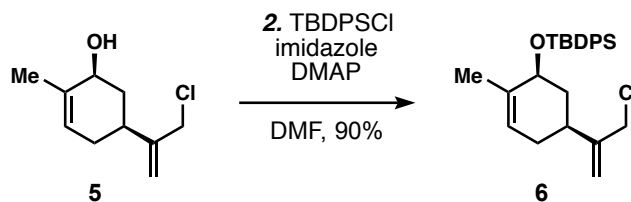

**Silyl ether 6:** An oven-dried 1 L round-bottom flask was charged with a stir bar, chloro-carveol **5** (18.6 g, 0.100 mol), imidazole (20.4 g, 0.300 mol), and 4-dimethylaminopyridine (0.6 g, 0.005 mol). The flask was placed under vacuum and back-filled with N<sub>2</sub>, followed by addition of dry DMF (500 mL). The resulting mixture was cooled to 0 °C, and TBDPSCI (32.8 g, 0.120 mol) was added slowly. The reaction was allowed to warm to room temperature and stirred overnight. After the reaction was complete as indicated by TLC, the reaction mixture was poured into a separation funnel charged with aqueous LiCl (10% w/w, 1 L). The aqueous layer was extracted with diethyl ether (500 mL × 3) and the combined organic phase was washed with H<sub>2</sub>O (500 mL × 2), brine (500 mL), dried over MgSO<sub>4</sub>, and concentrated *in vacuo*. The crude was purified by flash column chromatography (EtOAc:hexane = 1:100 to 1:30), affording silyl ether **6** (38.5 g, 0.0906 mol, 91%) as a colorless oil:  $[\alpha]_{\text{D}}^{20} = +58.0^{\circ}$  (c 0.01 g/mL, CHCl<sub>3</sub>); <sup>1</sup>H NMR (600 MHz, CDCl<sub>3</sub>) δ 7.75 – 7.69 (m, 4H), 7.45 – 7.40 (m, 2H), 7.40 – 7.35 (m, 4H), 5.43 (dq, *J* = 5.4, 1.7 Hz, 1H), 5.04 (s, 1H), 4.80 (s, 1H), 4.33 (br s, 1H), 3.92 (dd, *J* = 11.8, 1.0 Hz, 1H), 3.85 (dd, *J* = 11.8, 1.0 Hz, 1H), 2.29 – 2.20 (m, 1H), 2.06 (dddd, *J* = 16.9, 5.1, 3.0, 1.7 Hz, 1H), 1.88 (dddd, *J* = 14.4, 11.7, 5.4, 3.0 Hz, 1H), 1.83 (ddt, *J* = 12.5, 5.8, 2.3 Hz, 1H), 1.74 (dt, *J* = 2.6, 1.3 Hz, 3H), 1.48 (td, *J* = 12.5, 10.0 Hz, 1H), 1.08 (s, 9H); <sup>13</sup>C NMR (150 MHz, CDCl<sub>3</sub>) δ 148.6, 137.7, 136.2, 136.2, 135.0, 134.0, 129.8, 129.7, 127.7, 127.5, 122.9, 113.4, 72.8, 47.3, 38.3, 36.2, 31.3, 27.3, 20.2, 19.7; IR (thin film, cm<sup>-1</sup>) 3072, 3049, 2999, 2963, 2930, 2889, 2857, 1472, 1449, 1428; HRMS (EI+) calcd. for [C<sub>26</sub>H<sub>33</sub>ClOSi]: *m/z* 424.1989, found 424.1990.

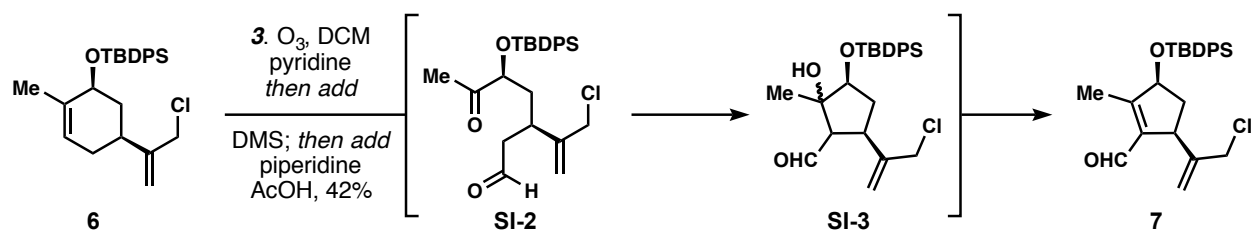

**Aldehyde 7:** An oven-dried 1 L round-bottom flask equipped with a large stir bar was charged with silyl ether **6** (21.3 g, 50.1 mmol), pyridine (1.18 mL, 15.0 mmol), and DCM (500 mL). The reaction flask was connected to a Welsbach ozone generator through plastic tubing and a glass bubbler, and cooled to -78 °C over an acetone-dry ice bath. The system was purged with O<sub>2</sub> for 5 min, and ozone generation was initiated (5~6 psi, 1.6~1.8 L/min, 90 V). The reaction was monitored carefully by TLC (EtOAc:hexane 1:30), and disconnected from the ozone generator immediately after complete consumption of the starting material (20~40 min). The reaction was then bubbled with N<sub>2</sub> for 10 min, followed by the addition of dimethyl sulfide (7.35 mL, 100 mmol). The reaction was allowed to warm up to room temperature gradually and stirred for 8 hours. Piperidine (0.74 mL, 7.6 mmol) and acetic acid (0.58 mL, 10 mmol) were added to the reaction, which was heated at reflux for 16 hours. After complete conversion of the intermediates, the reaction mixture was filtered through a short column of silica gel (washed with DCM), concentrated *in vacuo*, and purified by flash column chromatography (EtOAc:hexane 1:30) to afford aldehyde **7** (9.16 g, 20.9 mmol, 42%) as a colorless oil:  $[\alpha]_D^{20} = +12.3^\circ$  (c 0.01 g/mL, CHCl<sub>3</sub>); <sup>1</sup>H NMR (600 MHz, CDCl<sub>3</sub>) δ 9.92 (s, 1H), 7.73 – 7.63 (m, 4H), 7.48 – 7.43 (m, 2H), 7.43 – 7.37 (m, 4H), 5.22 (s, 1H), 5.06 (s, 1H), 4.67 (ddt, *J* = 7.8, 5.5, 1.0 Hz, 1H), 4.23 (dd, *J* = 11.8, 1.2 Hz, 1H), 4.09 (dd, *J* = 11.8, 0.9 Hz, 1H), 3.36 (ddd, *J* = 8.4, 6.0, 2.1 Hz, 1H), 2.36 (ddd, *J* = 13.6, 8.4, 7.8 Hz, 1H), 2.03 (dd, *J* = 2.1, 1.0 Hz, 3H), 1.69 (ddd, *J* = 13.6, 6.0, 5.5 Hz, 1H), 1.10 (s, 9H); <sup>13</sup>C NMR (150 MHz, CDCl<sub>3</sub>) δ 189.1, 161.7, 148.2, 139.1, 136.2, 136.1, 133.7, 133.6, 130.1, 130.0, 127.9, 127.8, 115.3, 80.5, 48.4, 44.9, 41.2, 27.1, 19.4, 12.3; IR (thin film, cm<sup>-1</sup>) 3072, 3050, 2960, 2931, 2892, 2857, 1725, 1674, 1472, 1428; HRMS (EI+) calcd. for [C<sub>26</sub>H<sub>31</sub>ClO<sub>2</sub>Si]: *m/z* 438.1782, found 438.1779.

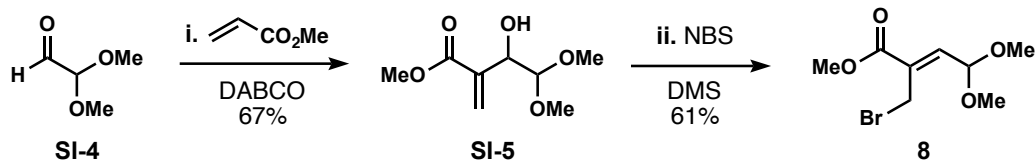

**Allyl bromide 8:** This procedure was adapted from previous conditions reported by Hoffmann and co-workers.<sup>1</sup> (i) A 250 mL round-bottom flask equipped with a stir bar was charged with 2,2-dimethoxyacetaldehyde **SI-4** (70.0 g, 60% in H<sub>2</sub>O, 0.400 mol), methyl acrylate (72.4 mL, 0.800 mol), and DABCO (44.0 g, 0.200 mol). The resulting mixture was stirred at room temperature for 2 days and concentrated *in vacuo*. The resulting oil was diluted with diethyl ether (500 mL) and washed with 1N HCl (300 mL), H<sub>2</sub>O (300 mL), and brine (300 mL) sequentially. The organic phase was dried over Na<sub>2</sub>SO<sub>4</sub> and concentrated *in vacuo*. The crude was purified by flash column chromatography (EtOAc:hexane 1:10 – 1:3), affording allyl alcohol **SI-5** (51.0 g, 0.268 mol, 67%) as a colorless oil, spectra data of which was in agreement with that previously reported by Myers and coworkers.<sup>2</sup>

(ii) A flame-dried 500 mL round-bottom flask was charged with a stir bar, *N*-Bromosuccinimide (22.0 g, 0.124 mol) and DCM (250 mL). The reaction was cooled to 0 °C, followed by the addition of dimethyl sulfide (10.0 mL, 0.139 mol) in DCM (75 mL). The resulting mixture was stirred at 0 °C for 20 min, and allyl alcohol **SI-5** (20.0 g, 0.105 mol) in DCM (75 mL) was added slowly. The reaction was allowed to warm to room temperature gradually and stirred overnight. After the reaction was complete as indicated by TLC (EtOAc:hexane 1:5), the reaction was quenched by the addition of sat. aqueous NaHCO<sub>3</sub> (200 mL). The aqueous phase was extracted with diethyl ether (200 mL × 2). The combined organic phase was washed with H<sub>2</sub>O (300 mL) and brine (300 mL) sequentially, dried over Na<sub>2</sub>SO<sub>4</sub>, and concentrated *in vacuo*. The crude material was purified by flash column chromatography (EtOAc:hexane 1:15 – 1:5), affording allyl bromide **8** (16.1 g, 0.0636 mol, 61%) as a colorless oil: <sup>1</sup>H NMR (600 MHz, CDCl<sub>3</sub>) δ 6.76 (d, *J* = 5.5 Hz, 1H), 5.20 (d, *J* = 5.5 Hz, 1H), 4.30 (s, 2H), 3.82 (s, 3H), 3.36 (s, 6H); <sup>13</sup>C NMR (150 MHz, CDCl<sub>3</sub>) δ 165.7, 141.1, 133.0, 99.0, 52.9, 52.9, 52.6, 23.5; IR (thin film, cm<sup>-1</sup>) 2997, 2955, 2907, 2832, 1722, 1654, 1438, 1371, 1329; HRMS (ESI) calcd. for [C<sub>8</sub>H<sub>13</sub><sup>79</sup>BrNaO<sub>4</sub>]<sup>+</sup> (M+Na)<sup>+</sup>: *m/z* 274.9895, found 274.9895, calcd. for [C<sub>8</sub>H<sub>13</sub><sup>81</sup>BrNaO<sub>4</sub>]<sup>+</sup> (M+Na)<sup>+</sup>: 276.9874, found 276.9877.

<sup>1</sup> H. Martin, R. Hoffmann, J. Rabe, *J. Org. Chem.* **1985**, *50*, 3849.

<sup>2</sup> J. Svenda, A. G. Myers, *Org. Lett.* **2009**, *11*, 2437.

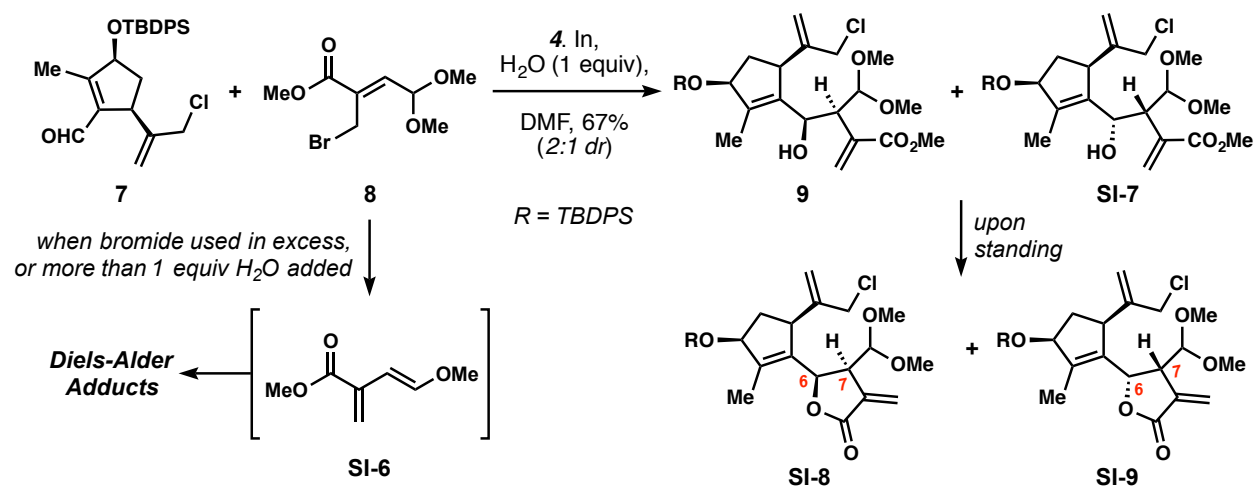

**Homoallylic Alcohol 9:** A flame-dried 500 mL round-bottom flask equipped with a stir bar was charged with aldehyde **7** (14.0 g, 31.9 mmol), allyl bromide **8** (6.73 g, 26.6 mmol), and indium shot (4.58 g, 39.9 mmol). The flask was placed under vacuum and back-filled twice with N<sub>2</sub>, followed by the addition of DMF (80 mL) and H<sub>2</sub>O (0.48 mL, 26.6 mmol). The reaction was stirred vigorously at room temperature while bubbling with N<sub>2</sub> for 1 hour. The resulting mixture was stirred overnight and filtered through a pad of Celite<sup>®</sup>. The filtrate was diluted with H<sub>2</sub>O (800 mL) and the aqueous layer was extracted with ethyl acetate (3 × 500 mL). The combined organic phase was washed with H<sub>2</sub>O (500 mL × 2) and brine (500 mL), dried over Na<sub>2</sub>SO<sub>4</sub>, and concentrated *in vacuo*. The crude material was purified by flash column chromatography (EtOAc:hexane 1:20 to 1:10), affording recovered aldehyde **7** along with a mixture of homoallylic alcohols **9** and **SI-7** (11.0 g, 17.9 mmol, 67%, 2:1 *dr*). The diastereomeric ratio (*dr*) of **9** and **SI-7** was determined by <sup>1</sup>H NMR (See Figure S1). The products undergo lactonization upon standing to give **SI-8** and **SI-9**, respectively, and were therefore used immediately to the next step. The <sup>1</sup>H NMR coupling constant between the C-6/C-7 protons on **SI-8** and **SI-9** are 8.61 Hz and 8.43 Hz respectively implying that these compounds have the same relative configuration in this sector and thus the minor isomer has the structure depicted for **SI-7**.

When allyl bromide **8** was used in excess or more than 1 equivalent of H<sub>2</sub>O was added, a mixture of Diels-Alder dimers derived from intermediate **SI-6** was obtained in addition to the aforementioned products. Compounds **9**, **SI-7**, **SI-8**, **SI-9** and dimerization products from **SI-6** are of similar polarity in various solvent systems, and thus inseparable.

[Notes: Lactonization of **SI-7** is faster than that of the desired diastereomer **9**, which is beneficial for the purpose of product separation in the next step. However, formation of large amounts of

SI-8 should be avoided. Lactones SI-8 and SI-9 are not reactive in the conditions of next step.]

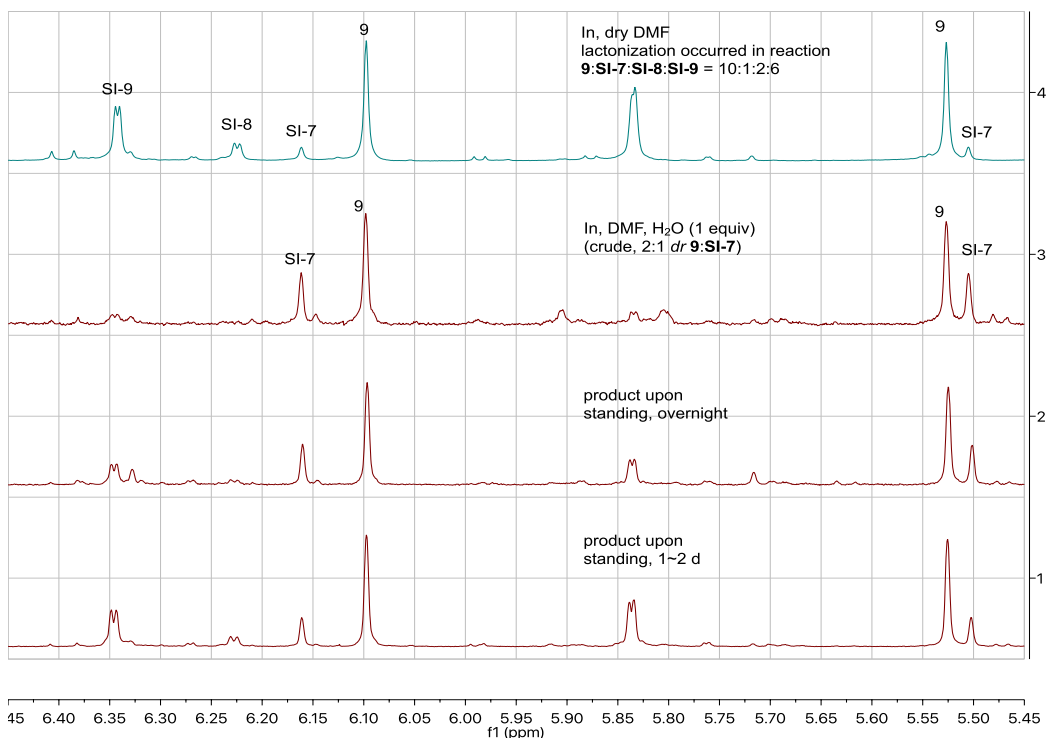

Figure S1. Ratio of products in the indium-mediated allylation reaction.

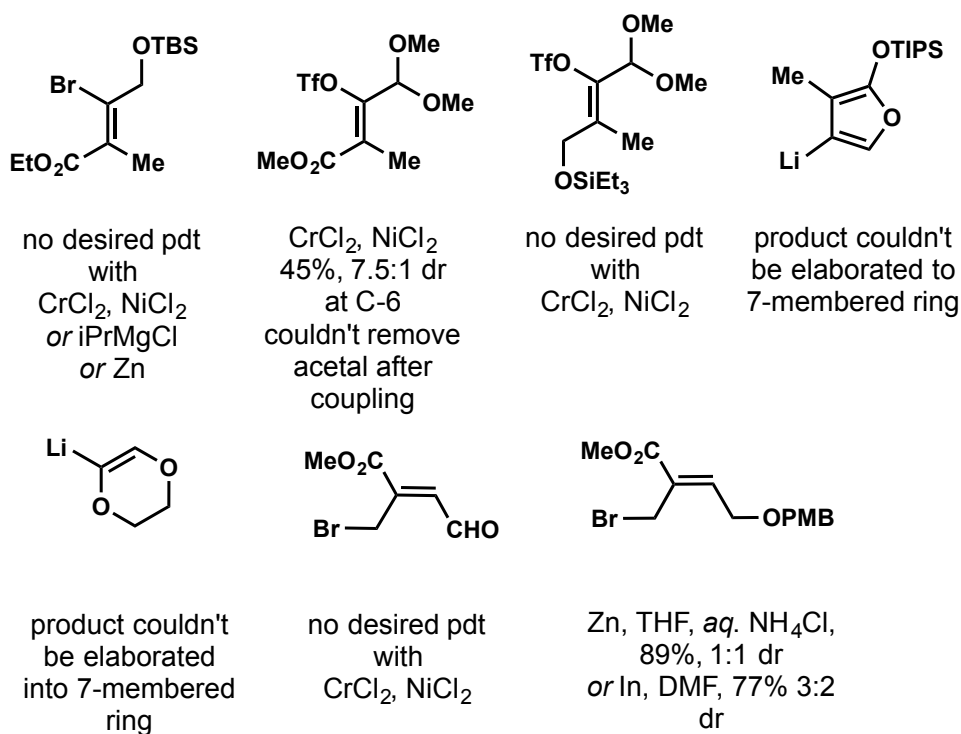

Figure S2. A sampling of other reagents examined (besides 8) in the nucleophilic addition to 7.



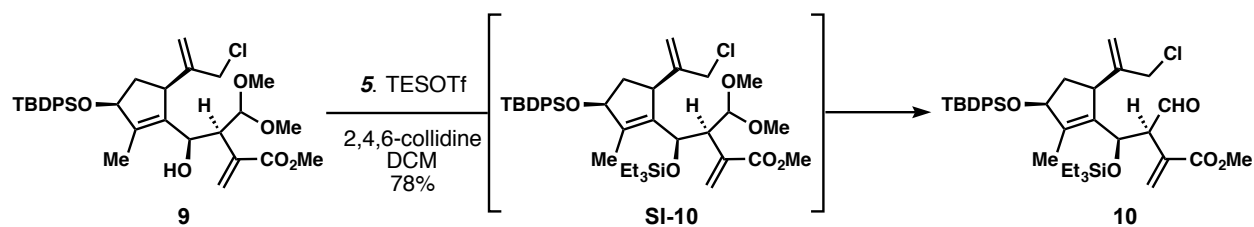

**Triethyl Silyl Aldehyde 10:** This procedure was adapted from previous conditions reported by Kita and coworkers.<sup>1</sup>

A flame-dried 500 mL round-bottom flask equipped with a stir bar was charged with homoallylic alcohols **9** and **SI-7** (12.3 g, 20.1 mmol, 2:1 *dr* **9**:**SI-7**), 2,4,6-collidine (14.5 g, 120 mmol) and DCM (300 mL). The reaction was cooled to  $-78\text{ }^{\circ}\text{C}$  in an acetone-dry ice bath and TESOTf (21.1 g, 80.0 mmol) was added dropwise. The reaction was allowed to warm gradually and stirred at approximately  $0\text{ }^{\circ}\text{C}$  for 24 hours. After the complete consumption of dimethyl acetal **SI-10** as indicated by TLC, the reaction was quenched by the addition of  $\text{H}_2\text{O}$  (50 mL) and stirred at room temperature for 30 min until the disappearance of polar collidine adducts on TLC (EtOAc:hexane 1:5). The resulting mixture was diluted with  $\text{H}_2\text{O}$  (200 mL) and the aqueous layer was extracted with DCM (200 mL  $\times$  3). The combined organic phase was washed with brine (300 mL), dried over  $\text{MgSO}_4$ , and concentrated *in vacuo*. The crude product was purified by flash column chromatography (EtOAc:hexane 1:30), affording triethyl silyl aldehyde **10** (7.05 g, 10.4 mmol, 78% from **9**) separated from its diastereomer as a light yellow oil:  $[\alpha]_{\text{D}}^{20} = +25.0^{\circ}$  (c 0.01 g/mL,  $\text{CHCl}_3$ );  $^1\text{H NMR}$  (500 MHz,  $\text{CDCl}_3$ )  $\delta$  9.86 (d,  $J = 2.1$  Hz, 1H), 7.68 – 7.62 (m, 4H), 7.45 – 7.41 (m, 2H), 7.39 – 7.35 (m, 4H), 6.17 (s, 1H), 5.58 (s, 1H), 5.36 (s, 1H), 5.27 (s, 1H), 5.18 (d,  $J = 9.9$  Hz, 1H), 4.43 (dd,  $J = 7.6, 3.1$  Hz, 1H), 4.31 (d,  $J = 12.5$  Hz, 1H), 4.14 (d,  $J = 12.5$  Hz, 1H), 3.64 (dd,  $J = 9.9, 2.1$  Hz, 1H), 3.63 (s, 3H), 3.19 (ddd,  $J = 8.7, 4.3, 1.8$  Hz, 1H), 2.09 (ddd,  $J = 14.0, 8.7, 7.6$  Hz, 1H), 1.71 (ddd,  $J = 14.0, 4.3, 3.1$  Hz, 1H), 1.46 (d,  $J = 1.8$  Hz, 3H), 1.07 (s, 9H), 0.95 (t,  $J = 7.9$  Hz, 9H), 0.66 – 0.56 (m, 6H);  $^{13}\text{C NMR}$  (150 MHz,  $\text{CDCl}_3$ )  $\delta$  200.8, 166.1, 148.2, 141.1, 138.1, 136.2, 136.2, 134.7, 134.3, 134.2, 129.9, 129.8, 129.8, 127.7, 127.7, 116.3, 80.0, 68.2, 60.3, 52.3, 47.8, 47.6, 40.1, 27.1, 19.4, 12.7, 7.0, 4.9; IR (thin film,  $\text{cm}^{-1}$ ) 3072, 2956, 2932, 2877, 2857, 1718, 1627, 1590, 1470, 1428; HRMS (ESI) calcd. for  $[\text{C}_{38}\text{H}_{53}\text{ClNaO}_5\text{Si}_2]^+$  ( $\text{M}+\text{Na}$ ) $^+$ :  $m/z$  703.3018, found 703.3025

<sup>1</sup> H. Fujioka, T. Okitsu, Y. Sawama, N. Murata, R. Li, Y. Kita, *J. Am. Chem. Soc.* **2006**, *128*, 5930-5938.



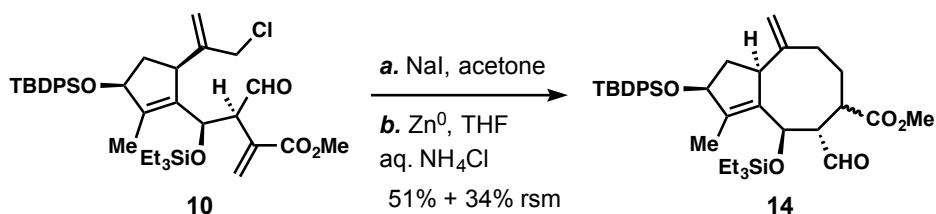

**Cyclooctane 14:** A flame-dried reaction tube was charged with a stir bar, triethyl silyl aldehyde **10** (34.0 mg, 0.0499 mmol), and NaI (75.0 mg, 0.500 mmol). The tube was placed under vacuum and back-filled twice with N<sub>2</sub>, followed by addition of dry acetone (6 mL). The resulting mixture was stirred under cover of alumina foil at 40 °C overnight, and then concentrated *in vacuo*. The crude was re-dissolved in dry diethyl ether and filtered through a pad of Celite®. The filtrate was collected in another reaction tube wrapped by alumina foil and concentrated *in vacuo*. Activated zinc powder (32.0 mg, 0.496 mmol) and THF (2 mL) was added to the reaction followed by the addition of degassed saturated aq. NH<sub>4</sub>Cl (1 mL). The reaction was vigorously stirred for 20 min and the aqueous layer was extracted with ethyl acetate (5 mL × 3). The combined organic phase was washed with H<sub>2</sub>O (10 mL), dried over Na<sub>2</sub>SO<sub>4</sub>, and concentrated *in vacuo*. Flash column chromatography (EtOAc:hexane 1:20) afforded recovered **10** (11.5 mg, 0.0169 mmol, 34%) and cyclooctane **14** (16.5 mg, 0.0240 mmol, 51%, 5:2 *dr*) as a colorless oil that was an inseparable mixture of two diastereomers: IR (thin film, cm<sup>-1</sup>) 3072, 2957, 2932, 2877, 2857, 1735, 1635, 1471, 1429; HRMS (EI) calcd. for [C<sub>38</sub>H<sub>54</sub>O<sub>5</sub>Si<sub>2</sub>]: m/z 646.3510, found 646.3503; Major diastereomer: <sup>1</sup>H NMR (600 MHz, CDCl<sub>3</sub>) δ 9.93 (d, *J* = 2.1 Hz, 1H), 7.72 – 7.65 (m, 4H), 7.46 – 7.34 (m, 6H), 4.85 (br t, *J* = 1.7 Hz, 1H), 4.83 (br s, 1H), 4.63 – 4.57 (m, 1H), 4.21 (d, *J* = 10.4 Hz, 1H), 3.65 (s, 3H), 3.29 – 3.23 (m, 1H), 3.10 – 3.05 (m, 1H), 2.66 – 2.63 (m, 1H), 2.54 (d, *J* = 10.4 Hz, 1H), 2.12 (d, *J* = 9.2 Hz, 1H), 2.00 (dt, *J* = 13.3, 7.5 Hz, 1H), 1.87 (dd, *J* = 2.6, 1.1 Hz, 3H), 1.69 – 1.65 (m, 1H), 1.62 (ddd, *J* = 13.2, 7.9, 6.5 Hz, 1H), 1.59 – 1.54 (m, 1H), 1.09 (s, 9H), 0.81 (t, *J* = 8.0 Hz, 9H), 0.40 (q, *J* = 8.0 Hz, 6H); <sup>13</sup>C NMR (125 MHz, CDCl<sub>3</sub>) δ 206.1, 176.5, 146.9, 140.6, 139.3, 136.2, 136.1, 134.7, 134.2, 129.8, 129.7, 127.7, 127.6, 117.3, 80.5, 71.5, 58.4, 53.3, 52.2, 41.4, 37.6, 34.1, 27.2, 19.4, 12.7, 6.8, 4.6.

**Table 1.** Investigation of metal-mediated allylation conditions for synthesis of **11**.

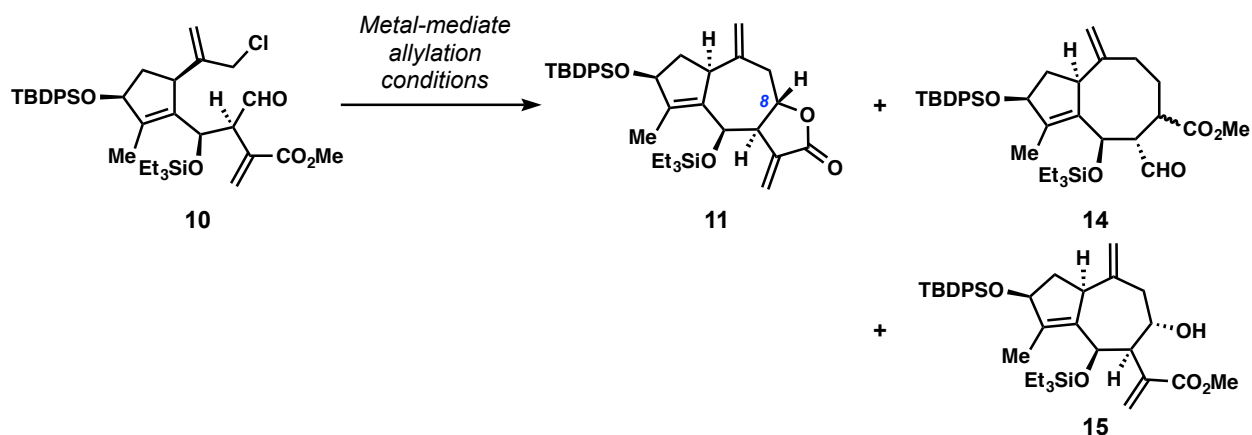

| Entries | Conditions <sup>[a]</sup>                                                                                                              | <b>11</b>               | <b>14</b>                 | <b>15</b>          | rsm |
|---------|----------------------------------------------------------------------------------------------------------------------------------------|-------------------------|---------------------------|--------------------|-----|
| 1       | CrCl <sub>2</sub> (10 equiv), NiCl <sub>2</sub> (0.4 equiv)<br>DMF, 60 °C                                                              | 10%<br>(2:1 <i>dr</i> ) | 17%<br>(3.3:1 <i>dr</i> ) | –                  | –   |
| 2       | In <sup>0</sup> (5 equiv), NaI (10 equiv)<br>DMF, 60 °C                                                                                | 13% <sup>[b]</sup>      | –                         | –                  | –   |
| 3       | <i>i.</i> NaI (10 equiv), acetone<br><i>ii.</i> SmI <sub>2</sub> (4.5 equiv), HMPA-THF (1:10), –78 °C                                  | 27%<br>(2:1 <i>dr</i> ) | 17%<br>(9:1 <i>dr</i> )   | –                  | –   |
| 4       | <i>i.</i> NaI (10 equiv), acetone<br><i>ii.</i> Zn <sup>0</sup> (10 equiv), THF, aq. NH <sub>4</sub> Cl, rt                            | 0%                      | 51%<br>(2.5:1 <i>dr</i> ) | –                  | 34% |
| 5       | <i>i.</i> NaI (10 equiv), acetone<br><i>ii.</i> Mg <sup>0</sup> (30 equiv), cat. (CH <sub>2</sub> Br) <sub>2</sub> , THF<br>0 °C to rt | 0%                      | –                         | –                  | –   |
| 6       | <i>i.</i> NaI (10 equiv), acetone<br><i>ii.</i> iPrMgCl (1.1 equiv), THF, 0 °C to rt                                                   | 0%                      | –                         | –                  | –   |
| 7       | <i>i.</i> NaI (10 equiv), acetone<br><i>ii.</i> SnCl <sub>2</sub> (5 equiv), DMF, rt                                                   | 53% <sup>[b]</sup>      | –                         | 20% <sup>[b]</sup> | 9%  |
| 8       | SnCl <sub>2</sub> (4.5 equiv), NaI (9 equiv)<br>DMF, 60 °C                                                                             | 90% <sup>[b]</sup>      | –                         | –                  | –   |

[a] Reactions performed on 30-mg scale for entries 1-7, performed on 7-gram scale for entry 8; isolated yields reported; [b] Single diastereomer obtained; rsm = recovered starting material.

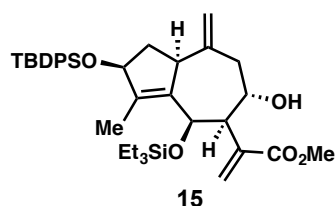

[From Entry 7, Table S1] Cycloheptanol methyl ester **15**, colorless oil: <sup>1</sup>H NMR (500 MHz, CDCl<sub>3</sub>) δ 7.71 – 7.65 (m, 4H), 7.45 – 7.40 (m, 2H), 7.40 – 7.34 (m, 4H), 6.30 (s, 1H), 5.80 (s, 1H), 4.95 (d, *J* = 1.8 Hz, 1H), 4.87 (d, *J* = 1.8 Hz, 1H), 4.57 (dd, *J* = 7.5, 6.8 Hz, 1H),

4.34 (d,  $J = 3.9$  Hz, 1H), 3.90 (br s, 1H), 3.75 (s, 3H), 3.47 (t,  $J = 4.0$  Hz, 1H), 3.00 – 2.91 (m, 1H), 2.66 (dd,  $J = 13.4, 2.6$  Hz, 1H), 2.26 (dd,  $J = 13.4, 6.7$  Hz, 1H), 2.17 (d,  $J = 8.0$  Hz, 1H), 2.02 (ddd,  $J = 12.6, 6.8, 6.8$  Hz, 1H), 1.68 (br s, 3H), 1.43 (ddd,  $J = 12.6, 9.7, 7.5$  Hz, 1H), 1.08 (s, 9H), 0.86 (t,  $J = 8.0$  Hz, 9H), 0.49 (qd,  $J = 8.0, 1.7$  Hz, 6H);  $^{13}\text{C}$  NMR (100 MHz,  $\text{CDCl}_3$ )  $\delta$  169.0, 146.0, 141.9, 140.5, 136.1, 136.1, 136.0, 134.8, 134.3, 129.7, 129.7, 127.7, 127.6, 125.6, 115.2, 80.0, 77.4, 70.1, 69.1, 52.1, 51.3, 50.5, 41.2, 39.3, 27.2, 19.5, 13.4, 6.9, 4.8; IR (thin film,  $\text{cm}^{-1}$ ) 3463, 3072, 3049, 2956, 2932, 2876, 2856, 1775, 1723, 1628, 1470, 1429; HRMS (EI) calcd. for  $[\text{C}_{38}\text{H}_{54}\text{O}_5\text{Si}_2]$ :  $m/z$  646.3510, found 646.3505.

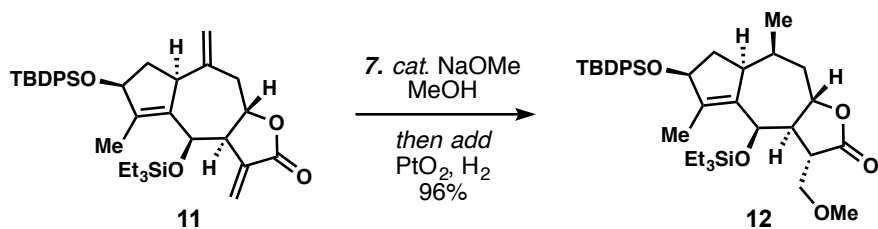

**Mono-reduction product 12:** A flame-dried 250 mL round-bottom flask was charged with a stir bar and unsaturated lactone **11** (6.18 g, 10.0 mmol). The flask was placed under vacuum and back-filled twice with nitrogen, followed by the addition of methanol (100 mL) and DCM (35 mL). NaOMe (54 mg, 1.0 mmol) was then added in one portion to the reaction and the resulting mixture was stirred at room temperature for 16 hours. The reaction was monitored by  $^1\text{H}$  NMR with an aliquot (0.1 mL) concentrated *in vacuo*. After complete consumption of the starting material, acetic acid (60 mL, 1.0 mmol) and  $\text{PtO}_2$  (227 mg, 1.00 mmol) were added sequentially to the reaction. The reaction mixture was bubbled with  $\text{H}_2$  until a black suspension formed, and was stirred under 1 atmosphere of  $\text{H}_2$  for 6 hours. After the reaction was complete as indicated by  $^1\text{H}$  NMR, the reaction mixture was filtered through a pad of Celite<sup>®</sup> and concentrated *in vacuo*. The crude was purified by flash column chromatography (EtOAc:hexane 1:20), affording mono-reduction product **12** (6.23 g, 9.60 mmol, 96%) as a colorless oil:  $[\alpha]_{\text{D}}^{20} = +48.8^\circ$  (c 0.01 g/mL,  $\text{CHCl}_3$ );  $^1\text{H}$  NMR (500 MHz,  $\text{CDCl}_3$ )  $\delta$  7.72 – 7.65 (m, 4H), 7.45 – 7.41 (m, 2H), 7.40 – 7.35 (m, 4H), 4.81 (ddd,  $J = 12.1, 10.2, 3.9$  Hz, 1H), 4.64 (s, 1H), 4.52 (br t,  $J = 7.4$  Hz, 1H), 3.65 (dd,  $J = 9.8, 4.8$  Hz, 1H), 3.59 (dd,  $J = 9.8, 3.5$  Hz, 1H), 3.30 (s, 3H), 2.81 (ddd,  $J = 12.0, 4.8, 3.5$  Hz, 1H), 2.58 – 2.50 (m, 1H), 2.28 (ddd,  $J = 12.7, 3.9, 3.9$  Hz, 1H), 2.14 (dd,  $J = 12.0, 10.2$  Hz, 1H), 1.93 (ddd,  $J = 12.3, 7.4, 7.1$  Hz, 1H), 1.89 – 1.81 (m, 1H), 1.65 – 1.63 (m, 3H), 1.61 (ddd,  $J = 12.7, 12.1, 3.9$  Hz, 1H), 1.51 (ddd,  $J = 12.3, 9.9, 7.4$  Hz, 1H), 1.08 (s, 9H), 1.03 (d,  $J = 7.3$  Hz, 3H), 0.97 (t,  $J = 7.9$  Hz, 9H), 0.72 – 0.57 (m, 6H);  $^{13}\text{C}$  NMR (125 MHz,  $\text{CDCl}_3$ )  $\delta$  176.2, 143.1, 139.0, 136.1, 136.1, 134.6, 134.4, 129.7, 129.7, 127.6, 127.6, 79.4, 76.5, 68.9, 63.8, 59.4, 50.2, 50.0, 44.1, 40.9, 39.3, 31.5, 27.1, 19.4, 13.9, 13.0, 7.2, 5.7; IR (thin film,  $\text{cm}^{-1}$ ) 3071, 2958, 2932, 2876, 2857, 1781, 1472, 1428, 1389; HRMS (EI) calcd. for  $[\text{C}_{38}\text{H}_{56}\text{O}_5\text{Si}_2]$ :  $m/z$  648.3666, found 648.3660.

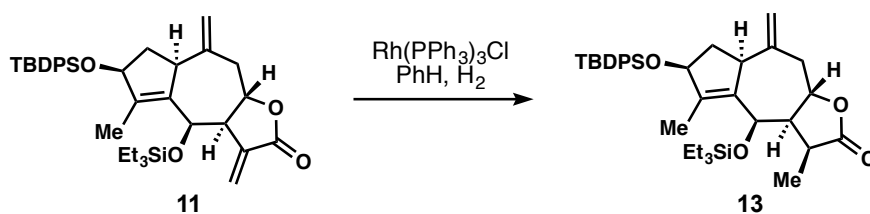

**Methyl lactone 13:** A flame-dried 25 mL round-bottom flask equipped with a stir bar was charged with unsaturated lactone **11** (560 mg, 0.911 mmol) and Wilkinson's catalyst (83.0 mg, 0.0897 mmol), followed by addition of anhydrous benzene (10 mL). The reaction mixture was bubbled with H<sub>2</sub> for 5 minutes, and was stirred under 1 atmosphere of H<sub>2</sub> for 1 hour. The reaction mixture was then concentrated *in vacuo* when TLC indicated full conversion of the starting material. The crude was purified by flash column chromatography (EtOAc:hexane 1:20), affording methyl lactone **13** (304 mg, 0.493 mmol, 54%) as a colorless oil:  $[\alpha]_D^{20} = +62.0^\circ$  (c 0.0025 g/mL, CHCl<sub>3</sub>); <sup>1</sup>H NMR (500 MHz, CDCl<sub>3</sub>)  $\delta$  7.73 – 7.67 (m, 4H), 7.46 – 7.41 (m, 2H), 7.40 – 7.36 (m, 4H), 5.01 (s, 1H), 4.90 (s, 1H), 4.90 – 4.84 (m, 1H), 4.72 (s, 1H), 4.59 – 4.53 (m, 1H), 3.06 (dd,  $J = 11.6, 5.0$  Hz, 1H), 2.80 (br s, 1H), 2.66 (app p,  $J = 7.8$  Hz, 1H), 2.21 (dd,  $J = 10.5, 7.8$  Hz, 1H), 2.11 (dd,  $J = 11.6, 11.6$  Hz, 1H), 1.93 (dt,  $J = 11.6, 6.0$  Hz, 1H), 1.83 (td,  $J = 11.6, 8.3$  Hz, 1H), 1.69 (dd,  $J = 2.5, 1.1$  Hz, 3H), 1.32 (d,  $J = 7.8$  Hz, 3H), 1.10 (s, 9H), 0.94 (t,  $J = 8.0$  Hz, 9H), 0.61 (q,  $J = 8.0$  Hz, 6H); <sup>13</sup>C NMR (100 MHz, CDCl<sub>3</sub>)  $\delta$  179.6, 142.3, 140.1, 138.5, 136.1, 136.1, 134.6, 134.2, 129.8, 129.8, 127.7, 127.7, 113.4, 78.7, 77.6, 63.9, 49.7, 48.4, 45.4, 39.9, 39.3, 27.1, 19.5, 12.9, 12.4, 7.3, 5.6. IR (thin film, cm<sup>-1</sup>) 3072, 2957, 2933, 2876, 2856, 1776, 1467, 1589, 1471, 1458; HRMS (EI) calcd. for [C<sub>37</sub>H<sub>52</sub>O<sub>4</sub>Si<sub>2</sub>]: m/z 616.3404, found 616.3400.

[When the reaction was not stopped after completion, over reduction could afford 0~10% double-reduction product **SI-11** (see below), which was inseparable from **13**.]

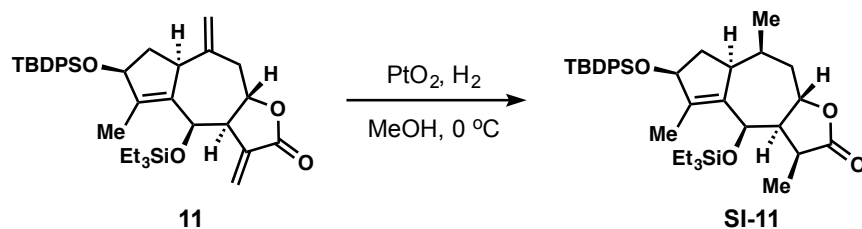

**Double-reduction product SI-11:** A flame-dried 10 mL round-bottom flask equipped with a stir bar was charged with unsaturated lactone **11** (21.0 mg, 0.0341 mmol) and PtO<sub>2</sub> (1.0 mg, 0.0044 mmol). The flask was placed under vacuum and back-filled with H<sub>2</sub>. Anhydrous methanol (0.5 mL) was added and the reaction was cooled to 0 °C. The reaction mixture was bubbled with H<sub>2</sub> until a black suspension formed, and was then stirred under 1 atmosphere of H<sub>2</sub> for 2 hours. After the reaction was complete as indicated by TLC (EtOAc:hexane 1:5), the reaction mixture was filtered through a pad of Celite<sup>®</sup> and concentrated *in vacuo*. The crude was purified by flash column chromatography (EtOAc:hexane 1:20), affording double-reduction product **SI-11** (14.1 mg, 0.0228 mmol, 67%) as a colorless oil:  $[\alpha]_D^{20} = +28.4^\circ$  (c 0.005 g/mL, CHCl<sub>3</sub>); <sup>1</sup>H NMR (600 MHz, CDCl<sub>3</sub>)  $\delta$  7.73 – 7.65 (m, 4H), 7.46 – 7.40 (m, 2H), 7.41 – 7.34 (m, 4H), 5.04 (ddd,  $J = 11.5, 10.3, 4.2$  Hz, 1H), 4.71 (s, 1H), 4.50 (br t,  $J = 7.2$  Hz, 1H), 2.66 (app p,  $J = 8.0$  Hz, 1H), 2.50 (dddd,  $J = 11.4, 7.0, 2.5, 2.5$  Hz, 1H), 2.34 (ddd,  $J = 12.8, 4.2, 4.2$  Hz, 1H), 2.08 (dd,  $J = 10.3, 8.7$  Hz, 1H), 1.89 – 1.81 (m, 2H), 1.69 (dd,  $J = 2.5, 1.1$  Hz, 3H), 1.59 – 1.48 (m, 2H), 1.35 (d,  $J = 7.8$  Hz, 3H), 1.09 (s, 9H), 1.06 (d,  $J = 7.3$  Hz, 3H), 1.00 (t,  $J = 8.0$  Hz, 9H), 0.78 – 0.66 (m, 6H); <sup>13</sup>C NMR (150 MHz, CDCl<sub>3</sub>)  $\delta$  179.9, 141.8, 139.7, 136.2, 136.1, 134.7, 134.4, 129.8, 129.7, 127.7, 127.6, 79.3, 77.1, 64.0, 49.7, 49.7, 42.2, 40.1, 39.7, 31.3, 27.1, 19.5, 13.9, 13.5, 13.2, 7.6, 5.9; IR (thin film, cm<sup>-1</sup>) 3072, 3049, 2958, 2932, 2877, 2856, 1776, 1740, 1458, 1428; HRMS (EI) calcd. for [C<sub>37</sub>H<sub>54</sub>O<sub>4</sub>Si<sub>2</sub>]:  $m/z$  618.3561, found 618.3548.





1H), 4.52 (dd,  $J = 8.0, 5.1$  Hz, 1H), 2.87 – 2.82 (m, 1H), 2.80 (dddd,  $J = 9.6, 3.4, 3.1, 1.6$  Hz, 1H), 2.53 (ddd,  $J = 14.0, 8.4, 8.0$  Hz, 1H), 2.39 (ddd,  $J = 12.6, 3.7, 3.7$  Hz, 1H), 2.06 – 1.99 (m, 1H), 1.90 (d,  $J = 2.2$  Hz, 3H), 1.80 (ddd,  $J = 12.6, 12.6, 3.7$  Hz, 1H), 1.41 (ddd,  $J = 14.0, 6.1, 5.1$  Hz, 1H), 0.98 (d,  $J = 7.3$  Hz, 3H);  $^{13}\text{C}$  NMR (150 MHz,  $\text{CDCl}_3$ )  $\delta$  169.8, 145.1, 139.4, 137.1, 120.4, 79.0, 75.6, 63.5, 51.2, 50.4, 40.9, 38.8, 32.8, 13.5, 12.6; IR (thin film,  $\text{cm}^{-1}$ ) 3448, 2960, 2924, 2877, 2855, 1748, 1662, 1463, 1404, 1384; HRMS (EI) calcd. for  $[\text{C}_{15}\text{H}_{20}\text{O}_4]$ :  $m/z$  264.1362, found 264.1355. [Note: Diol **SI-12** is unstable in chloroform at room temperature.]

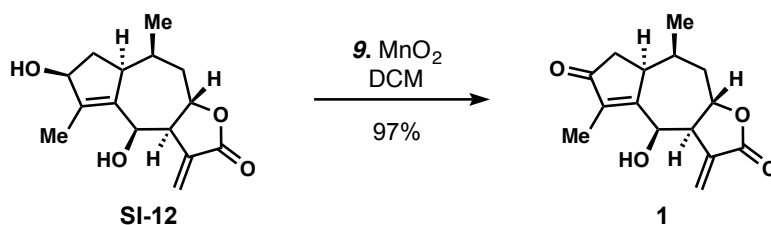

**Mikanokryptin (1):** An oven-dried 100 mL round bottom flask was charged with a stir bar, diol **SI-12** (1.088 g, 4.116 mmol), and DCM (50 mL). Activated  $\text{MnO}_2$  (10.7 g, 123 mmol) was added in one portion. The resulting mixture was stirred vigorously at room temperature for 16 hours. The reaction was monitored by TLC (pure EtOAc), and filtered through a pad of Celite<sup>®</sup> when complete conversion was observed. The filtrate was concentrated *in vacuo*, affording spectroscopically pure mikanokryptin (1.051 g, 4.007 mmol, 97%) as a light-yellow to white solid: mp 230.5 – 232.4 °C;  $[\alpha]_{\text{D}}^{20} = +235.0^\circ$  (lit.  $+264^\circ$ , c 0.00098 g/mL, MeOH);  $^1\text{H}$  NMR (600 MHz,  $\text{CDCl}_3$ )  $\delta$  6.46 (d,  $J = 3.5$  Hz, 1H), 5.70 (d,  $J = 3.1$  Hz, 1H), 5.17 (br s, 1H), 4.80 (ddd,  $J = 12.6, 9.6, 3.5$  Hz, 1H), 3.15 – 3.10 (m, 1H), 3.06 (dddd,  $J = 9.6, 3.5, 3.1, 1.9$  Hz, 1H), 2.67 (ddd,  $J = 19.1, 6.9, 1.1$  Hz, 1H), 2.45 (ddd,  $J = 12.8, 3.5, 3.5$  Hz, 1H), 2.34 – 2.27 (m, 1H), 2.19 (dd,  $J = 19.1, 1.9$  Hz, 1H), 1.94 (ddd,  $J = 12.8, 12.6, 4.1$  Hz, 1H), 1.92 (dd,  $J = 2.1, 0.9$  Hz, 3H), 0.85 (d,  $J = 7.3$  Hz, 3H);  $^1\text{H}$  NMR (600 MHz,  $\text{DMSO}-d_6$ )  $\delta$  6.20 (d,  $J = 3.4$  Hz, 1H), 5.80 (d,  $J = 3.1$  Hz, 1H), 5.74 (d,  $J = 6.5$  Hz, 1H), 5.09 (d,  $J = 6.5$  Hz, 1H), 4.64 (ddd,  $J = 12.5, 9.4, 3.4$  Hz, 1H), 3.24 – 3.14 (m, 2H), 2.55 (dd,  $J = 19.0, 6.7$  Hz, 1H), 2.21 (ddd,  $J = 12.0, 3.4, 3.4$  Hz, 1H), 2.19 – 2.15 (m, 1H), 2.05 (dd,  $J = 19.0, 1.9$  Hz, 1H), 1.94 (ddd,  $J = 12.5, 12.0, 4.0$  Hz, 1H), 1.76 (d,  $J = 1.0$  Hz, 3H), 0.73 (d,  $J = 7.1$  Hz, 3H);  $^{13}\text{C}$  NMR (150 MHz,  $\text{DMSO}-d_6$ )  $\delta$  207.2, 172.5, 169.5, 141.5, 136.5, 120.8, 75.0, 62.7, 49.5, 44.2, 40.9, 39.4, 32.4, 12.5, 8.6; IR (thin film,  $\text{cm}^{-1}$ ) 3434, 2961, 2924, 2882, 1762, 1679, 1633, 1450, 1407, 1385, 1325; HRMS (EI) calcd. for  $[\text{C}_{15}\text{H}_{18}\text{O}_4]$ :  $m/z$  262.1205, found 262.1207.

**Table S2.** <sup>1</sup>H NMR comparison of natural and synthetic mikanokryptin (**1**).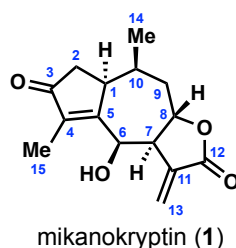

|                     | mikanokryptin ( <b>1</b> ) <sup>1</sup>      | mikanokryptin ( <b>1</b> )<br>this work <sup>2</sup> | mikanokryptin ( <b>1</b> ) <sup>3</sup>                   | mikanokryptin ( <b>1</b> )<br>this work              |
|---------------------|----------------------------------------------|------------------------------------------------------|-----------------------------------------------------------|------------------------------------------------------|
| C                   | 90 MHz, <i>d</i> -DMSO                       | 600 MHz, <i>d</i> -DMSO                              | 200 MHz,<br>95% CDCl <sub>3</sub> – 5% <i>d</i> -DMSO     | 600 MHz, CDCl <sub>3</sub>                           |
| 1                   | 3.16 (m, 1H)                                 | 3.19 (m, 1H)                                         | 3.12 (dddd, <i>J</i> = 6.8, 2.2,<br>2.0, 2.0, 1.0 Hz, 1H) | 3.12 (m, 1H)                                         |
| 2 $\alpha$          | obscured signal                              | 2.55 (dd, <i>J</i> = 19.0, 6.7 Hz,<br>1H)            | 2.65 (ddd, <i>J</i> = 19.1, 6.8,<br>1.1 Hz, 1H)           | 2.67 (ddd, <i>J</i> = 19.1, 6.9,<br>1.1 Hz, 1H)      |
| 2 $\beta$           | obscured signal                              | 2.05 (dd, <i>J</i> = 19.0, 1.9 Hz,<br>1H)            | 2.17 (dd, <i>J</i> = 19.1, 2.0 Hz,<br>1H)                 | 2.19 (dd, <i>J</i> = 19.1, 1.9 Hz,<br>1H)            |
| 6                   | 5.10 (br d, <i>J</i> = 6.2 Hz, 1H)           | 5.09 (d, <i>J</i> = 6.5 Hz, 1H)                      | 5.13 (dddd, <i>J</i> = 5.6, 3.5,<br>1.1, 1.0, 0.8 Hz, 1H) | 5.17 (br s, 1H)                                      |
| 7                   | 3.16 (m, 1H)                                 | 3.19 (m, 1H)                                         | 3.01 (dddd, <i>J</i> = 9.6, 3.5,<br>3.4, 3.0 Hz, 1H)      | 3.06 (dddd, <i>J</i> = 9.6, 3.5,<br>3.1, 1.9 Hz, 1H) |
| 8                   | 4.66 (ddd, <i>J</i> = 12, 10, 3.7<br>Hz, 1H) | 4.64 (ddd, <i>J</i> = 12.5, 9.4,<br>3.4 Hz, 1H)      | 4.84 (ddd, <i>J</i> = 12.1, 9.6,<br>3.5 Hz, 1H)           | 4.80 (ddd, <i>J</i> = 12.6, 9.6,<br>3.5 Hz, 1H)      |
| 9 $\alpha$          | obscured signal                              | 1.94 (ddd, <i>J</i> = 12.5, 12.0,<br>4.0 Hz, 1H)     | 1.92 (ddd, <i>J</i> = 12.6, 12.1,<br>3.9 Hz, 1H)          | 1.94 (ddd, <i>J</i> = 12.8, 12.6,<br>4.1 Hz, 1H)     |
| 9 $\beta$           | obscured signal                              | 2.21 (ddd, <i>J</i> = 12.0, 3.4,<br>3.4 Hz, 1H)      | 2.42 (ddd, <i>J</i> = 12.6, 3.5,<br>3.5 Hz, 1H)           | 2.45 (ddd, <i>J</i> = 12.8, 3.5,<br>3.5 Hz, 1H)      |
| 10                  | obscured signal                              | 2.17 (m, 1H)                                         | 2.29 (dddd, <i>J</i> = 7.3, 3.9,<br>3.5, 2.2 Hz, 1H)      | 2.31 (m, 1H)                                         |
| 13 <sub>cis</sub>   | 6.24 (d, <i>J</i> = 3.5 Hz, 1H)              | 6.20 (d, <i>J</i> = 3.4 Hz, 1H)                      | 6.40 (d, <i>J</i> = 3.4 Hz, 1H)                           | 6.46 (d, <i>J</i> = 3.5 Hz, 1H)                      |
| 13 <sub>trans</sub> | 5.81 (d, <i>J</i> = 3.1 Hz, 1H)              | 5.80 (d, <i>J</i> = 3.1 Hz, 1H)                      | 5.72 (d, <i>J</i> = 3.0 Hz, 1H)                           | 5.70 (d, <i>J</i> = 3.1 Hz, 1H)                      |
| 14                  | 0.69 (d, <i>J</i> = 7.2 Hz, 1H)              | 0.73 (d, <i>J</i> = 7.1 Hz, 3H)                      | 1.90 (dd, <i>J</i> = 2.0, 0.8 Hz,<br>3H)                  | 1.92 (dd, <i>J</i> = 2.1, 0.9 Hz,<br>3H)             |
| 15                  | 1.74 (dd, <i>J</i> = 1, 0.9 Hz, 1H)          | 1.76 (d, <i>J</i> = 1.0 Hz, 3H)                      | 0.86 (d, <i>J</i> = 7.3 Hz, 3H)                           | 0.85 (d, <i>J</i> = 7.3 Hz, 3H)                      |
| OH                  | 5.60 (d, <i>J</i> = 6.2 Hz, 1H)              | 5.74 (d, <i>J</i> = 6.5 Hz, 1H)                      | 4.54 (d, <i>J</i> = 5.6 Hz, 1H)                           | not observed                                         |

<sup>1</sup> W. Herz, A. Srinivasan, P. S. Kalyanaraman, *Phytochemistry* **1975**, *14*, 233.

<sup>2</sup> Crystallographic Analysis of synthetic **1** matches with that reported in: M. J. Bovill, M. H. P. Guy, G. A. Sim, D. N. J. White, W. Herz, *J. Chem. Soc., Perkin Trans. 2* **1979**, 53.

<sup>3</sup> W. F. Reynolds, R. G. Enriquez, M. A. Chavez, A. L. Silba, M. A. Martinez, *Can. J. Chem.* **1985**, *63*, 849. Standard inversion-recovery pulse sequence was utilized by choosing a delay time (0.88 s) for which the methyl signal is nulled. For details, see the original paper.

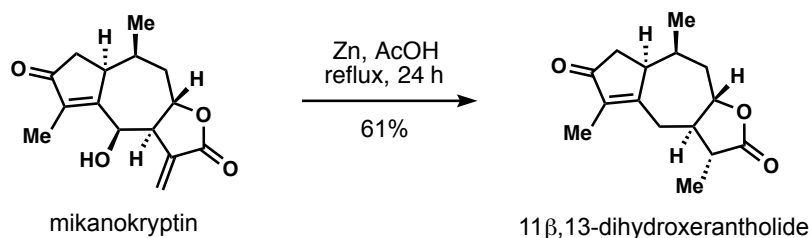

**11β,13-dihydroxerantholide:** This procedure was adapted from previous conditions reported by Barton and coworkers.<sup>1</sup>

A flame-dried reaction tube equipped with a stir bar was charged with mikanokryptin (26.0 mg, 0.0991 mmol) and activated zinc powder (98 mg, 1.5 mmol). The tube was placed under vacuum and back-filled with N<sub>2</sub>, followed by the addition of degassed acetic acid (0.8 mL). The reaction was heated at 120 °C for 24 hours, diluted with ethyl acetate and filtered through a pad of Celite<sup>®</sup>. The filtrate was concentrated *in vacuo* and purified by flash column chromatography (EtOAc:hexane 1:1), affording 11β,13-dihydroxerantholide (15.0 mg, 0.0604 mmol, 61%) as a colorless oil:  $[\alpha]_{\text{D}}^{20} = +153.1^{\circ}$  (c= 0.01 g/mL, CHCl<sub>3</sub>); <sup>1</sup>H NMR (600 MHz, CDCl<sub>3</sub>) δ 4.15 (ddd, *J* = 12.1, 10.0, 3.7 Hz, 1H), 3.13 (dq, *J* = 6.6, 2.0 Hz, 1H), 2.98 (ddd, *J* = 19.0, 3.2, 1.6 Hz, 1H), 2.62 (ddd, *J* = 19.0, 6.6, 1.2 Hz, 1H), 2.42 – 2.34 (m, 3H), 2.29 – 2.23 (m, 1H), 2.13 – 2.06 (m, 2H), 1.81 (ddd, *J* = 12.1, 12.1, 4.1 Hz, 1H), 1.70 (q, *J* = 1.5 Hz, 3H), 1.28 (d, *J* = 7.0 Hz, 3H), 0.73 (d, *J* = 7.3 Hz, 3H); <sup>13</sup>C NMR (125 MHz, CDCl<sub>3</sub>) δ 207.2, 178.1, 170.6, 139.5, 81.4, 48.1, 45.2, 42.1, 41.4, 40.5, 33.0, 31.4, 13.0, 13.0, 8.3; IR (thin film, cm<sup>-1</sup>) 2965, 2931, 2876, 1771, 1695, 1636, 1456, 1383; HRMS (ESI) calcd. for [C<sub>15</sub>H<sub>20</sub>NaO<sub>3</sub>]<sup>+</sup> (M+Na)<sup>+</sup>: *m/z* 271.1310, found 271.1315.

<sup>1</sup> D. H. R. Barton, J. E. D. Levisalles, *J. Chem. Soc.* **1958**, 4518-4523.

## X-Ray Crystallographic Analysis of Desilylated (–)-11

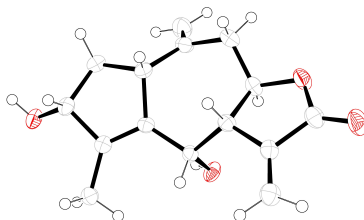

A colorless blade 0.070 x 0.040 x 0.020 mm in size was mounted on a Cryoloop with Paratone oil. Data were collected in a nitrogen gas stream at 100(2) K using  $\omega$  scans. Crystal-to-detector distance was 60 mm and exposure time was 5 seconds per frame using a scan width of 2.0°. Data collection was 100.0% complete to 67.000° in  $\theta$ . A total of 22793 reflections were collected covering the indices,  $-8 \leq h \leq 8$ ,  $-9 \leq k \leq 9$ ,  $-15 \leq l \leq 14$ . 2366 reflections were found to be symmetry independent, with an  $R_{\text{int}}$  of 0.0609. Indexing and unit cell refinement indicated a primitive, monoclinic lattice. The space group was found to be P 21 (No. 4). The data were integrated using the Bruker SAINT software program and scaled using the SADABS software program. Solution by iterative methods (SHELXT-2014) produced a complete heavy-atom phasing model consistent with the proposed structure. All non-hydrogen atoms were refined anisotropically by full-matrix least-squares (SHELXL-2014). All hydrogen atoms were placed using a riding model. Their positions were constrained relative to their parent atom using the appropriate HFIX command in SHELXL-2014. Absolute stereochemistry was unambiguously determined to be *R* at C1, C3, C7, and C10, and *S* at C6, respectively.

Table 1. Crystal data and structure refinement for Desilylated (–)-11.

|                                   |                                                |                  |
|-----------------------------------|------------------------------------------------|------------------|
| X-ray ID                          | maimone75                                      |                  |
| Sample/notebook ID                | XH_183_tbaF                                    |                  |
| Empirical formula                 | C <sub>15</sub> H <sub>18</sub> O <sub>4</sub> |                  |
| Formula weight                    | 262.29                                         |                  |
| Temperature                       | 100(2) K                                       |                  |
| Wavelength                        | 1.54178 Å                                      |                  |
| Crystal system                    | Monoclinic                                     |                  |
| Space group                       | P 21                                           |                  |
| Unit cell dimensions              | a = 6.7293(2) Å                                | α = 90°.         |
|                                   | b = 7.8229(2) Å                                | β = 101.647(2)°. |
|                                   | c = 12.5521(4) Å                               | γ = 90°.         |
| Volume                            | 647.17(3) Å <sup>3</sup>                       |                  |
| Z                                 | 2                                              |                  |
| Density (calculated)              | 1.346 Mg/m <sup>3</sup>                        |                  |
| Absorption coefficient            | 0.796 mm <sup>-1</sup>                         |                  |
| F(000)                            | 280                                            |                  |
| Crystal size                      | 0.070 x 0.040 x 0.020 mm <sup>3</sup>          |                  |
| Theta range for data collection   | 3.595 to 68.310°.                              |                  |
| Index ranges                      | -8 ≤ h ≤ 8, -9 ≤ k ≤ 9, -15 ≤ l ≤ 14           |                  |
| Reflections collected             | 22793                                          |                  |
| Independent reflections           | 2366 [R(int) = 0.0609]                         |                  |
| Completeness to theta = 67.000°   | 100.0 %                                        |                  |
| Absorption correction             | Semi-empirical from equivalents                |                  |
| Max. and min. transmission        | 0.929 and 0.795                                |                  |
| Refinement method                 | Full-matrix least-squares on F <sup>2</sup>    |                  |
| Data / restraints / parameters    | 2366 / 1 / 175                                 |                  |
| Goodness-of-fit on F <sup>2</sup> | 1.070                                          |                  |
| Final R indices [I > 2σ(I)]       | R1 = 0.0391, wR2 = 0.0958                      |                  |
| R indices (all data)              | R1 = 0.0420, wR2 = 0.0980                      |                  |
| Absolute structure parameter      | 0.07(10)                                       |                  |
| Extinction coefficient            | n/a                                            |                  |
| Largest diff. peak and hole       | 0.245 and -0.147 e.Å <sup>-3</sup>             |                  |

Table 2. Atomic coordinates ( $\times 10^4$ ) and equivalent isotropic displacement parameters ( $\text{\AA}^2 \times 10^3$ ) for maimone75.  $U(\text{eq})$  is defined as one third of the trace of the orthogonalized  $U^{ij}$  tensor.

|       | x        | y       | z       | $U(\text{eq})$ |
|-------|----------|---------|---------|----------------|
| C(1)  | 3592(4)  | 2776(3) | 2431(2) | 24(1)          |
| C(2)  | 4225(4)  | 1126(3) | 3061(2) | 27(1)          |
| C(3)  | 2723(4)  | 934(3)  | 3818(2) | 25(1)          |
| C(4)  | 2224(4)  | 2767(3) | 4032(2) | 23(1)          |
| C(5)  | 2657(4)  | 3791(3) | 3254(2) | 22(1)          |
| C(6)  | 2056(4)  | 5653(3) | 3144(2) | 22(1)          |
| C(7)  | 1731(4)  | 6226(3) | 1953(2) | 23(1)          |
| C(8)  | 592(4)   | 7864(4) | 1641(2) | 25(1)          |
| C(9)  | 1523(4)  | 8701(4) | 802(2)  | 31(1)          |
| C(10) | 3699(4)  | 6517(4) | 1540(2) | 27(1)          |
| C(11) | 4542(4)  | 4963(4) | 1075(2) | 30(1)          |
| C(12) | 5241(4)  | 3644(4) | 1951(2) | 27(1)          |
| C(13) | 1249(4)  | 3212(4) | 4963(2) | 30(1)          |
| C(14) | -1064(4) | 8497(4) | 1939(2) | 32(1)          |
| C(15) | 7196(5)  | 3252(4) | 2233(3) | 39(1)          |
| O(1)  | 3213(3)  | 7836(3) | 702(2)  | 33(1)          |
| O(2)  | 3494(3)  | 19(2)   | 4790(2) | 29(1)          |
| O(3)  | 3510(3)  | 6735(2) | 3824(2) | 30(1)          |
| O(4)  | 963(3)   | 9956(3) | 265(2)  | 41(1)          |

Table 3. Bond lengths [Å] and angles [°] for maimone75.

|                  |          |                 |          |
|------------------|----------|-----------------|----------|
| C(1)-C(12)       | 1.525(4) | C(8)-C(9)       | 1.483(4) |
| C(1)-C(2)        | 1.529(4) | C(9)-O(4)       | 1.207(4) |
| C(1)-C(5)        | 1.534(4) | C(9)-O(1)       | 1.351(4) |
| C(1)-H(1)        | 1.0000   | C(10)-O(1)      | 1.463(3) |
| C(2)-C(3)        | 1.528(4) | C(10)-C(11)     | 1.509(4) |
| C(2)-H(2A)       | 0.9900   | C(10)-H(10)     | 1.0000   |
| C(2)-H(2B)       | 0.9900   | C(11)-C(12)     | 1.512(4) |
| C(3)-O(2)        | 1.420(3) | C(11)-H(11A)    | 0.9900   |
| C(3)-C(4)        | 1.509(4) | C(11)-H(11B)    | 0.9900   |
| C(3)-H(3)        | 1.0000   | C(12)-C(15)     | 1.327(4) |
| C(4)-C(5)        | 1.340(4) | C(13)-H(13A)    | 0.9800   |
| C(4)-C(13)       | 1.492(4) | C(13)-H(13B)    | 0.9800   |
| C(5)-C(6)        | 1.511(4) | C(13)-H(13C)    | 0.9800   |
| C(6)-O(3)        | 1.438(3) | C(14)-H(14A)    | 0.9500   |
| C(6)-C(7)        | 1.533(4) | C(14)-H(14B)    | 0.9500   |
| C(6)-H(6)        | 1.0000   | C(15)-H(15A)    | 0.9500   |
| C(7)-C(8)        | 1.503(4) | C(15)-H(15B)    | 0.9500   |
| C(7)-C(10)       | 1.533(3) | O(2)-H(2)       | 0.8400   |
| C(7)-H(7)        | 1.0000   | O(3)-H(3A)      | 0.8400   |
| C(8)-C(14)       | 1.339(4) |                 |          |
| C(12)-C(1)-C(2)  | 115.6(2) | O(2)-C(3)-C(2)  | 114.3(2) |
| C(12)-C(1)-C(5)  | 117.7(2) | C(4)-C(3)-C(2)  | 102.5(2) |
| C(2)-C(1)-C(5)   | 101.4(2) | O(2)-C(3)-H(3)  | 109.1    |
| C(12)-C(1)-H(1)  | 107.1    | C(4)-C(3)-H(3)  | 109.1    |
| C(2)-C(1)-H(1)   | 107.1    | C(2)-C(3)-H(3)  | 109.1    |
| C(5)-C(1)-H(1)   | 107.1    | C(5)-C(4)-C(13) | 128.7(3) |
| C(3)-C(2)-C(1)   | 104.7(2) | C(5)-C(4)-C(3)  | 110.4(2) |
| C(3)-C(2)-H(2A)  | 110.8    | C(13)-C(4)-C(3) | 120.7(2) |
| C(1)-C(2)-H(2A)  | 110.8    | C(4)-C(5)-C(6)  | 123.3(2) |
| C(3)-C(2)-H(2B)  | 110.8    | C(4)-C(5)-C(1)  | 111.1(2) |
| C(1)-C(2)-H(2B)  | 110.8    | C(6)-C(5)-C(1)  | 125.2(2) |
| H(2A)-C(2)-H(2B) | 108.9    | O(3)-C(6)-C(5)  | 112.1(2) |
| O(2)-C(3)-C(4)   | 112.4(2) | O(3)-C(6)-C(7)  | 110.7(2) |



|                     |          |                     |          |
|---------------------|----------|---------------------|----------|
| C(5)-C(6)-C(7)      | 110.7(2) | H(13B)-C(13)-H(13C) | 109.5    |
| O(3)-C(6)-H(6)      | 107.7    | C(8)-C(14)-H(14A)   | 120.0    |
| C(5)-C(6)-H(6)      | 107.7    | C(8)-C(14)-H(14B)   | 120.0    |
| C(7)-C(6)-H(6)      | 107.7    | H(14A)-C(14)-H(14B) | 120.0    |
| C(8)-C(7)-C(6)      | 117.9(2) | C(12)-C(15)-H(15A)  | 120.0    |
| C(8)-C(7)-C(10)     | 102.4(2) | C(12)-C(15)-H(15B)  | 120.0    |
| C(6)-C(7)-C(10)     | 114.2(2) | H(15A)-C(15)-H(15B) | 120.0    |
| C(8)-C(7)-H(7)      | 107.2    | C(9)-O(1)-C(10)     | 110.9(2) |
| C(6)-C(7)-H(7)      | 107.2    | C(3)-O(2)-H(2)      | 109.5    |
| C(10)-C(7)-H(7)     | 107.2    | C(6)-O(3)-H(3A)     | 109.5    |
| C(14)-C(8)-C(9)     | 122.0(3) |                     |          |
| C(14)-C(8)-C(7)     | 130.7(3) |                     |          |
| C(9)-C(8)-C(7)      | 107.1(2) |                     |          |
| O(4)-C(9)-O(1)      | 121.9(3) |                     |          |
| O(4)-C(9)-C(8)      | 128.8(3) |                     |          |
| O(1)-C(9)-C(8)      | 109.2(2) |                     |          |
| O(1)-C(10)-C(11)    | 109.7(2) |                     |          |
| O(1)-C(10)-C(7)     | 105.4(2) |                     |          |
| C(11)-C(10)-C(7)    | 115.4(2) |                     |          |
| O(1)-C(10)-H(10)    | 108.7    |                     |          |
| C(11)-C(10)-H(10)   | 108.7    |                     |          |
| C(7)-C(10)-H(10)    | 108.7    |                     |          |
| C(10)-C(11)-C(12)   | 110.7(2) |                     |          |
| C(10)-C(11)-H(11A)  | 109.5    |                     |          |
| C(12)-C(11)-H(11A)  | 109.5    |                     |          |
| C(10)-C(11)-H(11B)  | 109.5    |                     |          |
| C(12)-C(11)-H(11B)  | 109.5    |                     |          |
| H(11A)-C(11)-H(11B) | 108.1    |                     |          |
| C(15)-C(12)-C(11)   | 119.9(3) |                     |          |
| C(15)-C(12)-C(1)    | 123.5(3) |                     |          |
| C(11)-C(12)-C(1)    | 116.5(2) |                     |          |
| C(4)-C(13)-H(13A)   | 109.5    |                     |          |
| C(4)-C(13)-H(13B)   | 109.5    |                     |          |
| H(13A)-C(13)-H(13B) | 109.5    |                     |          |
| C(4)-C(13)-H(13C)   | 109.5    |                     |          |
| H(13A)-C(13)-H(13C) | 109.5    |                     |          |

---

Symmetry transformations used to generate  
equivalent atoms:

Table 4. Anisotropic displacement parameters ( $\text{\AA}^2 \times 10^3$ ) for maimone75. The anisotropic displacement factor exponent takes the form:  $-2\pi^2 [ h^2 a^{*2} U^{11} + \dots + 2 h k a^* b^* U^{12} ]$

|       | U <sup>11</sup> | U <sup>22</sup> | U <sup>33</sup> | U <sup>23</sup> | U <sup>13</sup> | U <sup>12</sup> |
|-------|-----------------|-----------------|-----------------|-----------------|-----------------|-----------------|
| C(1)  | 25(1)           | 24(1)           | 23(1)           | -4(1)           | 4(1)            | 0(1)            |
| C(2)  | 28(1)           | 25(1)           | 28(2)           | -5(1)           | 4(1)            | 2(1)            |
| C(3)  | 28(1)           | 23(1)           | 22(1)           | -2(1)           | -1(1)           | -3(1)           |
| C(4)  | 22(1)           | 24(1)           | 21(1)           | -1(1)           | 0(1)            | -1(1)           |
| C(5)  | 21(1)           | 24(1)           | 18(1)           | -3(1)           | 2(1)            | -2(1)           |
| C(6)  | 25(1)           | 22(1)           | 19(1)           | 0(1)            | 4(1)            | -1(1)           |
| C(7)  | 24(1)           | 27(1)           | 18(1)           | -1(1)           | 2(1)            | -2(1)           |
| C(8)  | 29(1)           | 27(1)           | 17(1)           | 0(1)            | -2(1)           | -3(1)           |
| C(9)  | 31(1)           | 37(2)           | 22(1)           | 5(1)            | 1(1)            | -1(1)           |
| C(10) | 27(1)           | 31(1)           | 23(1)           | 5(1)            | 5(1)            | -1(1)           |
| C(11) | 30(1)           | 37(2)           | 24(1)           | 1(1)            | 9(1)            | -2(1)           |
| C(12) | 29(1)           | 30(1)           | 25(1)           | -4(1)           | 10(1)           | -1(1)           |
| C(13) | 39(1)           | 26(1)           | 25(1)           | 4(1)            | 10(1)           | 3(1)            |
| C(14) | 32(1)           | 35(2)           | 27(1)           | 5(1)            | 1(1)            | 4(1)            |
| C(15) | 33(2)           | 41(2)           | 44(2)           | 4(2)            | 12(1)           | 0(1)            |
| O(1)  | 36(1)           | 38(1)           | 28(1)           | 12(1)           | 11(1)           | 3(1)            |
| O(2)  | 36(1)           | 20(1)           | 29(1)           | 1(1)            | 0(1)            | -1(1)           |
| O(3)  | 42(1)           | 20(1)           | 23(1)           | -2(1)           | -4(1)           | 1(1)            |
| O(4)  | 44(1)           | 43(1)           | 34(1)           | 18(1)           | 5(1)            | 7(1)            |

Table 5. Hydrogen coordinates ( $\times 10^4$ ) and isotropic displacement parameters ( $\text{\AA}^2 \times 10^3$ ) for maimone75.

|        | x     | y     | z    | U(eq) |
|--------|-------|-------|------|-------|
| H(1)   | 2463  | 2478  | 1810 | 29    |
| H(2A)  | 4135  | 139   | 2560 | 33    |
| H(2B)  | 5632  | 1213  | 3484 | 33    |
| H(3)   | 1471  | 351   | 3417 | 30    |
| H(6)   | 734   | 5778  | 3383 | 27    |
| H(7)   | 967   | 5295  | 1500 | 28    |
| H(10)  | 4753  | 6974  | 2152 | 32    |
| H(11A) | 5699  | 5304  | 744  | 36    |
| H(11B) | 3484  | 4459  | 497  | 36    |
| H(13A) | 993   | 4446  | 4962 | 44    |
| H(13B) | 2152  | 2889  | 5647 | 44    |
| H(13C) | -39   | 2595  | 4891 | 44    |
| H(14A) | -1676 | 9512  | 1609 | 38    |
| H(14B) | -1625 | 7931  | 2479 | 38    |
| H(15A) | 8152  | 3799  | 1885 | 46    |
| H(15B) | 7639  | 2424  | 2784 | 46    |
| H(2)   | 3567  | -1025 | 4647 | 43    |
| H(3A)  | 4422  | 6129  | 4199 | 44    |

## X-Ray Crystallographic Analysis of (-)-Mikanokryptin

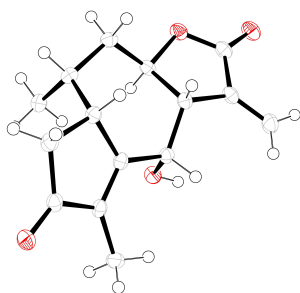

A colorless plate 0.050 x 0.040 x 0.020 mm in size was mounted on a Cryoloop with Paratone oil. Data were collected in a nitrogen gas stream at 100(2) K using  $\omega$  scans. Crystal-to-detector distance was 60 mm and exposure time was 10 seconds per frame using a scan width of 2.0°. Data collection was 99.4% complete to 67.000° in  $\theta$ . A total of 33715 reflections were collected covering the indices,  $-8 \leq h \leq 11$ ,  $-12 \leq k \leq 12$ ,  $-16 \leq l \leq 16$ . 2328 reflections were found to be symmetry independent, with an  $R_{\text{int}}$  of 0.0306. Indexing and unit cell refinement indicated a primitive, orthorhombic lattice. The space group was found to be P 21 21 21 (No. 19). The data were integrated using the Bruker SAINT software program and scaled using the SADABS software program. Solution by iterative methods (SHELXT-2014) produced a complete heavy-atom phasing model consistent with the proposed structure. All non-hydrogen atoms were refined anisotropically by full-matrix least-squares (SHELXL-2014). All hydrogen atoms were placed using a riding model. Their positions were constrained relative to their parent atom using the appropriate HFIX command in SHELXL-2014. Absolute stereochemistry was unambiguously determined to be *R* at C1, C7, C10, and C12, and *S* at C6, respectively.

Table 1. Crystal data and structure refinement for maimone80.

|                                   |                                             |                       |
|-----------------------------------|---------------------------------------------|-----------------------|
| X-ray ID                          | maimone80                                   |                       |
| Sample/notebook ID                | XH_5_MK                                     |                       |
| Empirical formula                 | C15 H18 O4                                  |                       |
| Formula weight                    | 262.29                                      |                       |
| Temperature                       | 100(2) K                                    |                       |
| Wavelength                        | 1.54178 Å                                   |                       |
| Crystal system                    | Orthorhombic                                |                       |
| Space group                       | P 21 21 21                                  |                       |
| Unit cell dimensions              | a = 9.3552(7) Å                             | $\alpha = 90^\circ$ . |
|                                   | b = 10.2688(8) Å                            | $\beta = 90^\circ$ .  |
|                                   | c = 13.2963(11) Å                           | $\gamma = 90^\circ$ . |
| Volume                            | 1277.33(17) Å <sup>3</sup>                  |                       |
| Z                                 | 4                                           |                       |
| Density (calculated)              | 1.364 Mg/m <sup>3</sup>                     |                       |
| Absorption coefficient            | 0.807 mm <sup>-1</sup>                      |                       |
| F(000)                            | 560                                         |                       |
| Crystal size                      | 0.050 x 0.040 x 0.020 mm <sup>3</sup>       |                       |
| Theta range for data collection   | 5.443 to 68.347°.                           |                       |
| Index ranges                      | -8 ≤ h ≤ 11, -12 ≤ k ≤ 12, -16 ≤ l ≤ 16     |                       |
| Reflections collected             | 33715                                       |                       |
| Independent reflections           | 2328 [R(int) = 0.0306]                      |                       |
| Completeness to theta = 67.000°   | 99.4 %                                      |                       |
| Absorption correction             | Semi-empirical from equivalents             |                       |
| Max. and min. transmission        | 0.929 and 0.891                             |                       |
| Refinement method                 | Full-matrix least-squares on F <sup>2</sup> |                       |
| Data / restraints / parameters    | 2328 / 0 / 175                              |                       |
| Goodness-of-fit on F <sup>2</sup> | 1.061                                       |                       |
| Final R indices [I > 2σ(I)]       | R1 = 0.0277, wR2 = 0.0733                   |                       |
| R indices (all data)              | R1 = 0.0280, wR2 = 0.0736                   |                       |
| Absolute structure parameter      | 0.06(3)                                     |                       |
| Extinction coefficient            | n/a                                         |                       |
| Largest diff. peak and hole       | 0.216 and -0.134 e.Å <sup>-3</sup>          |                       |

Table 2. Atomic coordinates ( $\times 10^4$ ) and equivalent isotropic displacement parameters ( $\text{\AA}^2 \times 10^3$ ) for maimone80.  $U(\text{eq})$  is defined as one third of the trace of the orthogonalized  $U^{ij}$  tensor.

|       | x        | y       | z       | $U(\text{eq})$ |
|-------|----------|---------|---------|----------------|
| C(1)  | 6651(2)  | 8272(2) | 4010(1) | 19(1)          |
| C(2)  | 5999(2)  | 8121(2) | 5067(1) | 22(1)          |
| C(3)  | 6217(2)  | 6714(2) | 5361(1) | 20(1)          |
| C(4)  | 7002(2)  | 6068(2) | 4545(1) | 19(1)          |
| C(5)  | 7277(2)  | 6927(2) | 3809(1) | 18(1)          |
| C(6)  | 8167(2)  | 6600(2) | 2892(1) | 18(1)          |
| C(7)  | 8424(2)  | 7775(2) | 2212(1) | 18(1)          |
| C(8)  | 9426(2)  | 7537(2) | 1344(1) | 21(1)          |
| C(9)  | 8866(2)  | 8303(2) | 480(1)  | 22(1)          |
| C(10) | 7072(2)  | 8261(2) | 1686(1) | 19(1)          |
| C(11) | 6222(2)  | 9273(2) | 2252(1) | 20(1)          |
| C(12) | 5539(2)  | 8746(2) | 3223(1) | 20(1)          |
| C(13) | 7433(2)  | 4665(2) | 4608(1) | 24(1)          |
| C(14) | 10588(2) | 6812(2) | 1299(2) | 28(1)          |
| C(15) | 4406(2)  | 7707(2) | 3000(2) | 23(1)          |
| O(1)  | 7597(1)  | 8839(1) | 740(1)  | 23(1)          |
| O(2)  | 5846(2)  | 6217(1) | 6156(1) | 26(1)          |
| O(3)  | 7478(1)  | 5564(1) | 2367(1) | 22(1)          |
| O(4)  | 9391(2)  | 8479(1) | -335(1) | 28(1)          |

Table 3. Bond lengths [Å] and angles [°] for maimone80.

|                  |            |                 |            |
|------------------|------------|-----------------|------------|
| C(1)-C(5)        | 1.524(2)   | C(9)-O(4)       | 1.204(2)   |
| C(1)-C(2)        | 1.539(2)   | C(9)-O(1)       | 1.354(2)   |
| C(1)-C(12)       | 1.554(2)   | C(10)-O(1)      | 1.475(2)   |
| C(1)-H(1)        | 1.0000     | C(10)-C(11)     | 1.510(3)   |
| C(2)-C(3)        | 1.511(3)   | C(10)-H(10)     | 1.0000     |
| C(2)-H(2A)       | 0.9900     | C(11)-C(12)     | 1.539(3)   |
| C(2)-H(2B)       | 0.9900     | C(11)-H(11A)    | 0.9900     |
| C(3)-O(2)        | 1.224(2)   | C(11)-H(11B)    | 0.9900     |
| C(3)-C(4)        | 1.469(2)   | C(12)-C(15)     | 1.533(3)   |
| C(4)-C(5)        | 1.343(3)   | C(12)-H(12)     | 1.0000     |
| C(4)-C(13)       | 1.498(3)   | C(13)-H(13A)    | 0.9800     |
| C(5)-C(6)        | 1.514(2)   | C(13)-H(13B)    | 0.9800     |
| C(6)-O(3)        | 1.426(2)   | C(13)-H(13C)    | 0.9800     |
| C(6)-C(7)        | 1.527(2)   | C(14)-H(14A)    | 0.9500     |
| C(6)-H(6)        | 1.0000     | C(14)-H(14B)    | 0.9500     |
| C(7)-C(8)        | 1.507(3)   | C(15)-H(15A)    | 0.9800     |
| C(7)-C(10)       | 1.529(2)   | C(15)-H(15B)    | 0.9800     |
| C(7)-H(7)        | 1.0000     | C(15)-H(15C)    | 0.9800     |
| C(8)-C(14)       | 1.320(3)   | O(3)-H(3)       | 0.8400     |
| C(8)-C(9)        | 1.488(3)   |                 |            |
| C(5)-C(1)-C(2)   | 102.79(14) | O(2)-C(3)-C(2)  | 125.74(17) |
| C(5)-C(1)-C(12)  | 115.01(14) | C(4)-C(3)-C(2)  | 107.98(15) |
| C(2)-C(1)-C(12)  | 112.37(15) | C(5)-C(4)-C(3)  | 109.69(17) |
| C(5)-C(1)-H(1)   | 108.8      | C(5)-C(4)-C(13) | 128.42(17) |
| C(2)-C(1)-H(1)   | 108.8      | C(3)-C(4)-C(13) | 121.86(16) |
| C(12)-C(1)-H(1)  | 108.8      | C(4)-C(5)-C(6)  | 123.08(16) |
| C(3)-C(2)-C(1)   | 106.20(15) | C(4)-C(5)-C(1)  | 113.23(16) |
| C(3)-C(2)-H(2A)  | 110.5      | C(6)-C(5)-C(1)  | 123.65(15) |
| C(1)-C(2)-H(2A)  | 110.5      | O(3)-C(6)-C(5)  | 108.13(14) |
| C(3)-C(2)-H(2B)  | 110.5      | O(3)-C(6)-C(7)  | 111.78(14) |
| C(1)-C(2)-H(2B)  | 110.5      | C(5)-C(6)-C(7)  | 112.80(15) |
| H(2A)-C(2)-H(2B) | 108.7      | O(3)-C(6)-H(6)  | 108.0      |
| O(2)-C(3)-C(4)   | 126.24(18) | C(5)-C(6)-H(6)  | 108.0      |

|                     |            |                     |            |
|---------------------|------------|---------------------|------------|
| C(7)-C(6)-H(6)      | 108.0      | H(13B)-C(13)-H(13C) | 109.5      |
| C(8)-C(7)-C(6)      | 115.03(15) | C(8)-C(14)-H(14A)   | 120.0      |
| C(8)-C(7)-C(10)     | 102.52(14) | C(8)-C(14)-H(14B)   | 120.0      |
| C(6)-C(7)-C(10)     | 113.49(14) | H(14A)-C(14)-H(14B) | 120.0      |
| C(8)-C(7)-H(7)      | 108.5      | C(12)-C(15)-H(15A)  | 109.5      |
| C(6)-C(7)-H(7)      | 108.5      | C(12)-C(15)-H(15B)  | 109.5      |
| C(10)-C(7)-H(7)     | 108.5      | H(15A)-C(15)-H(15B) | 109.5      |
| C(14)-C(8)-C(9)     | 123.56(18) | C(12)-C(15)-H(15C)  | 109.5      |
| C(14)-C(8)-C(7)     | 129.77(18) | H(15A)-C(15)-H(15C) | 109.5      |
| C(9)-C(8)-C(7)      | 106.68(16) | H(15B)-C(15)-H(15C) | 109.5      |
| O(4)-C(9)-O(1)      | 121.86(18) | C(9)-O(1)-C(10)     | 110.28(14) |
| O(4)-C(9)-C(8)      | 129.12(19) | C(6)-O(3)-H(3)      | 109.5      |
| O(1)-C(9)-C(8)      | 109.02(16) |                     |            |
| O(1)-C(10)-C(11)    | 108.87(15) |                     |            |
| O(1)-C(10)-C(7)     | 104.25(14) |                     |            |
| C(11)-C(10)-C(7)    | 115.55(14) |                     |            |
| O(1)-C(10)-H(10)    | 109.3      |                     |            |
| C(11)-C(10)-H(10)   | 109.3      |                     |            |
| C(7)-C(10)-H(10)    | 109.3      |                     |            |
| C(10)-C(11)-C(12)   | 113.30(15) |                     |            |
| C(10)-C(11)-H(11A)  | 108.9      |                     |            |
| C(12)-C(11)-H(11A)  | 108.9      |                     |            |
| C(10)-C(11)-H(11B)  | 108.9      |                     |            |
| C(12)-C(11)-H(11B)  | 108.9      |                     |            |
| H(11A)-C(11)-H(11B) | 107.7      |                     |            |
| C(15)-C(12)-C(11)   | 111.65(15) |                     |            |
| C(15)-C(12)-C(1)    | 112.06(15) |                     |            |
| C(11)-C(12)-C(1)    | 113.37(15) |                     |            |
| C(15)-C(12)-H(12)   | 106.4      |                     |            |
| C(11)-C(12)-H(12)   | 106.4      |                     |            |
| C(1)-C(12)-H(12)    | 106.4      |                     |            |
| C(4)-C(13)-H(13A)   | 109.5      |                     |            |
| C(4)-C(13)-H(13B)   | 109.5      |                     |            |
| H(13A)-C(13)-H(13B) | 109.5      |                     |            |
| C(4)-C(13)-H(13C)   | 109.5      |                     |            |
| H(13A)-C(13)-H(13C) | 109.5      |                     |            |

---

Symmetry transformations used to generate equivalent atoms:



Table 4. Anisotropic displacement parameters ( $\text{\AA}^2 \times 10^3$ ) for maimone80. The anisotropic displacement factor exponent takes the form:  $-2\pi^2[ h^2 a^{*2} U^{11} + \dots + 2 h k a^* b^* U^{12} ]$

|       | U <sup>11</sup> | U <sup>22</sup> | U <sup>33</sup> | U <sup>23</sup> | U <sup>13</sup> | U <sup>12</sup> |
|-------|-----------------|-----------------|-----------------|-----------------|-----------------|-----------------|
| C(1)  | 19(1)           | 20(1)           | 17(1)           | -2(1)           | 0(1)            | 1(1)            |
| C(2)  | 24(1)           | 24(1)           | 19(1)           | -2(1)           | 2(1)            | 4(1)            |
| C(3)  | 16(1)           | 25(1)           | 19(1)           | 0(1)            | -2(1)           | -1(1)           |
| C(4)  | 15(1)           | 24(1)           | 19(1)           | -1(1)           | -1(1)           | 1(1)            |
| C(5)  | 14(1)           | 22(1)           | 19(1)           | -1(1)           | -3(1)           | 0(1)            |
| C(6)  | 16(1)           | 20(1)           | 18(1)           | 0(1)            | -1(1)           | 0(1)            |
| C(7)  | 18(1)           | 20(1)           | 18(1)           | -1(1)           | 0(1)            | -1(1)           |
| C(8)  | 21(1)           | 23(1)           | 18(1)           | -1(1)           | 0(1)            | -6(1)           |
| C(9)  | 23(1)           | 22(1)           | 21(1)           | -1(1)           | -1(1)           | -7(1)           |
| C(10) | 20(1)           | 20(1)           | 17(1)           | 3(1)            | -1(1)           | -4(1)           |
| C(11) | 21(1)           | 18(1)           | 22(1)           | 2(1)            | -3(1)           | 1(1)            |
| C(12) | 20(1)           | 19(1)           | 21(1)           | 0(1)            | -2(1)           | 3(1)            |
| C(13) | 27(1)           | 22(1)           | 22(1)           | 4(1)            | 2(1)            | 3(1)            |
| C(14) | 24(1)           | 35(1)           | 25(1)           | 2(1)            | 7(1)            | 1(1)            |
| C(15) | 18(1)           | 25(1)           | 27(1)           | 1(1)            | 0(1)            | 1(1)            |
| O(1)  | 25(1)           | 26(1)           | 18(1)           | 5(1)            | -1(1)           | -2(1)           |
| O(2)  | 26(1)           | 31(1)           | 21(1)           | 4(1)            | 6(1)            | 2(1)            |
| O(3)  | 25(1)           | 19(1)           | 21(1)           | -4(1)           | 3(1)            | -1(1)           |
| O(4)  | 32(1)           | 33(1)           | 20(1)           | 4(1)            | 3(1)            | -5(1)           |

Table 5. Hydrogen coordinates ( $\times 10^4$ ) and isotropic displacement parameters ( $\text{\AA}^2 \times 10^3$ ) for maimone80.

|        | x     | y     | z    | U(eq) |
|--------|-------|-------|------|-------|
| H(1)   | 7449  | 8919  | 4044 | 22    |
| H(2A)  | 6484  | 8706  | 5551 | 27    |
| H(2B)  | 4968  | 8338  | 5056 | 27    |
| H(6)   | 9117  | 6277  | 3129 | 22    |
| H(7)   | 8818  | 8500  | 2631 | 22    |
| H(10)  | 6441  | 7502  | 1527 | 23    |
| H(11A) | 5459  | 9612  | 1808 | 25    |
| H(11B) | 6860  | 10009 | 2425 | 25    |
| H(12)  | 5022  | 9495  | 3539 | 24    |
| H(13A) | 6589  | 4112  | 4517 | 35    |
| H(13B) | 7859  | 4492  | 5268 | 35    |
| H(13C) | 8133  | 4473  | 4080 | 35    |
| H(14A) | 11116 | 6759  | 690  | 33    |
| H(14B) | 10898 | 6342  | 1875 | 33    |
| H(15A) | 4843  | 6992  | 2620 | 35    |
| H(15B) | 3633  | 8093  | 2602 | 35    |
| H(15C) | 4020  | 7371  | 3634 | 35    |
| H(3)   | 8074  | 5185  | 1996 | 32    |

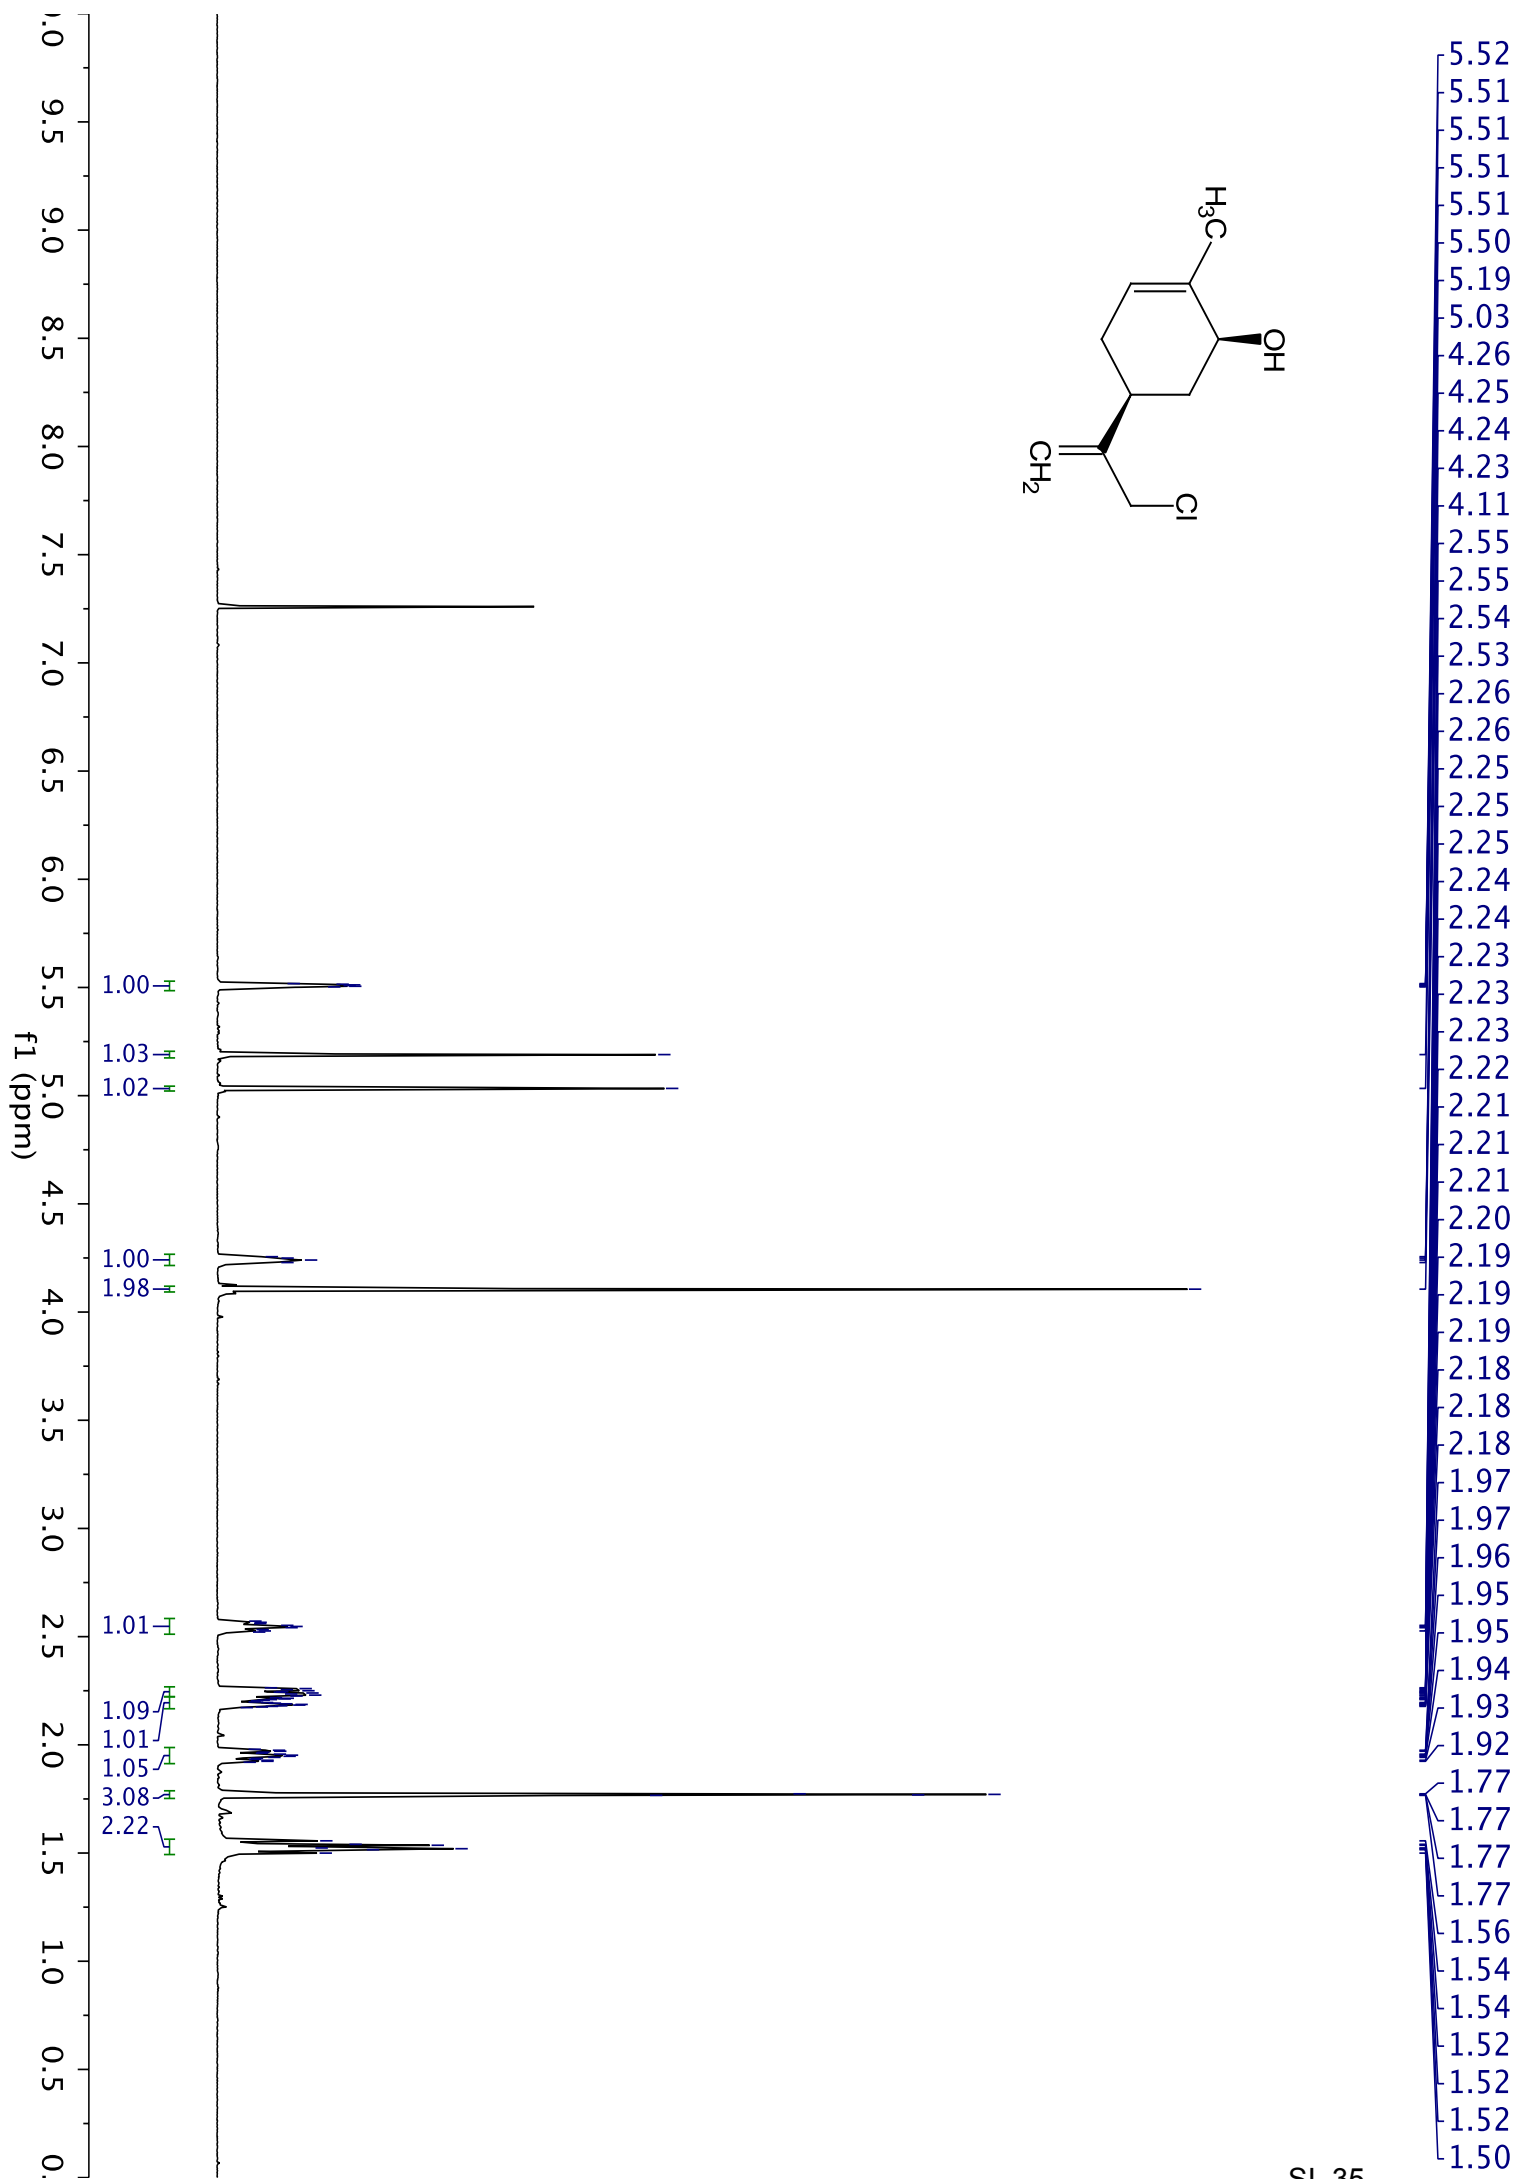

NAME xh\_5-chlorocarveol6\_c

EXPNO 1  
PROCNO 1  
Date\_ 20160930  
Time 13.00  
INSTRUM DRX-500  
PROBHD 5 mm BBO BB-1H  
PULPROG zgpg30  
TD 65536  
SOLVENT CDCl3  
NS 247  
DS 0  
SWH 30303.031 Hz  
FIDRES 0.462388 Hz  
AQ 1.0813940 sec  
RG 8192  
DM 16.500 usec  
DE 6.00 usec  
TE 296.7 K  
D1 2.0000000 sec  
d11 0.0300000 sec  
DELTA 1.8999998 sec  
TD0 70

==== CHANNEL f1 =====  
NUC1 13C  
P1 9.00 usec  
PL1 0.00 dB  
SFO1 125.6634855 MHz

==== CHANNEL f2 =====  
CPDPRG2 waltz16  
NUC2 1H  
PCPD2 100.00 usec  
PL2 -5.00 dB  
PL12 12.56 dB  
PL13 22.00 dB  
SFO2 499.7021541 MHz  
SI 131072  
SF 125.6496517 MHz  
MDW EM  
SSB 0  
LB 0.75 Hz  
GB 0  
PC 4.00

148.63  
136.42  
123.59  
113.88  
77.41  
77.16  
76.91  
70.86  
47.56  
38.09  
35.94  
31.49  
19.05

220 210 200 190 180 170 160 150 140 130 120 110 100 90 80 70 60 50 40 30 20 10 0 ppm

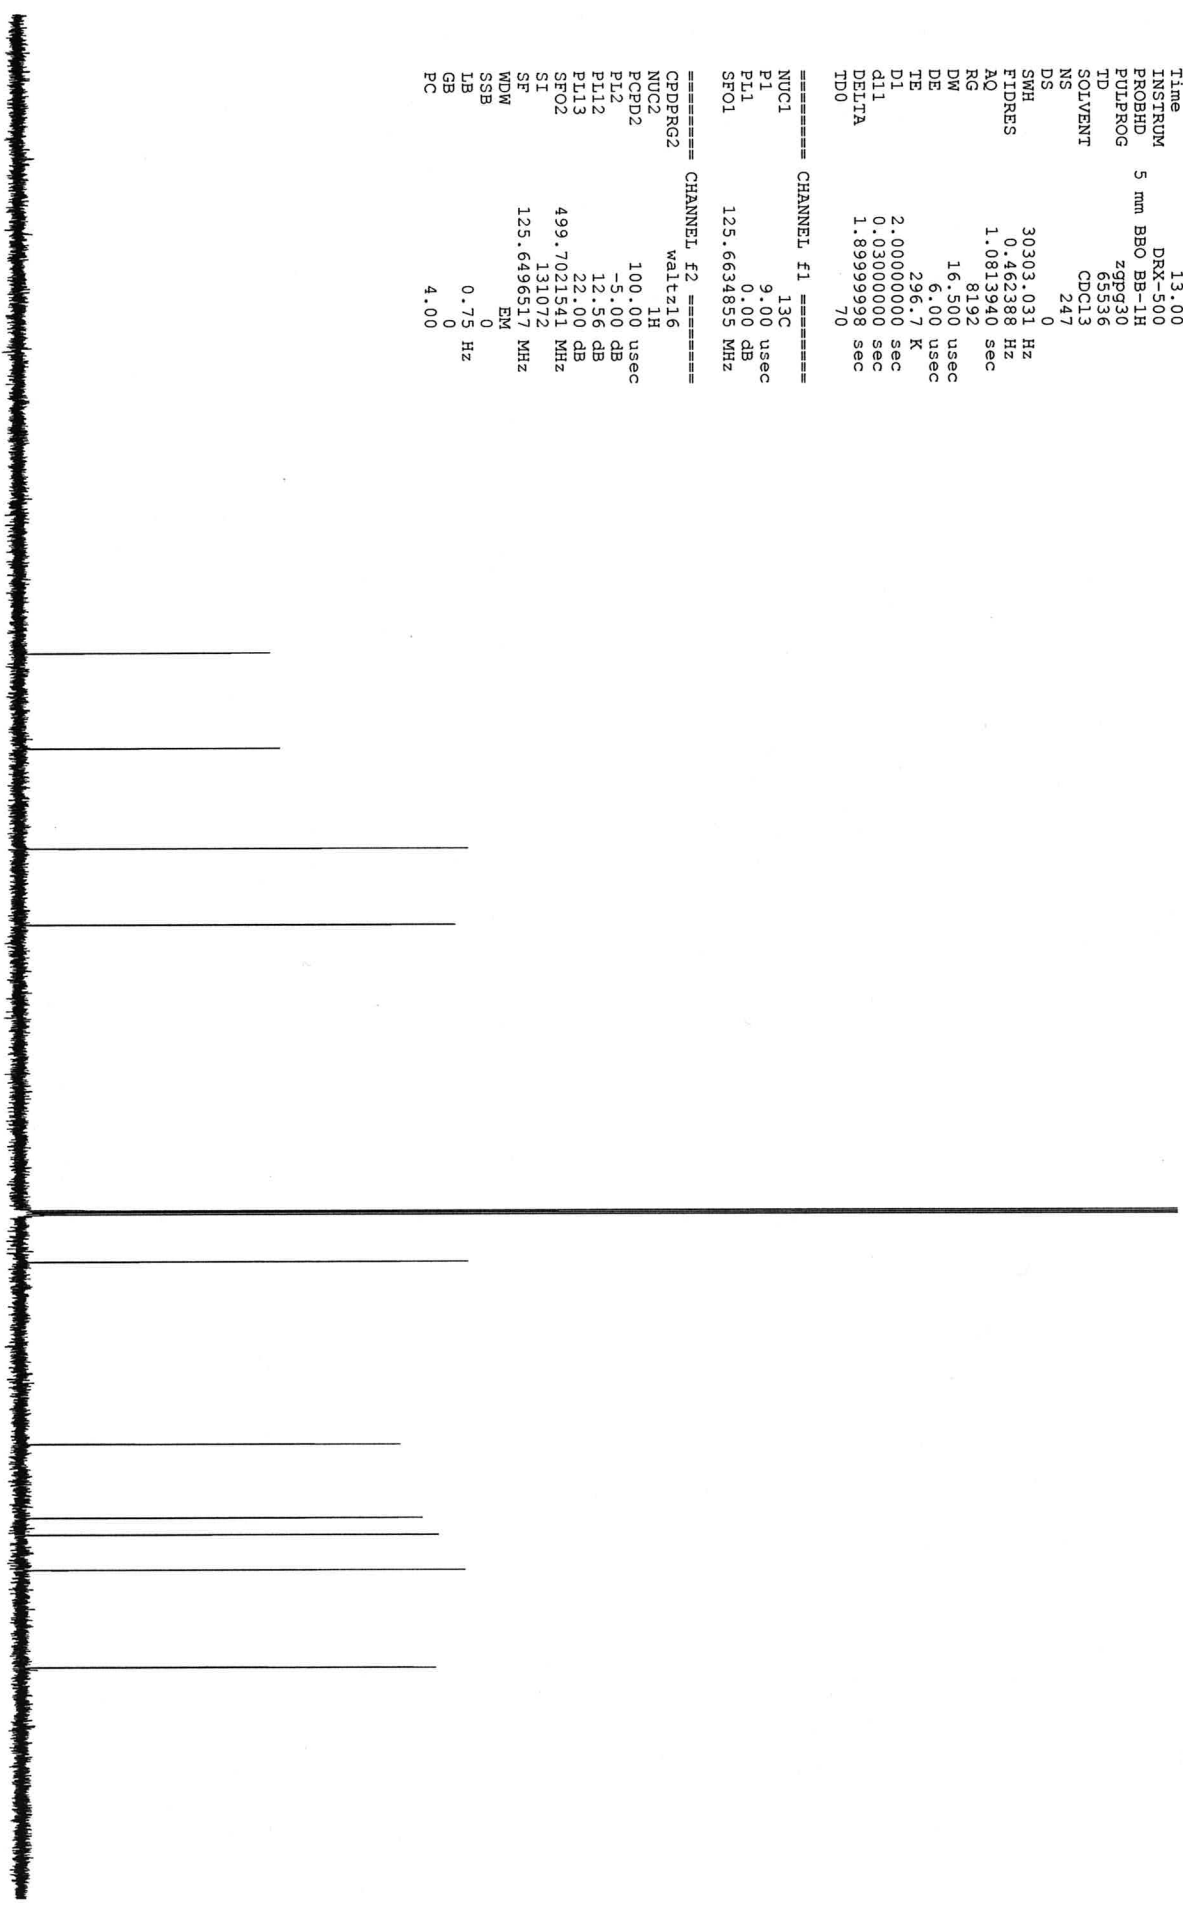

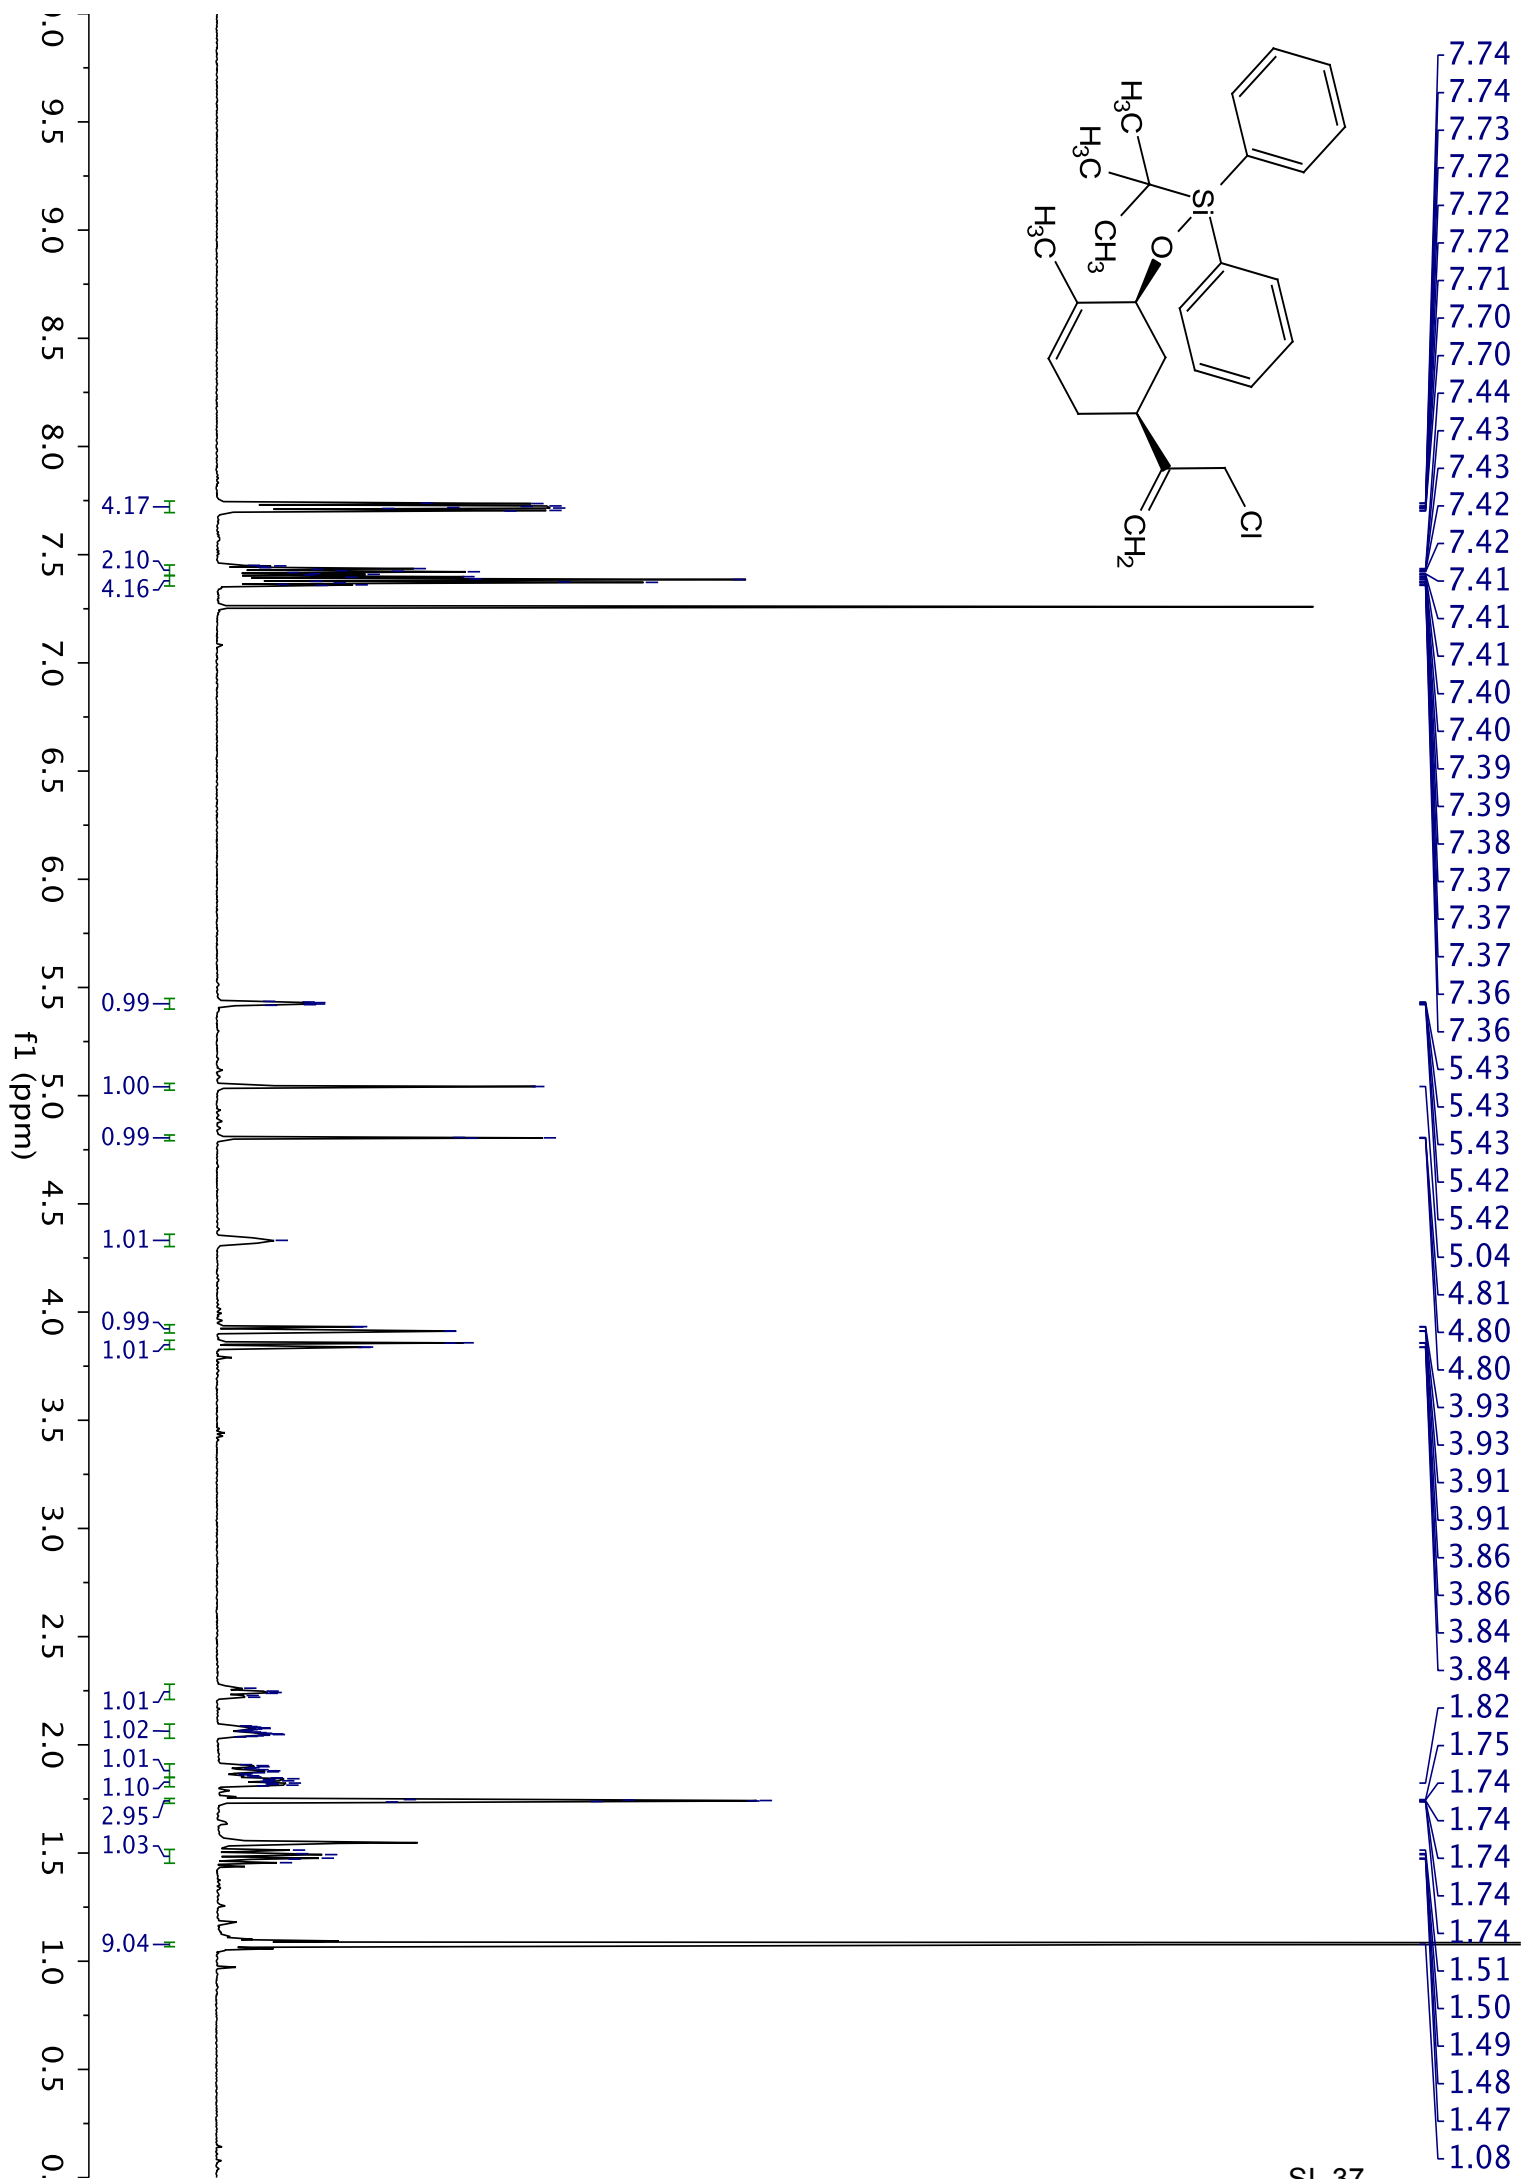

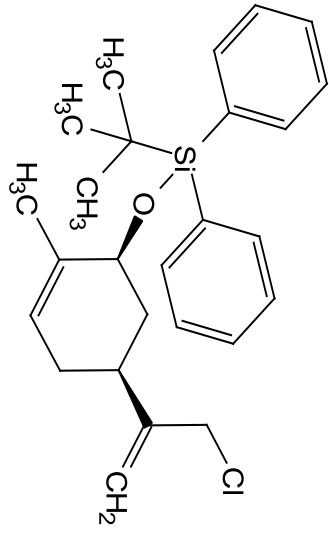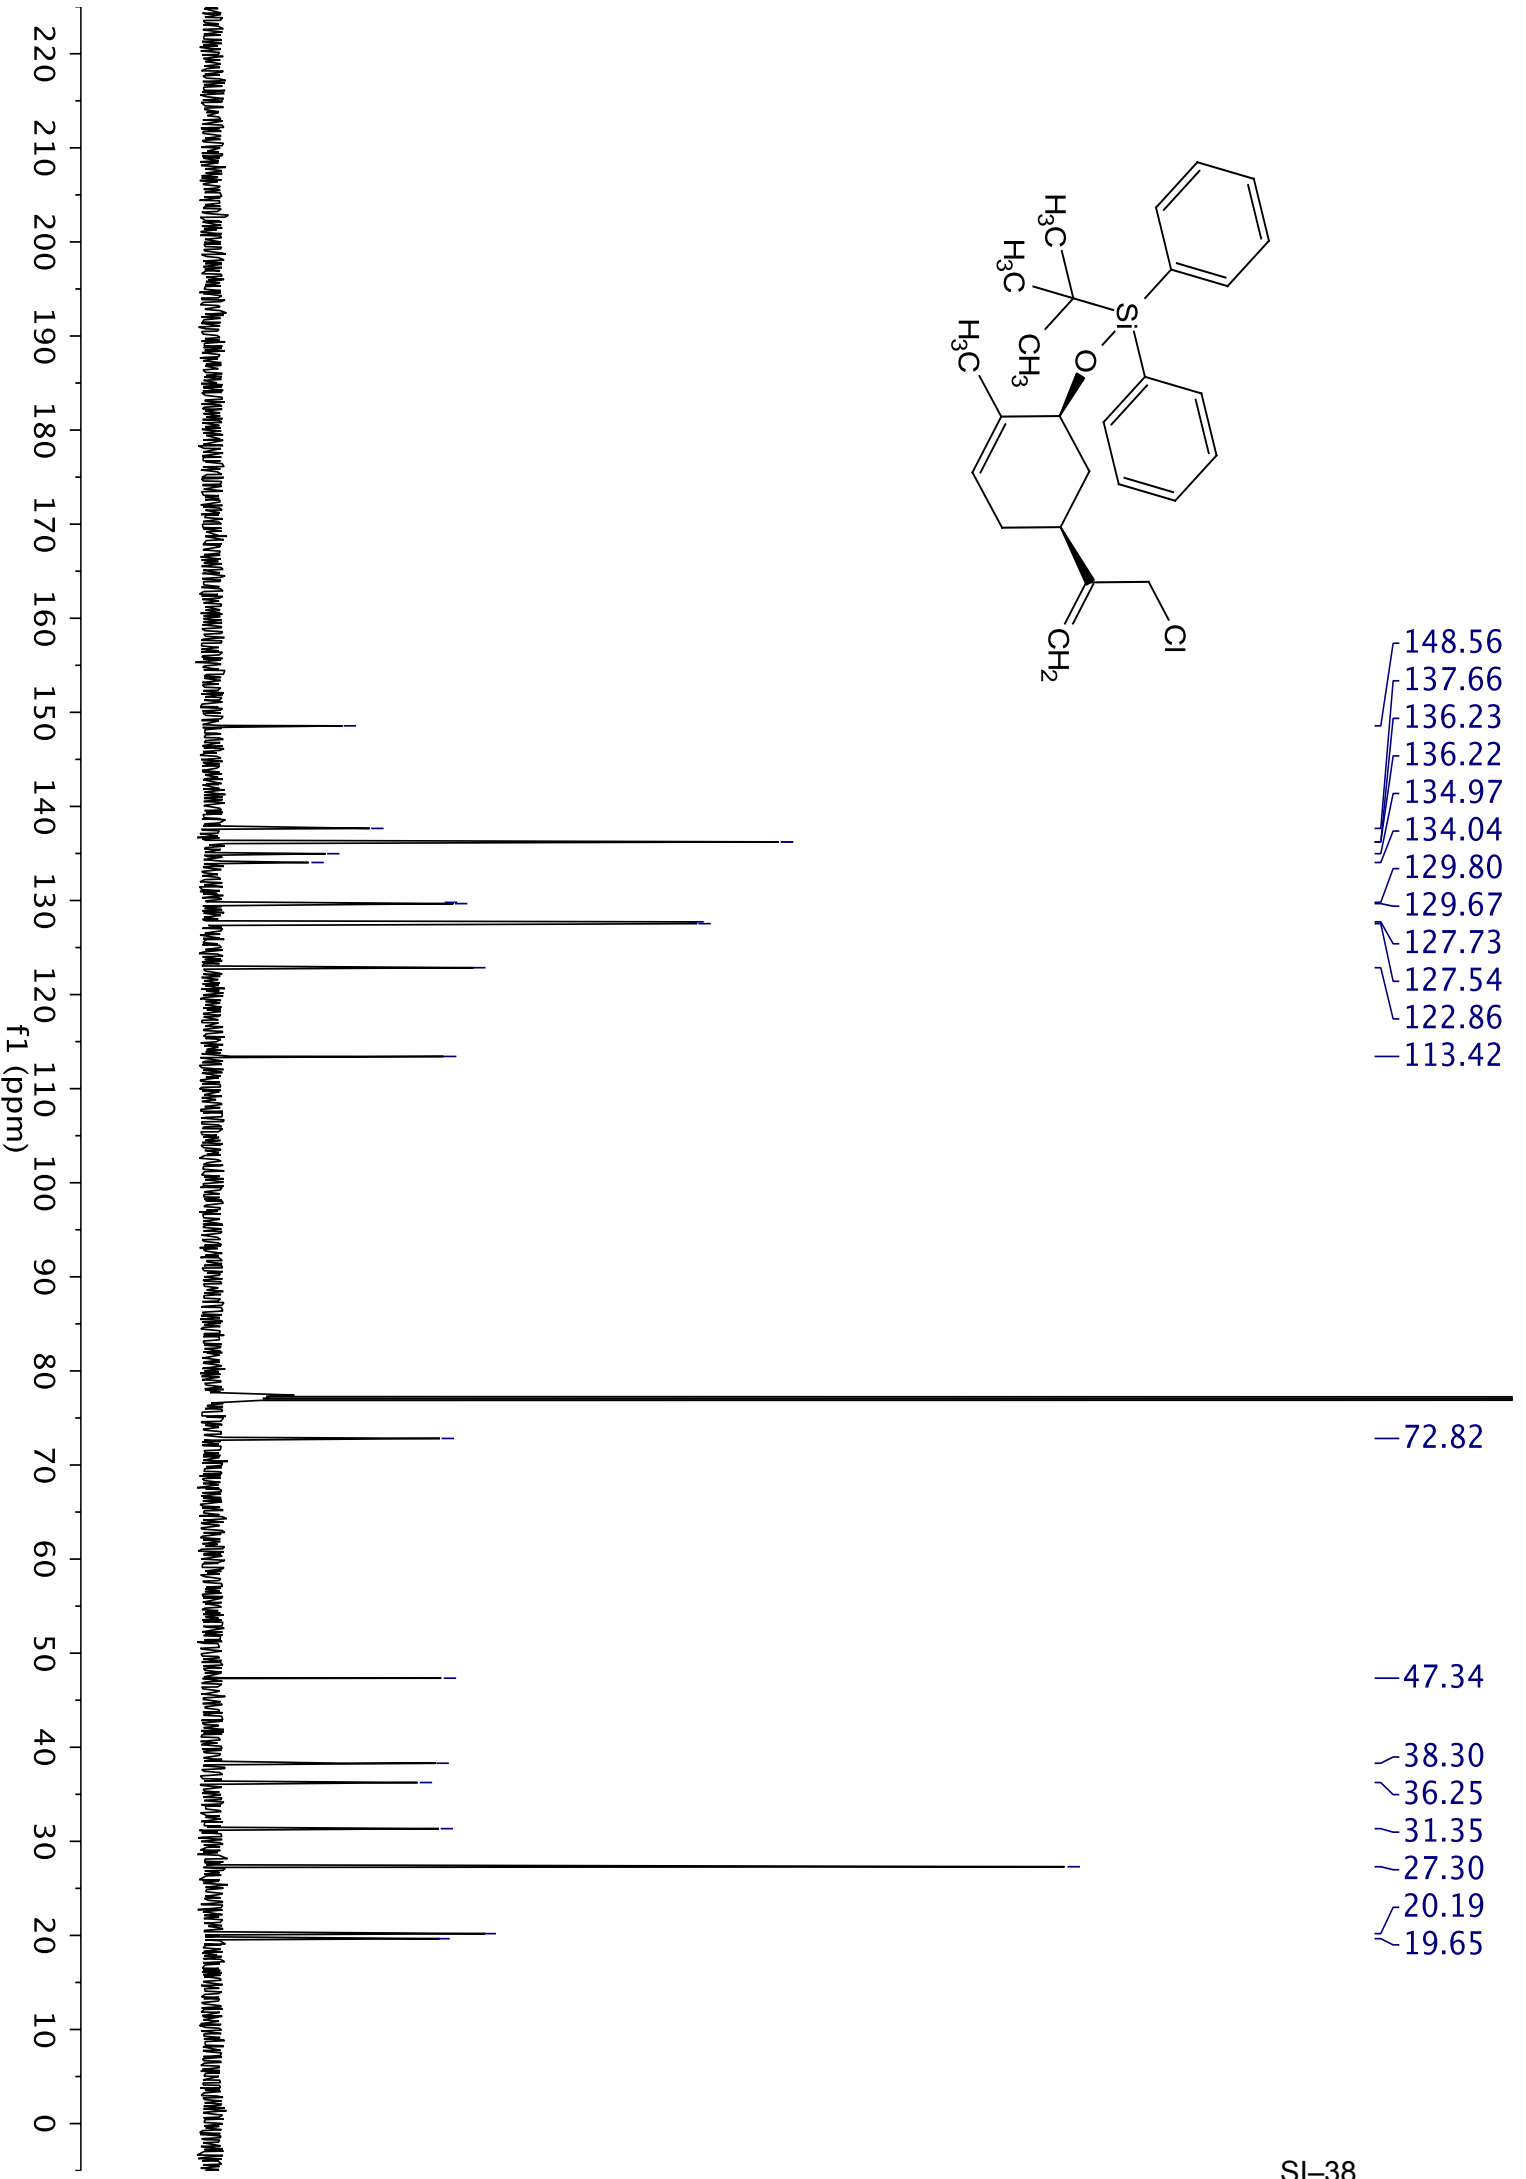

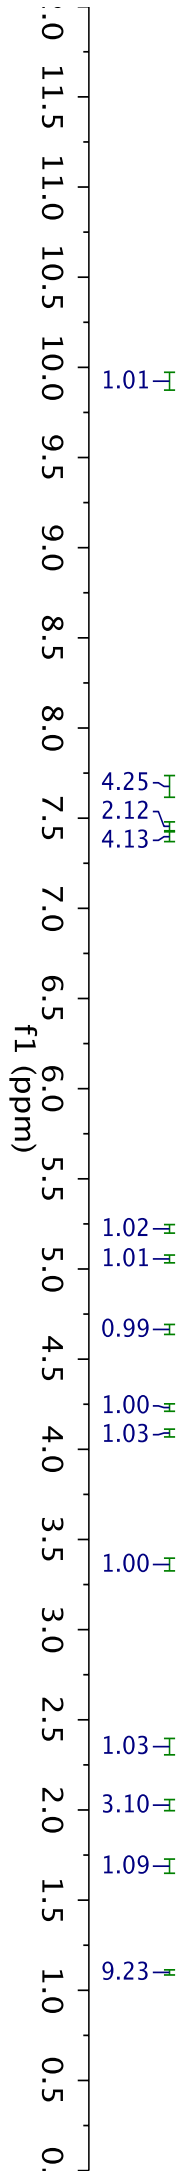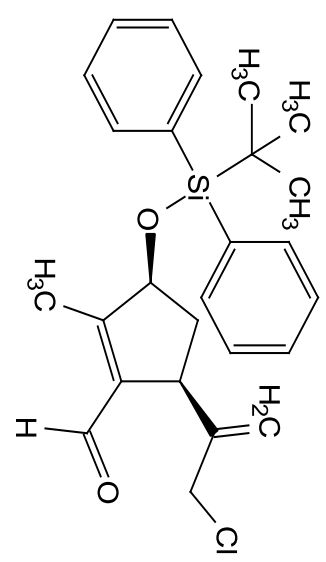

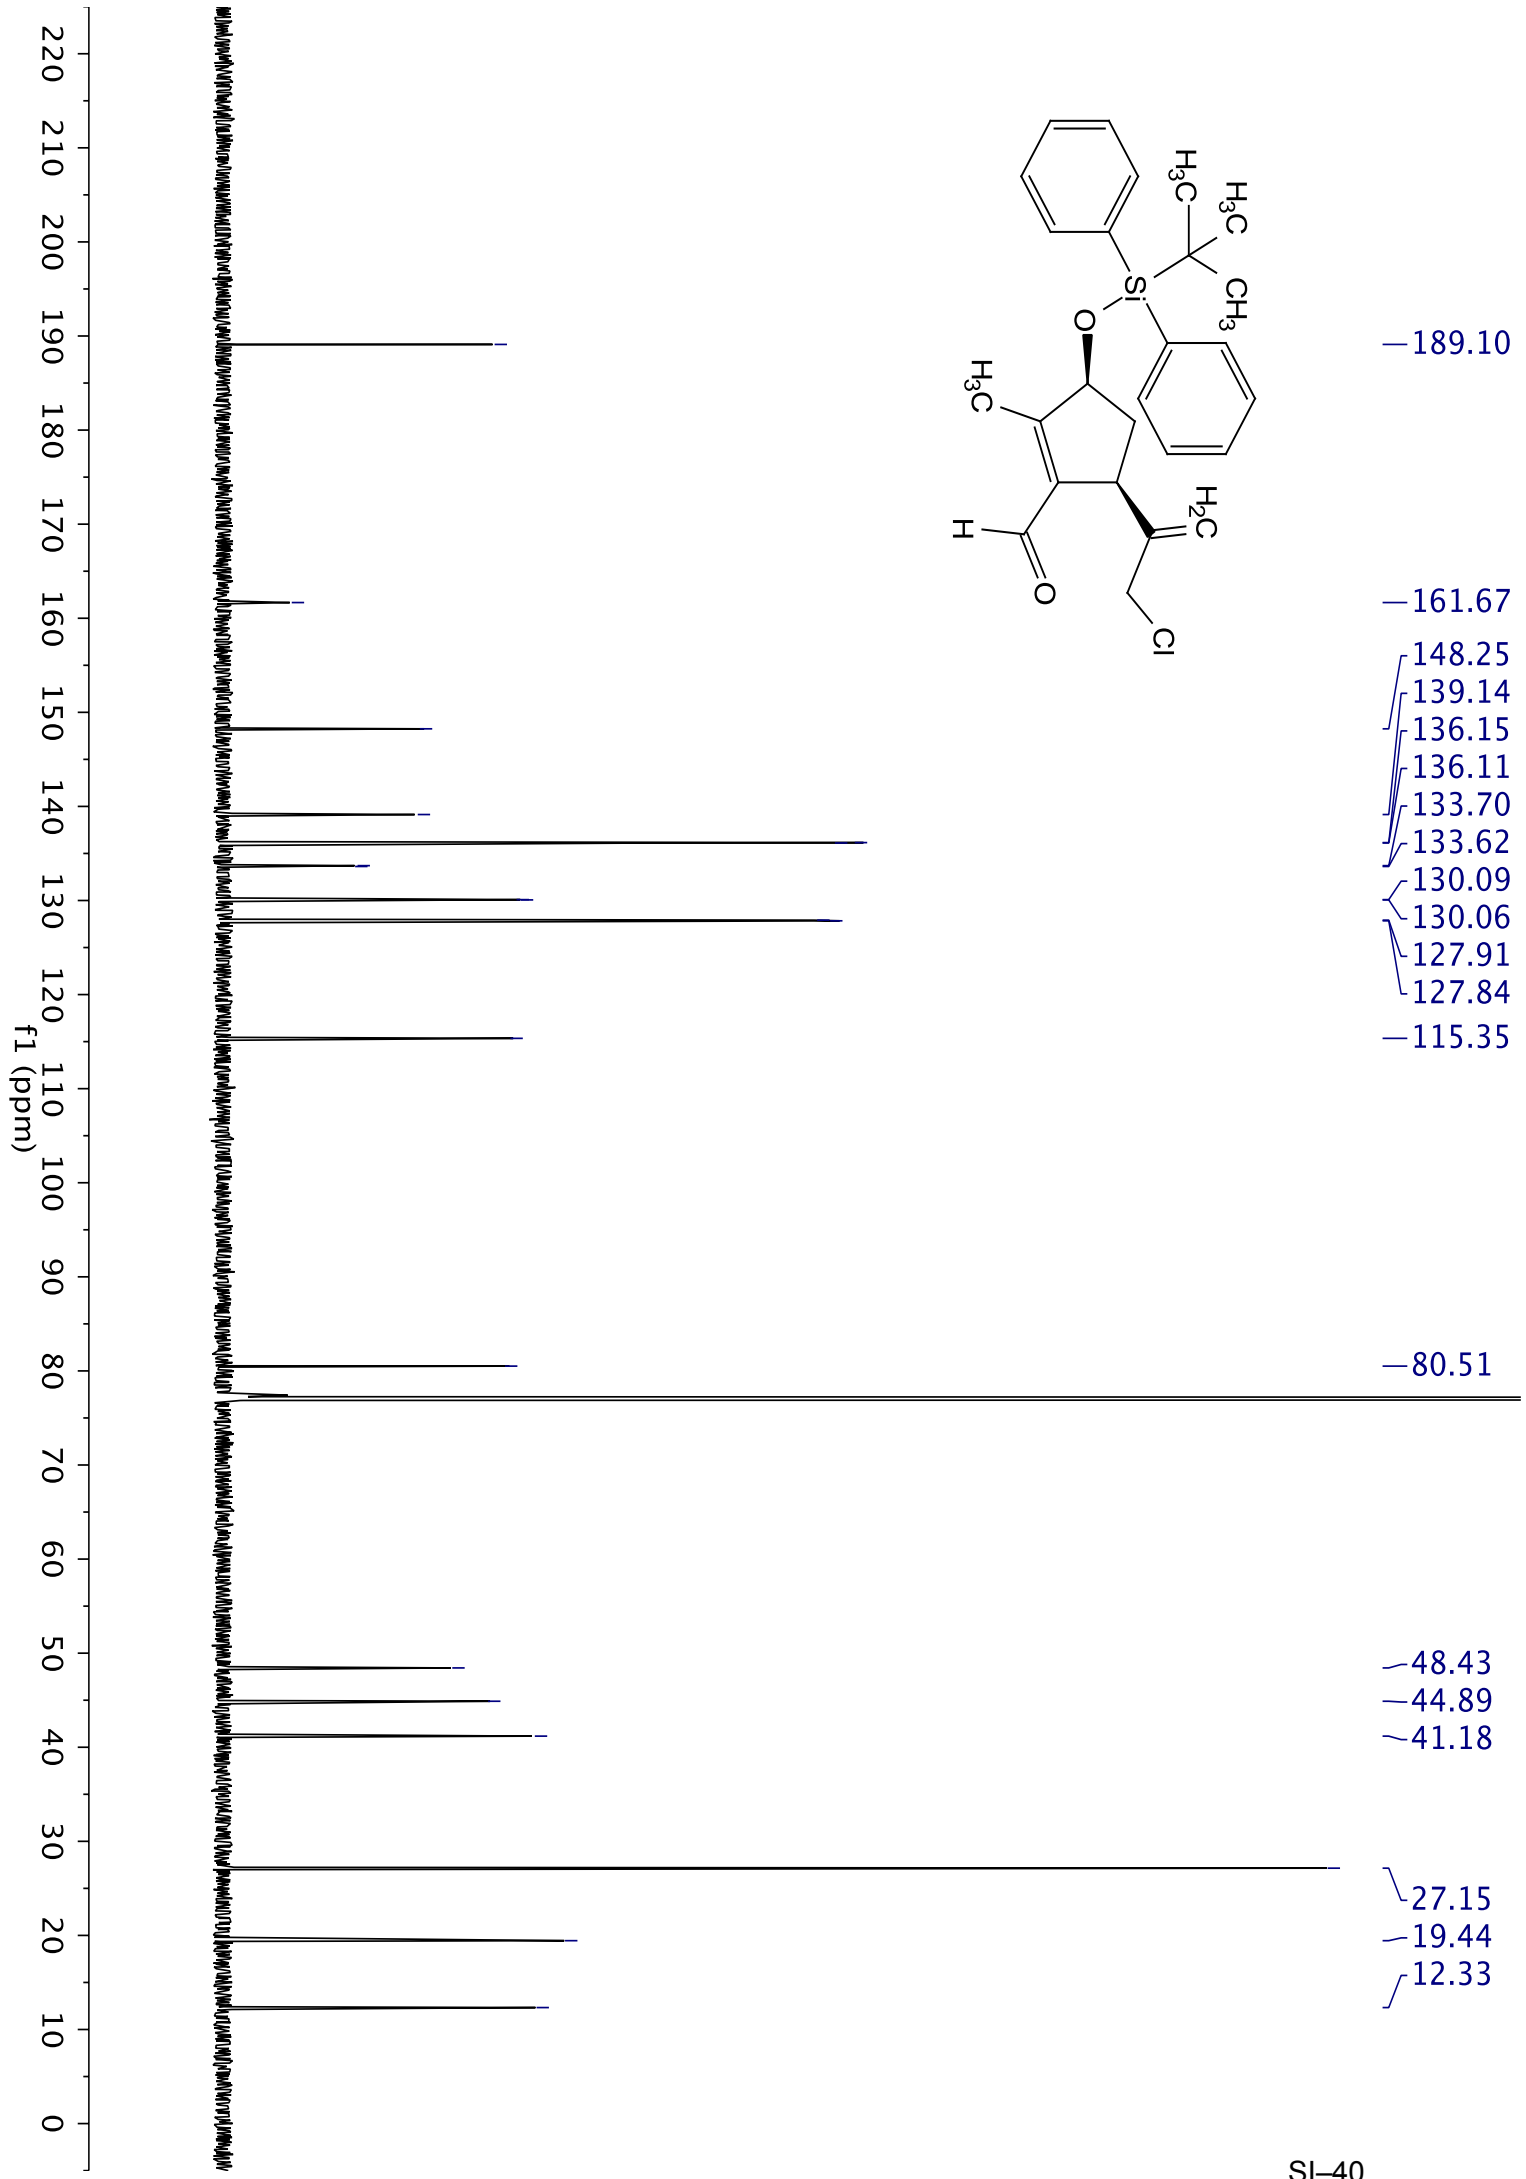



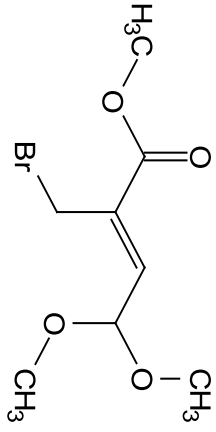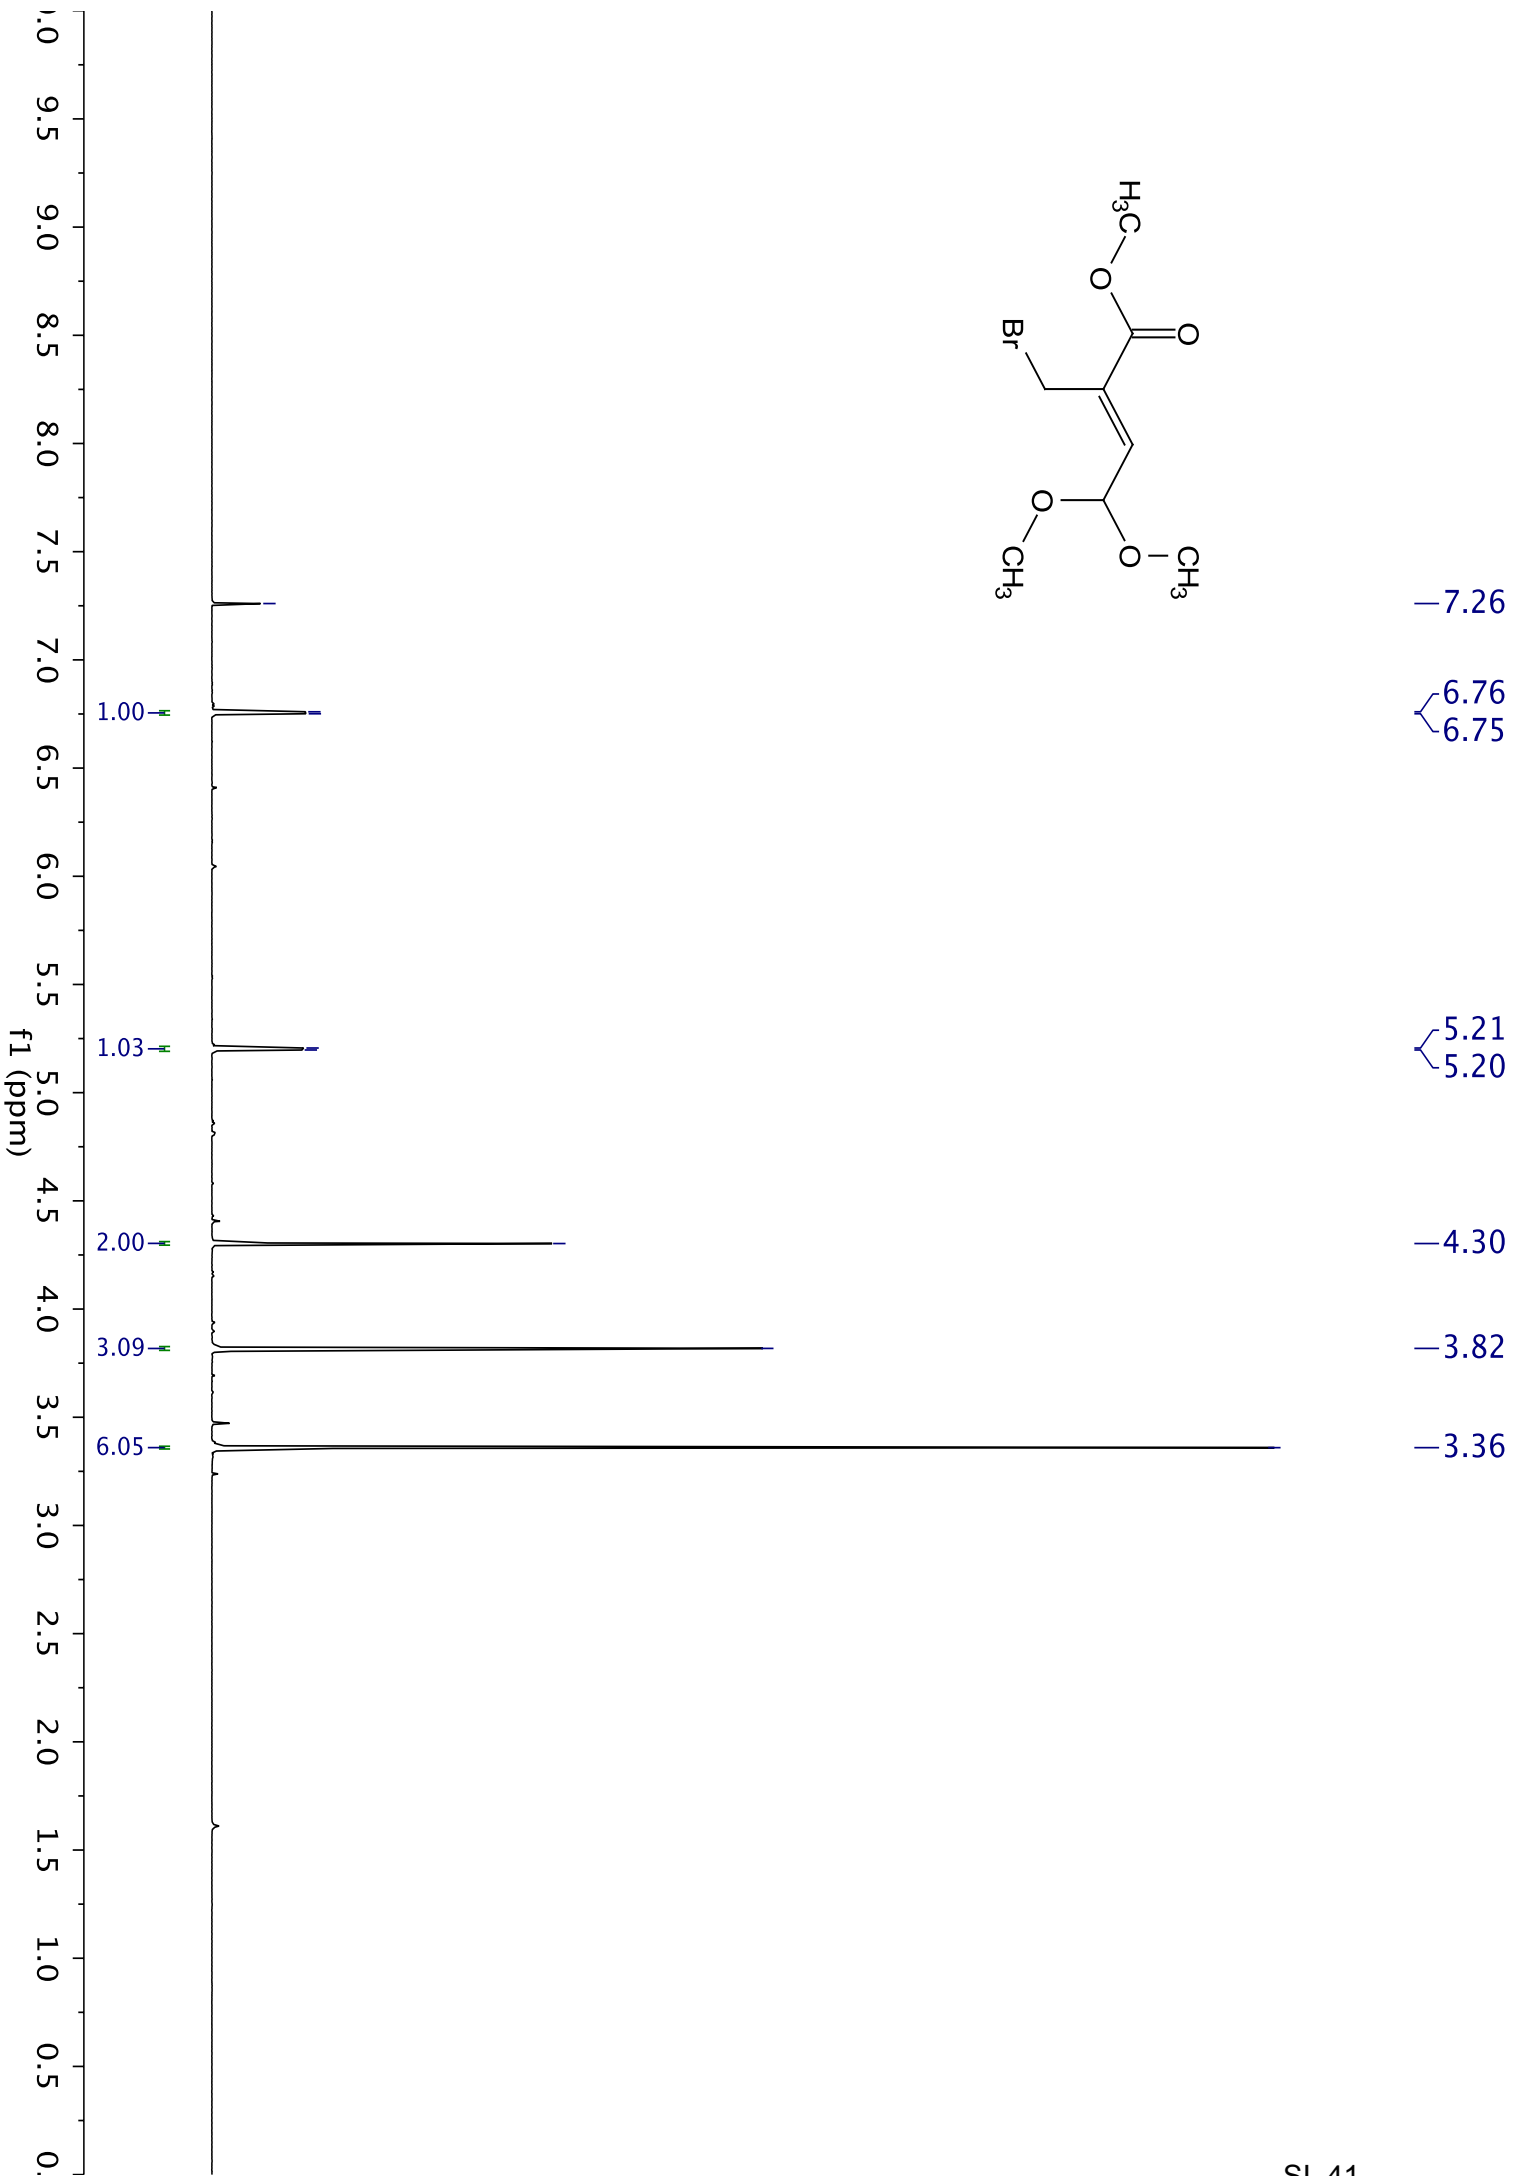

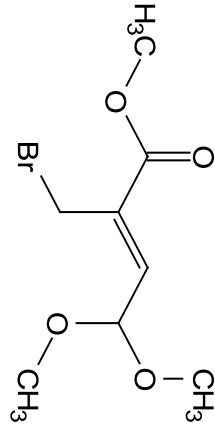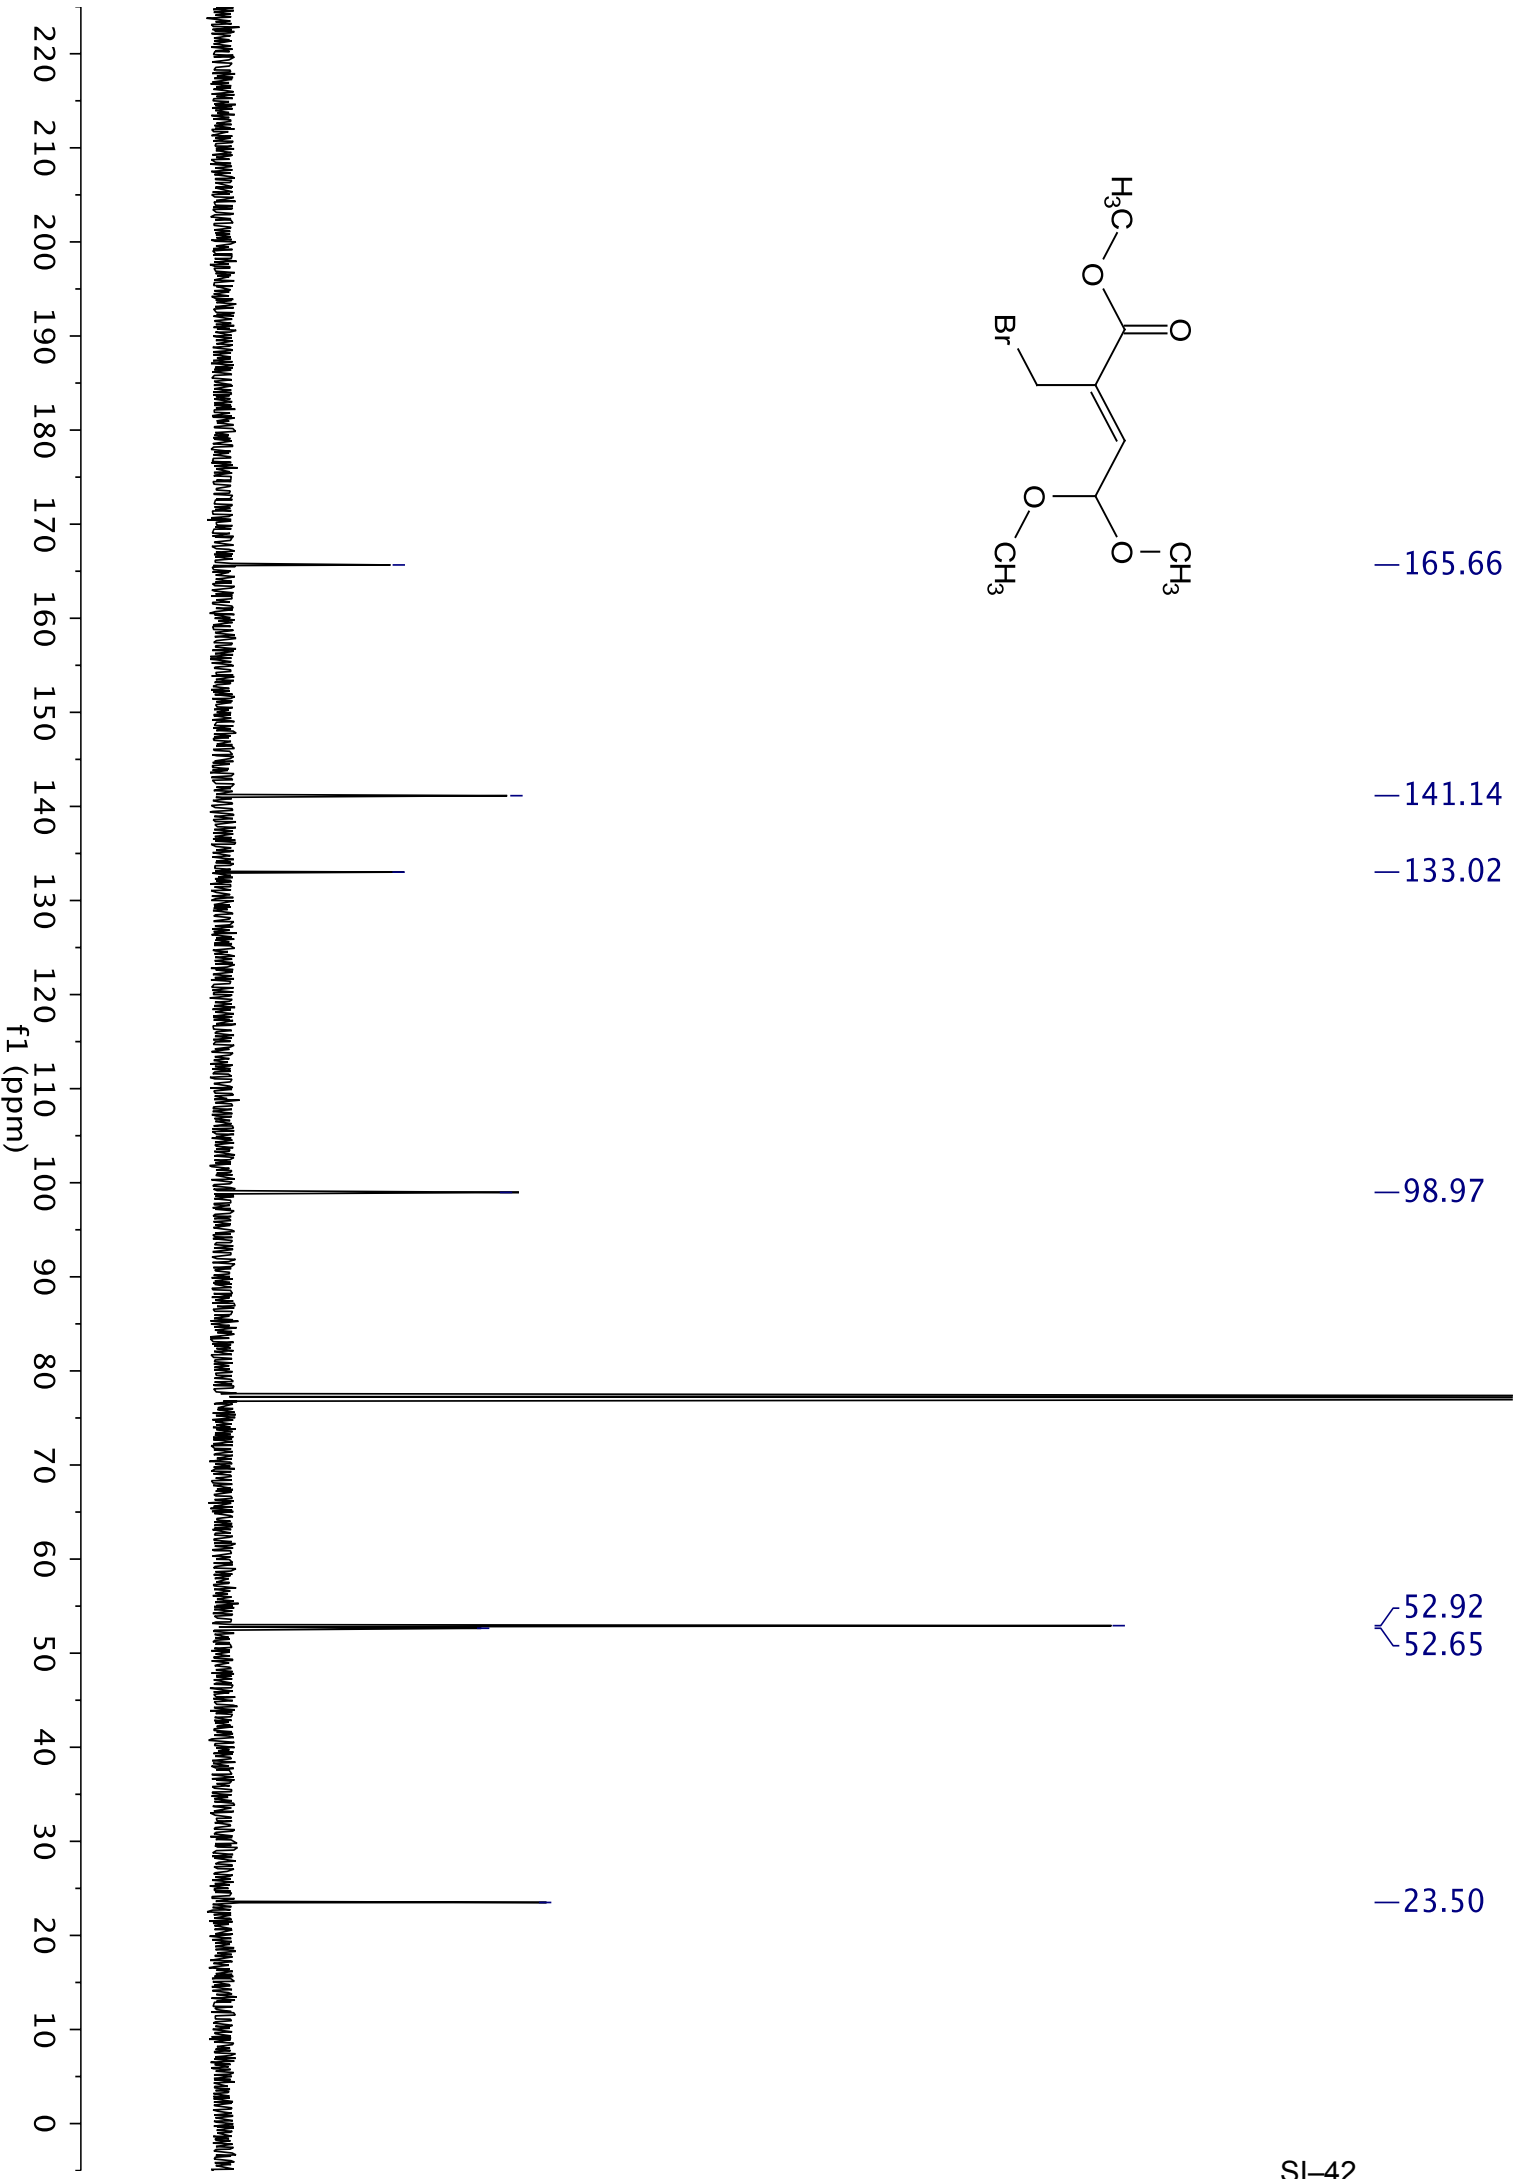

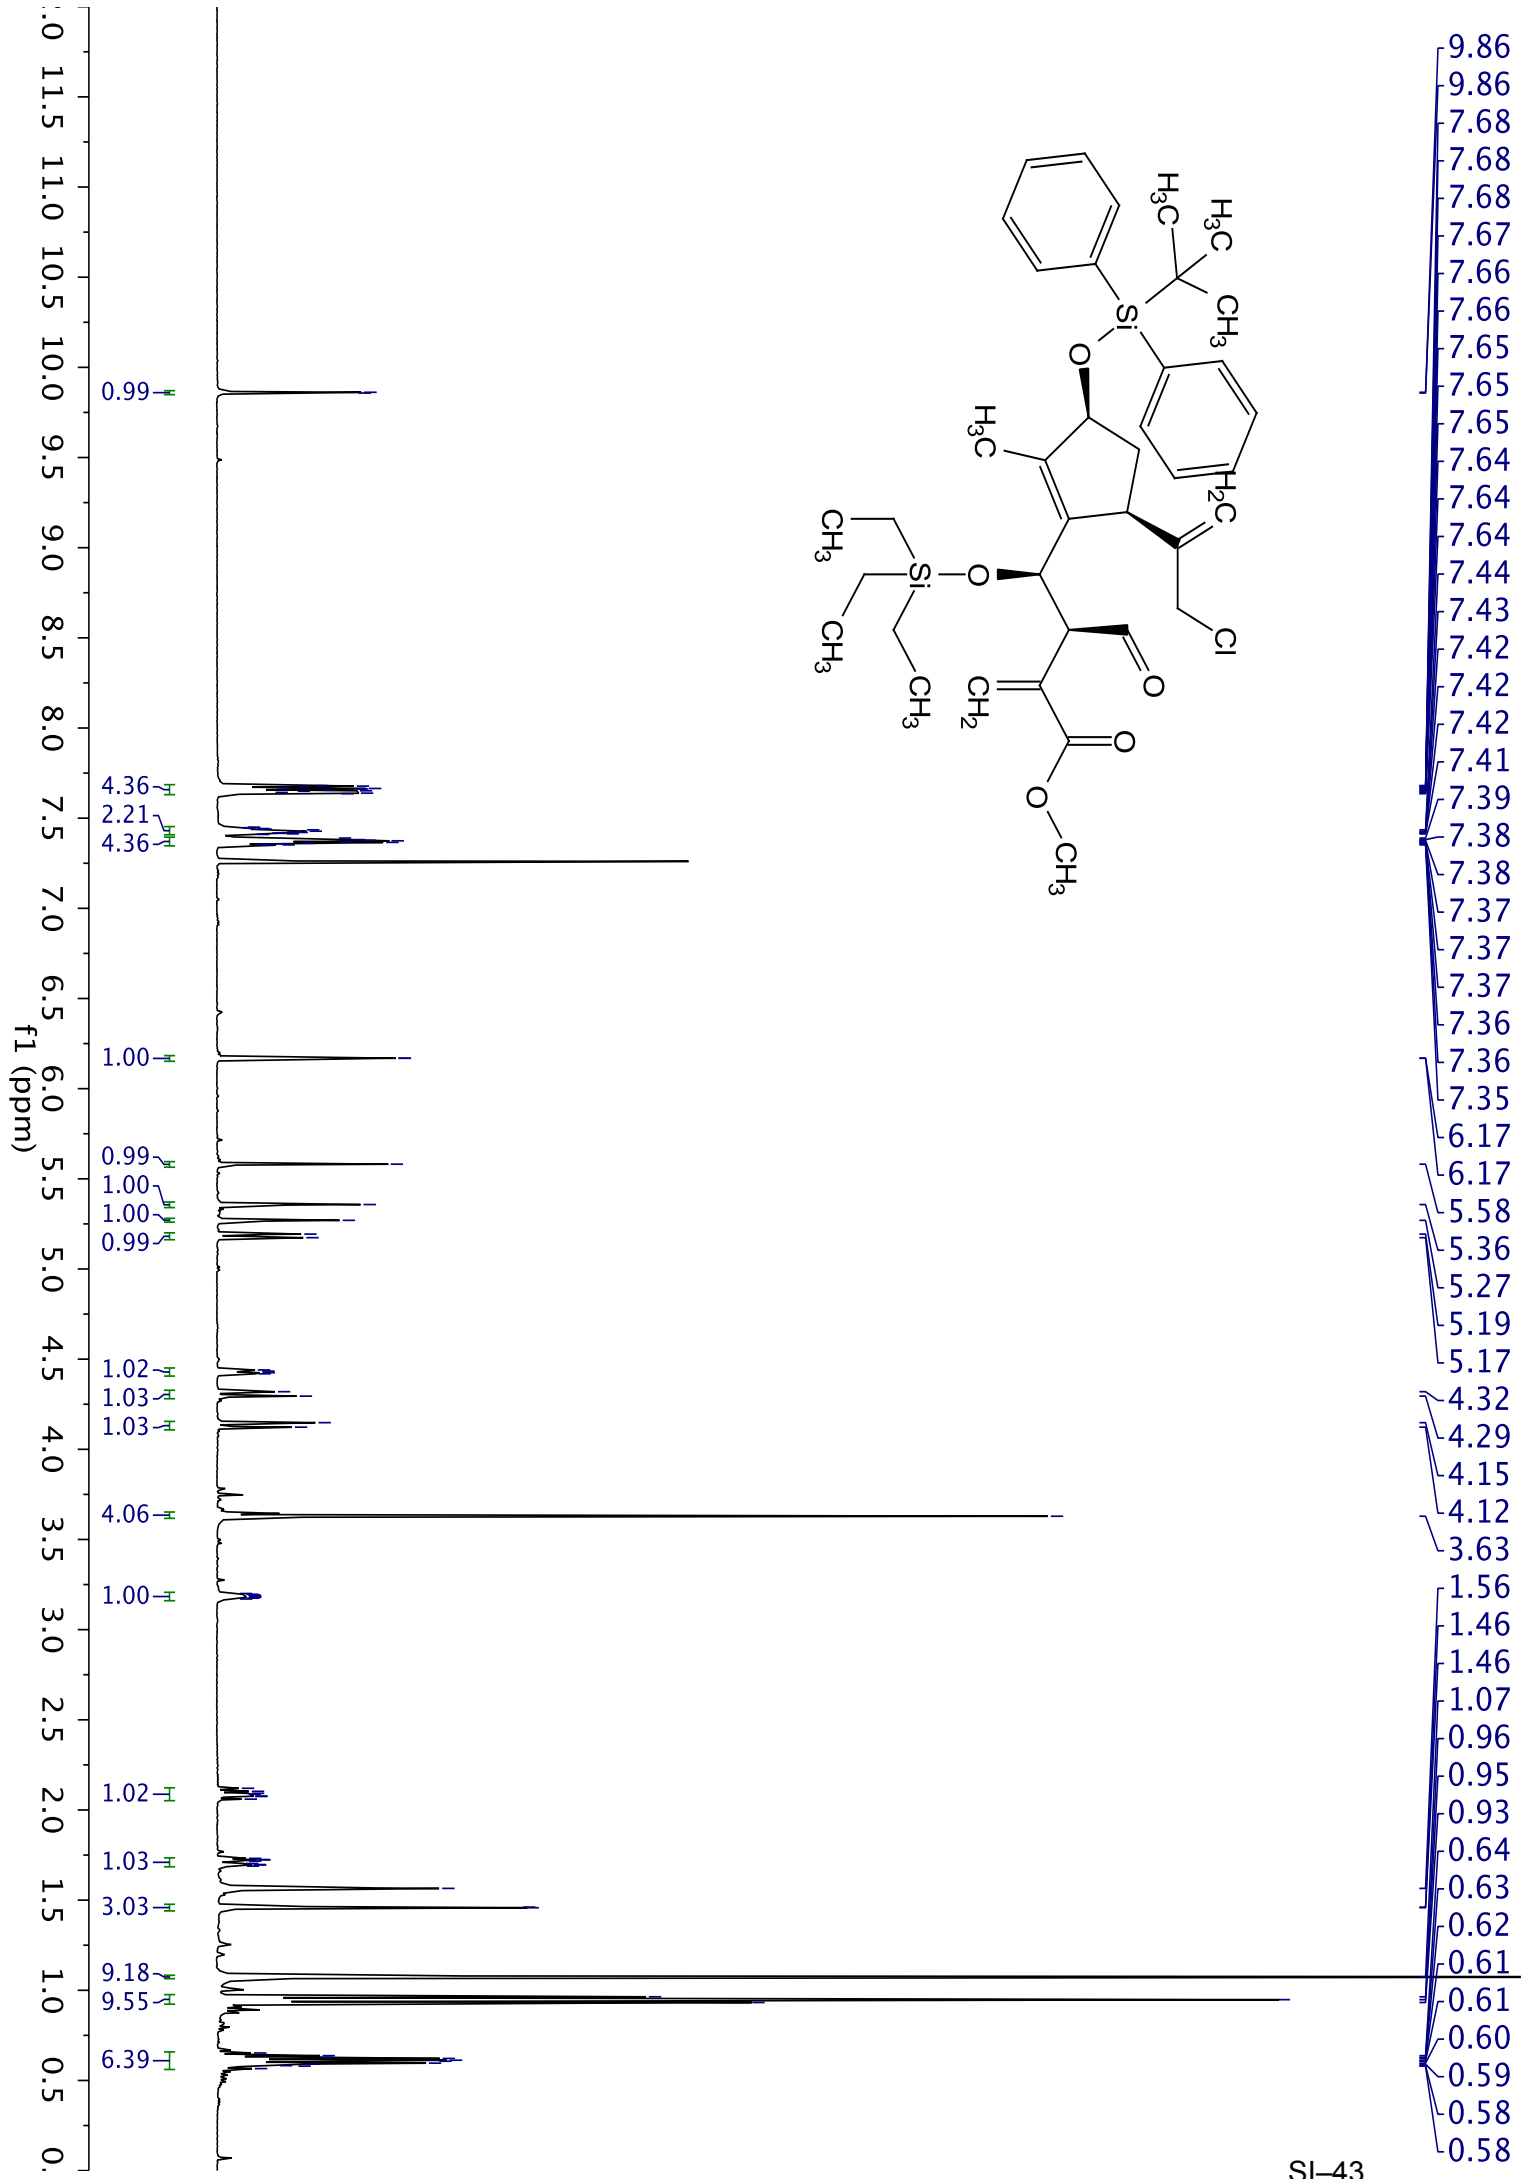





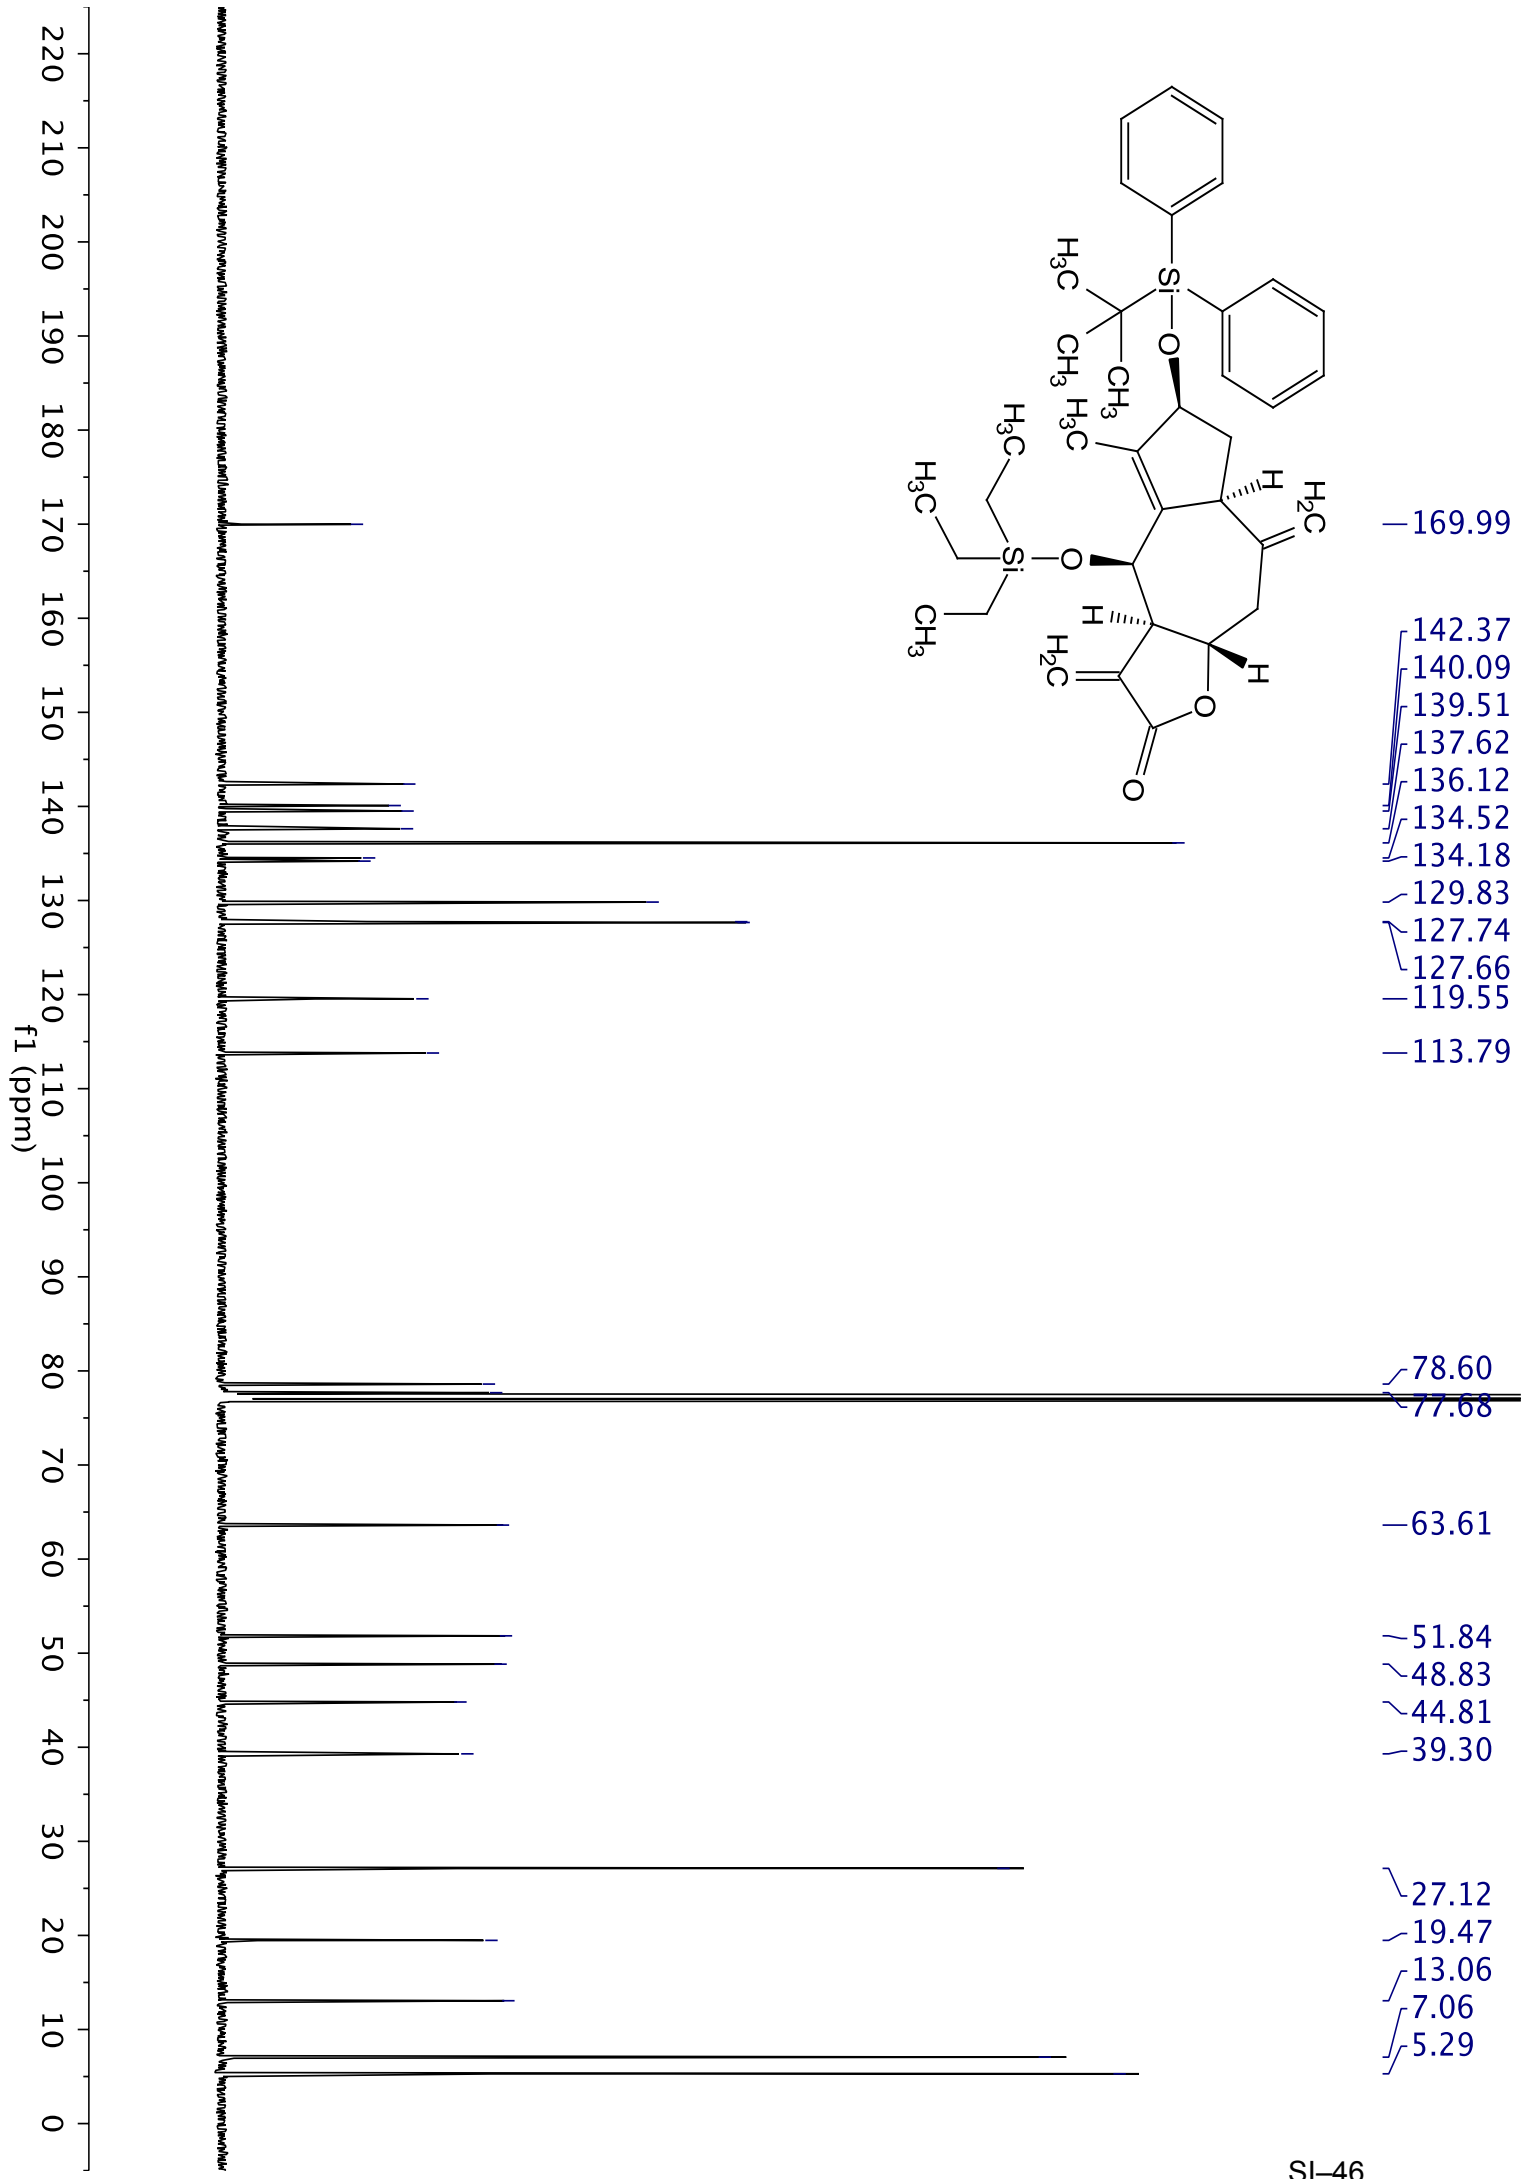







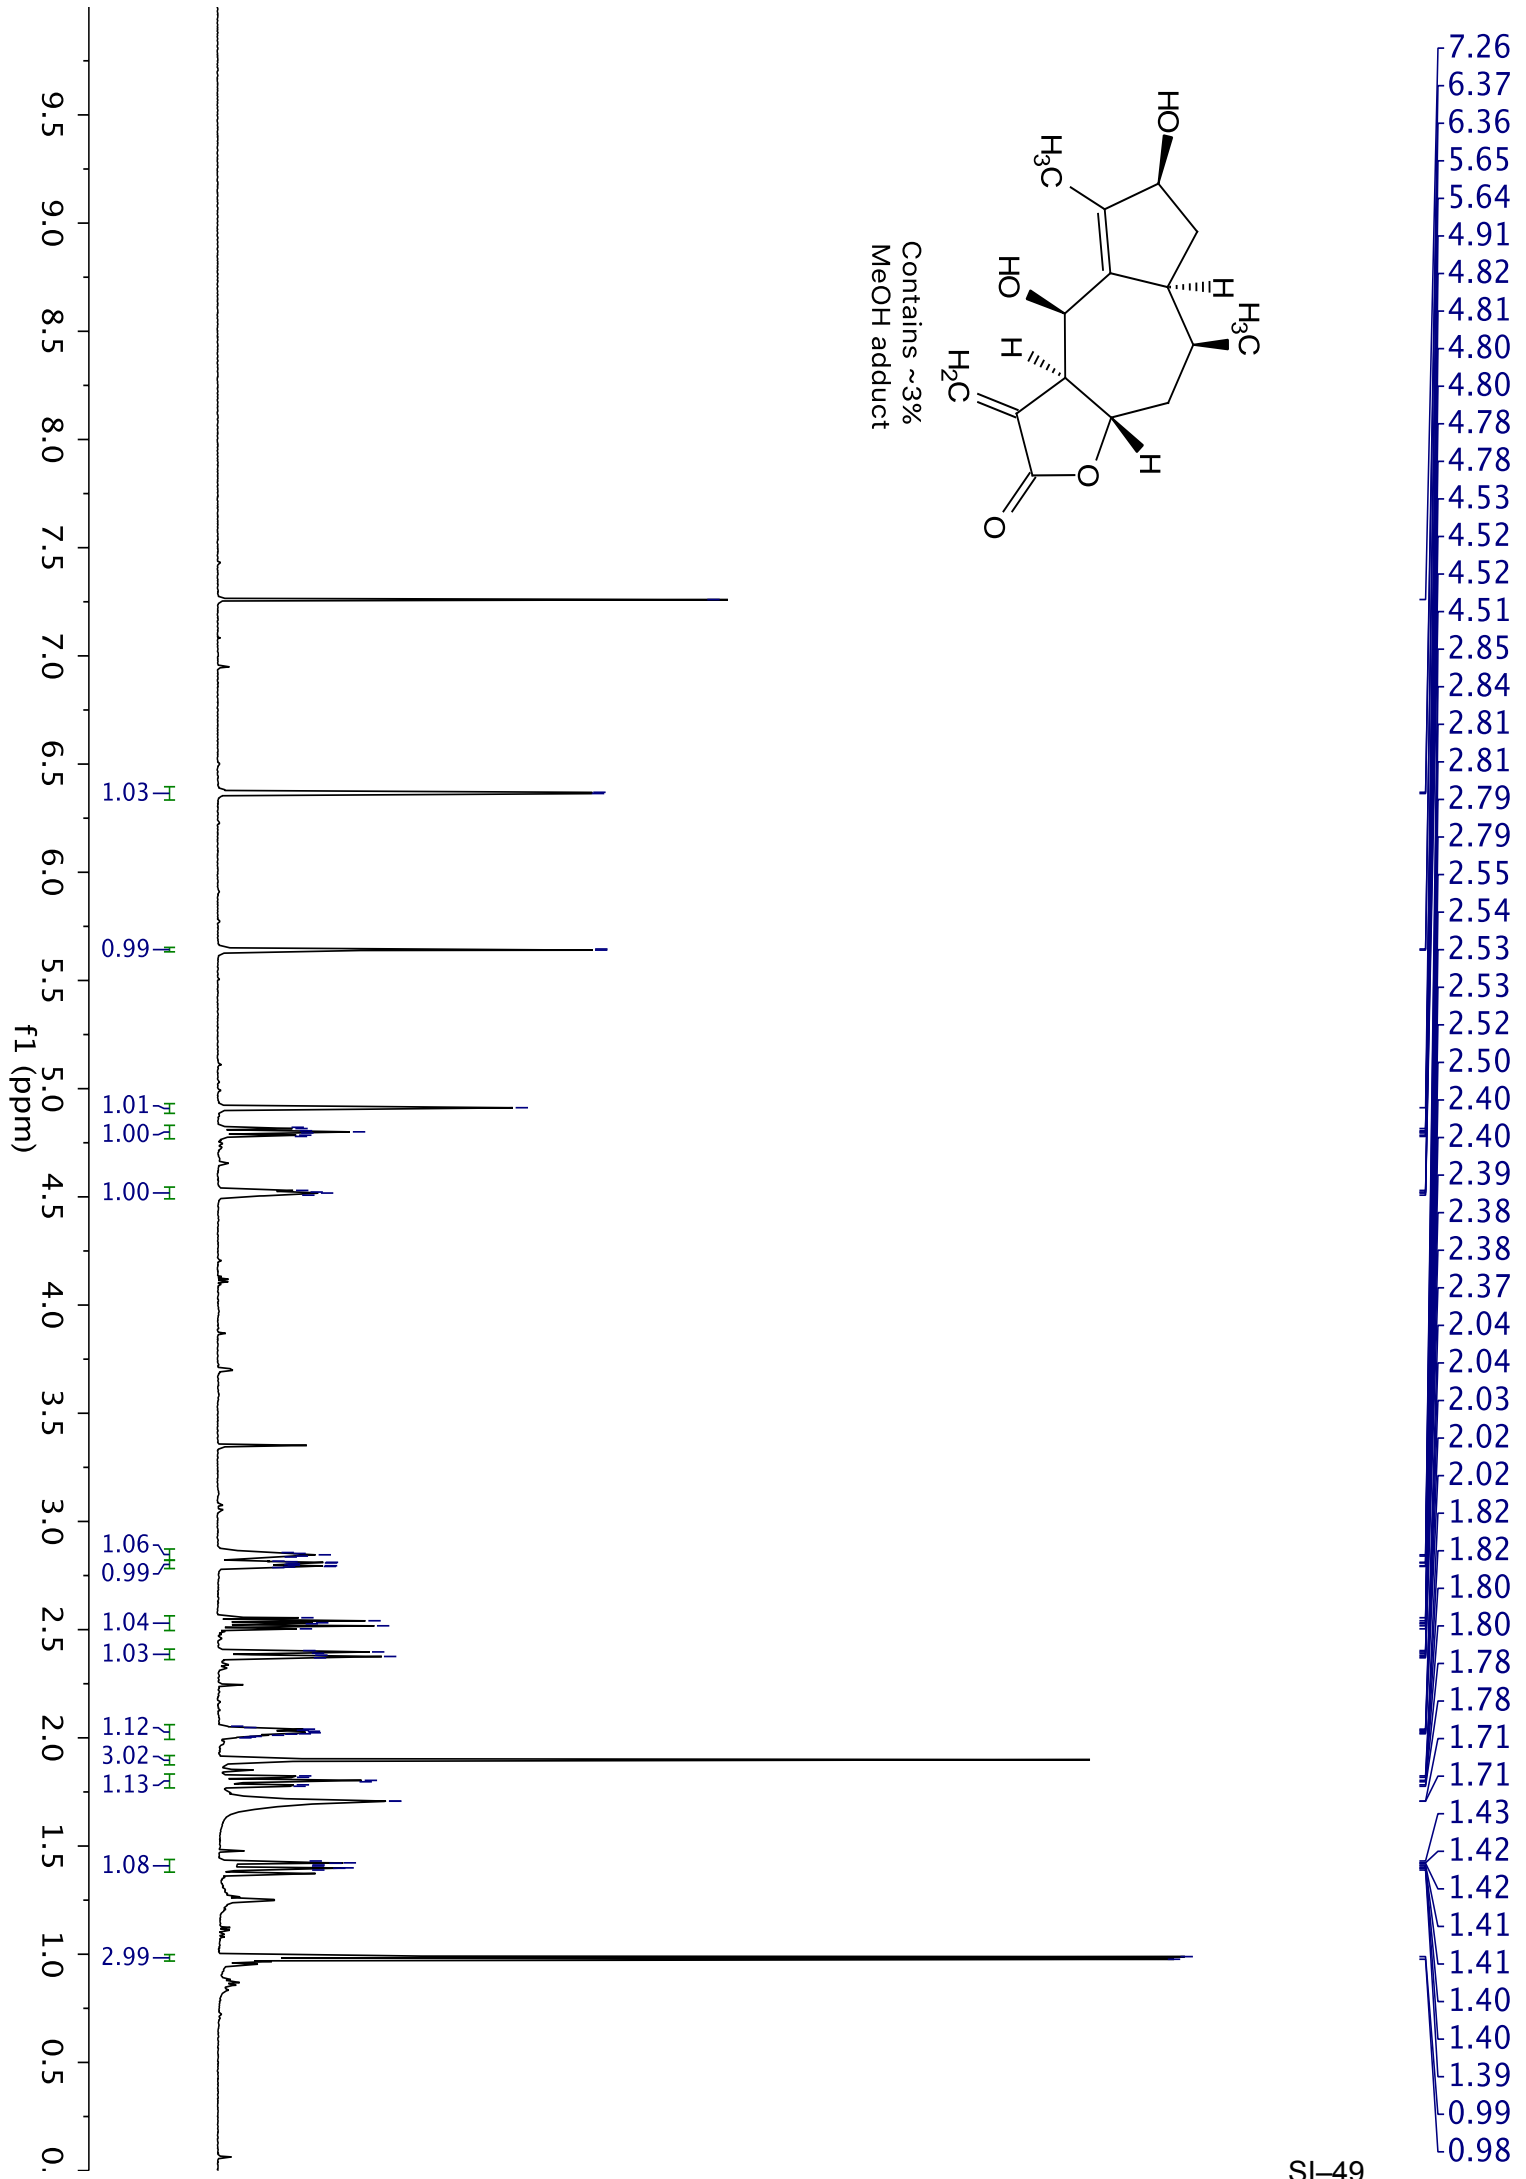

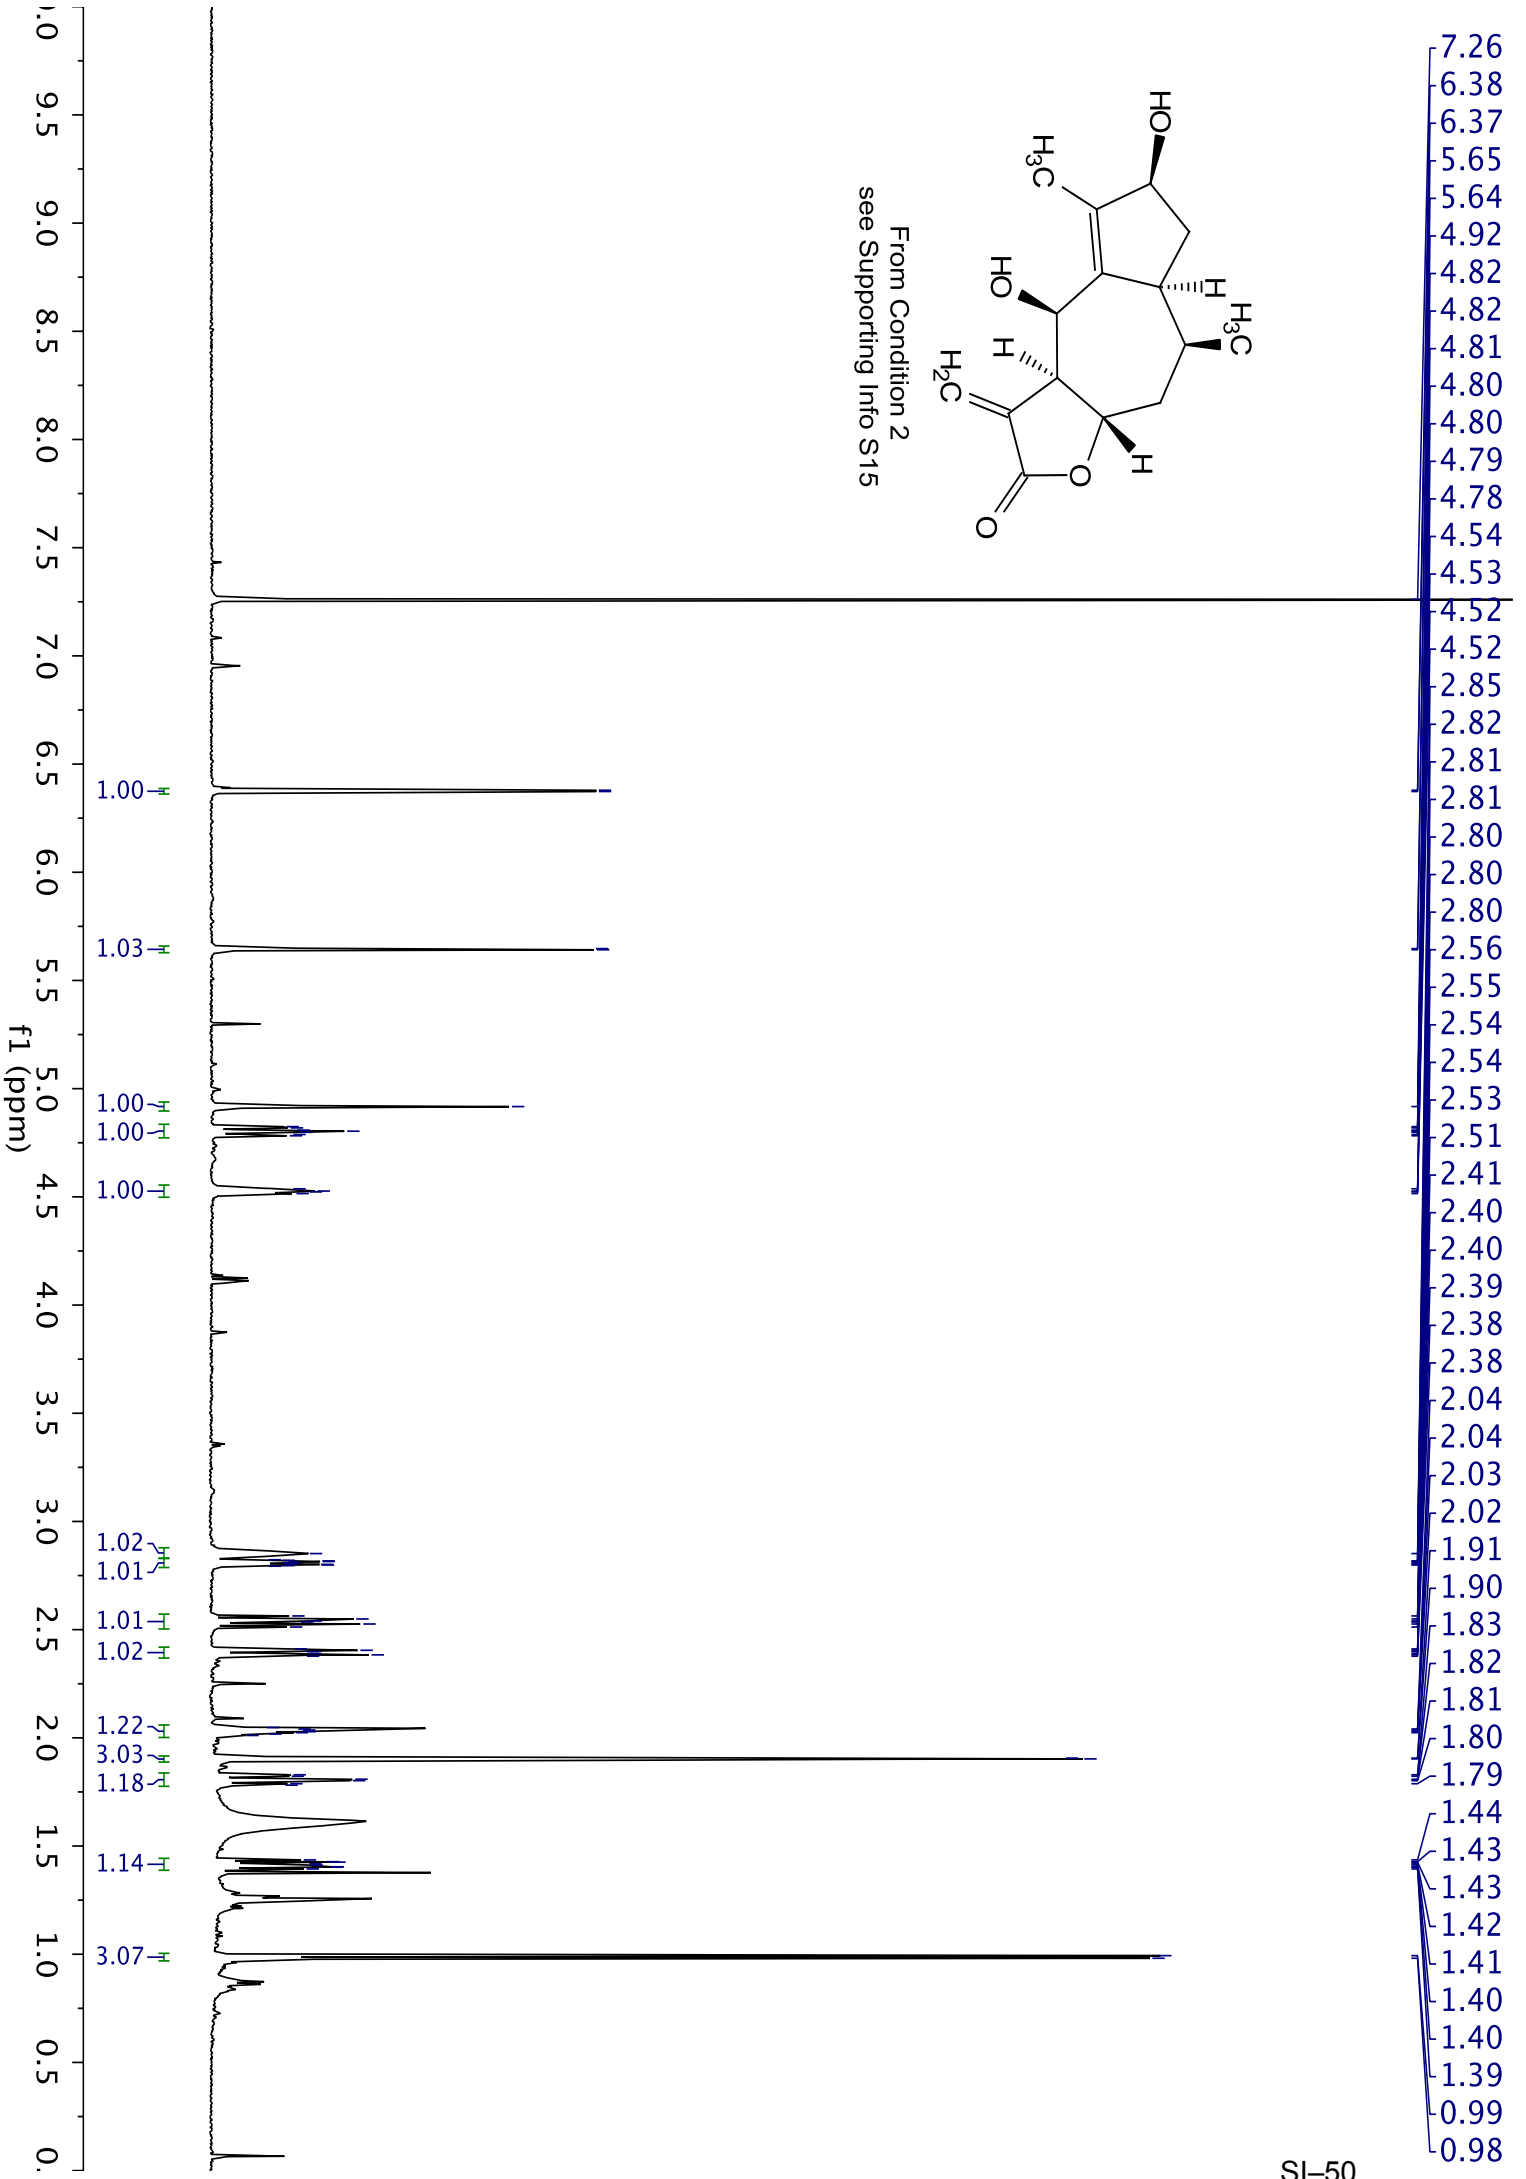

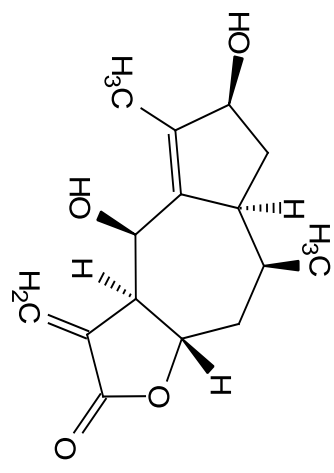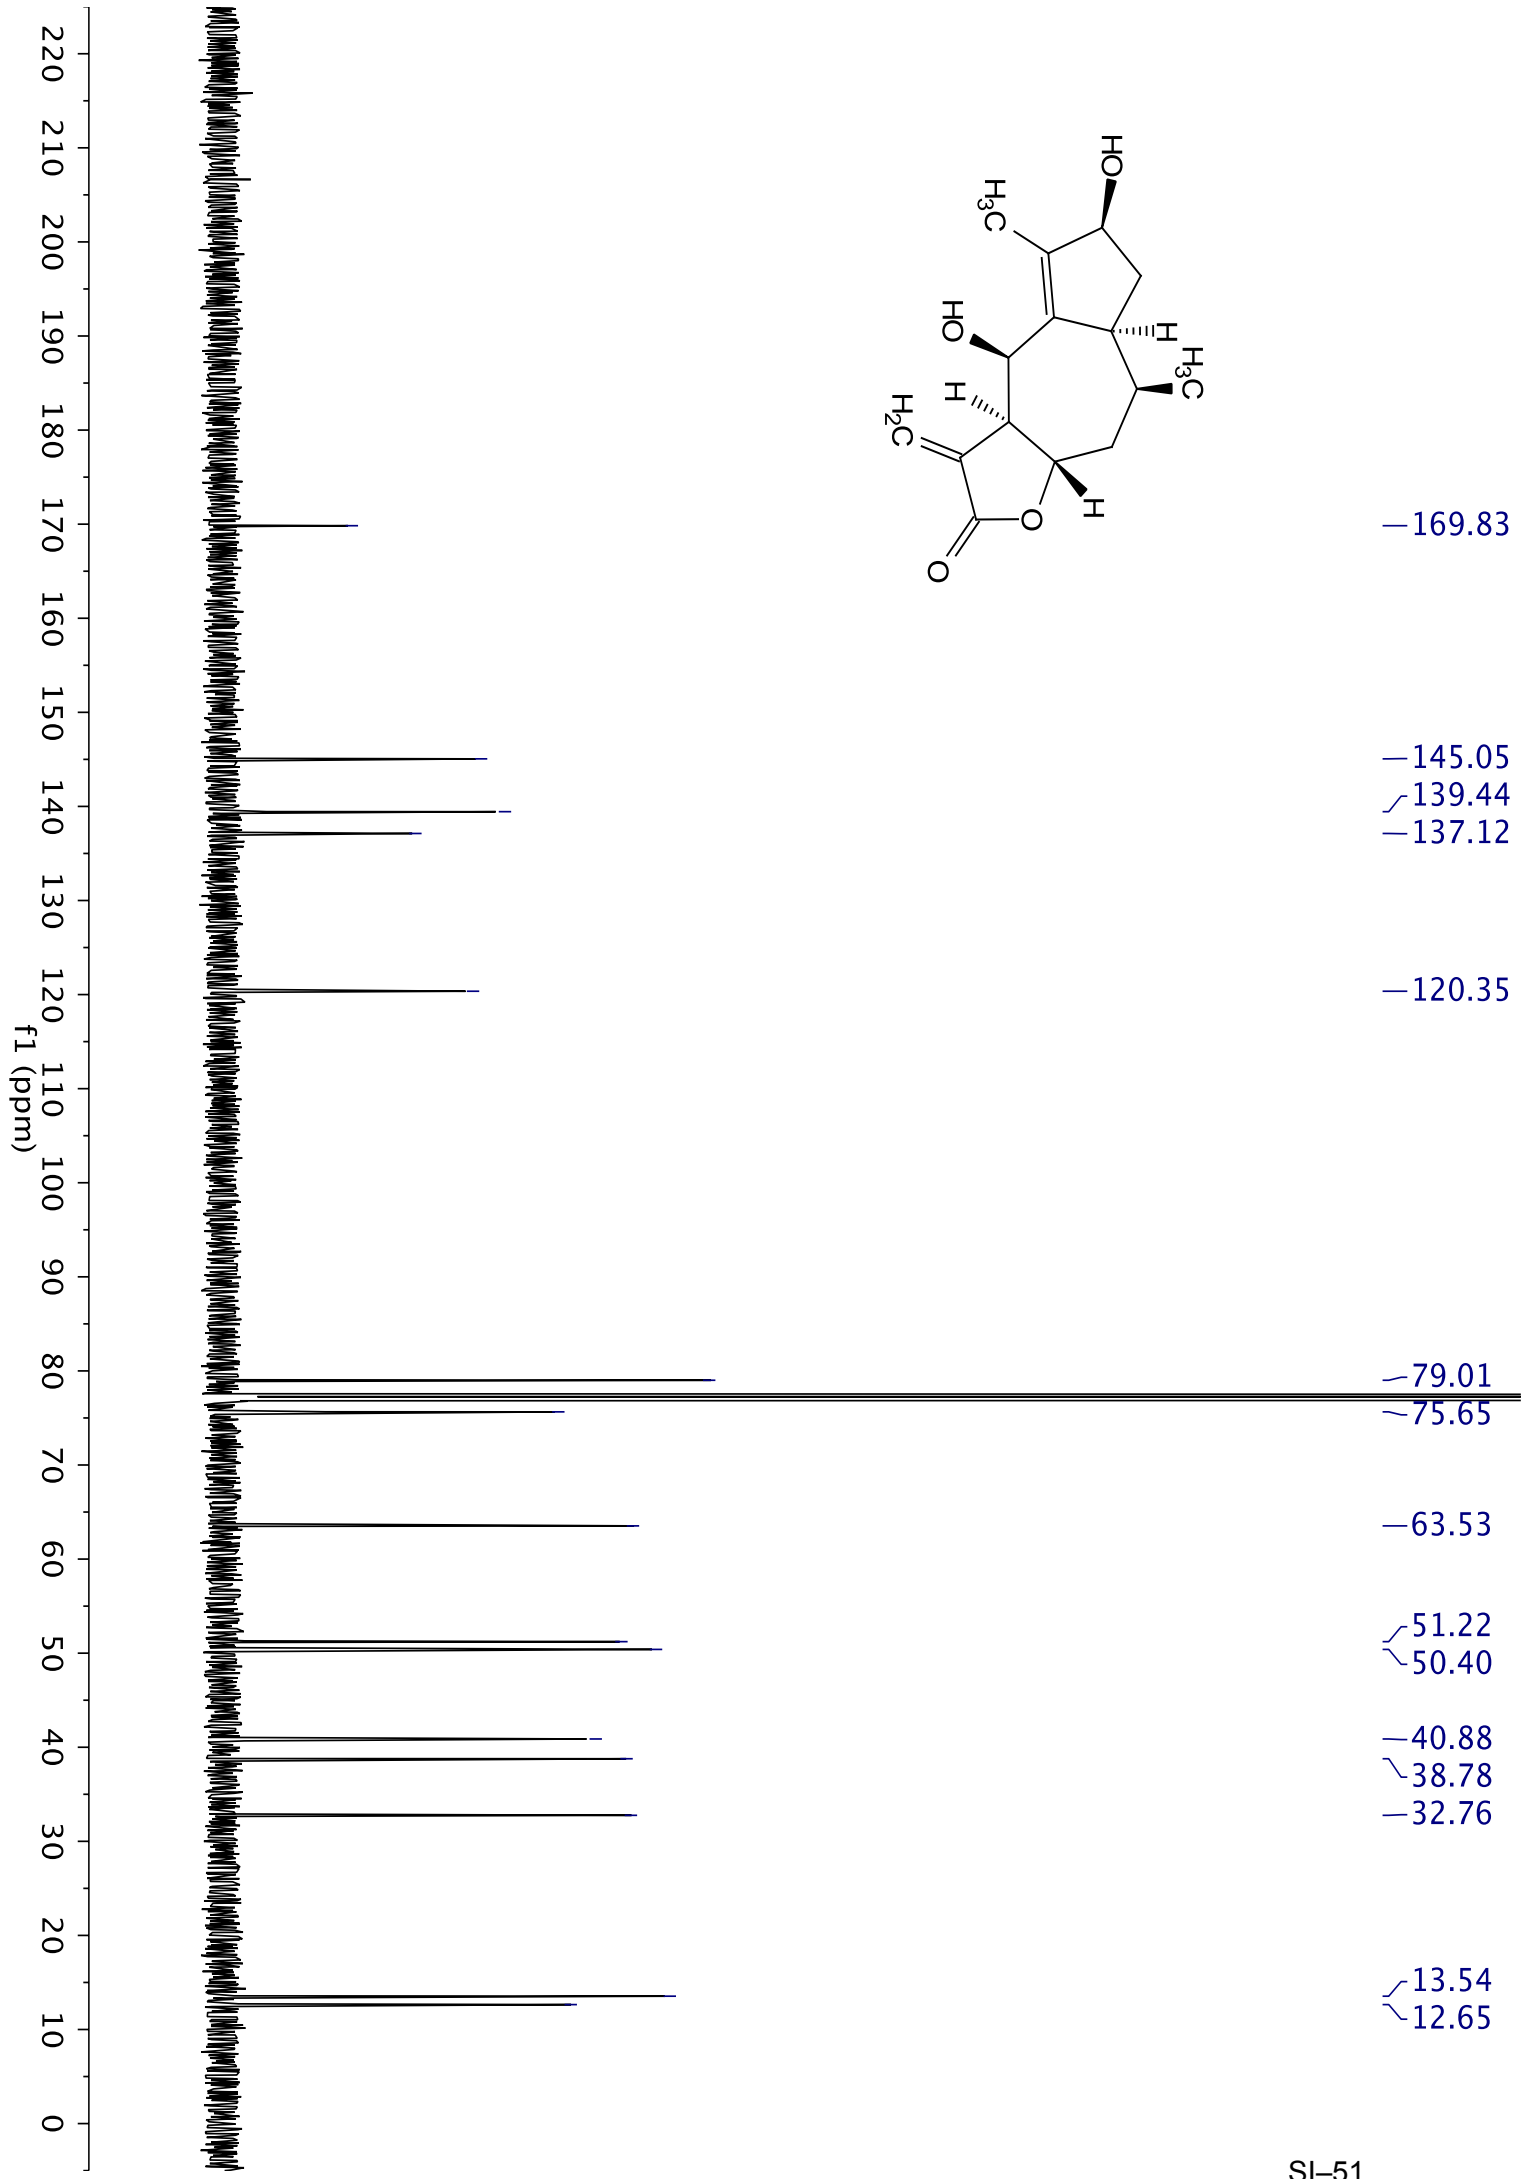

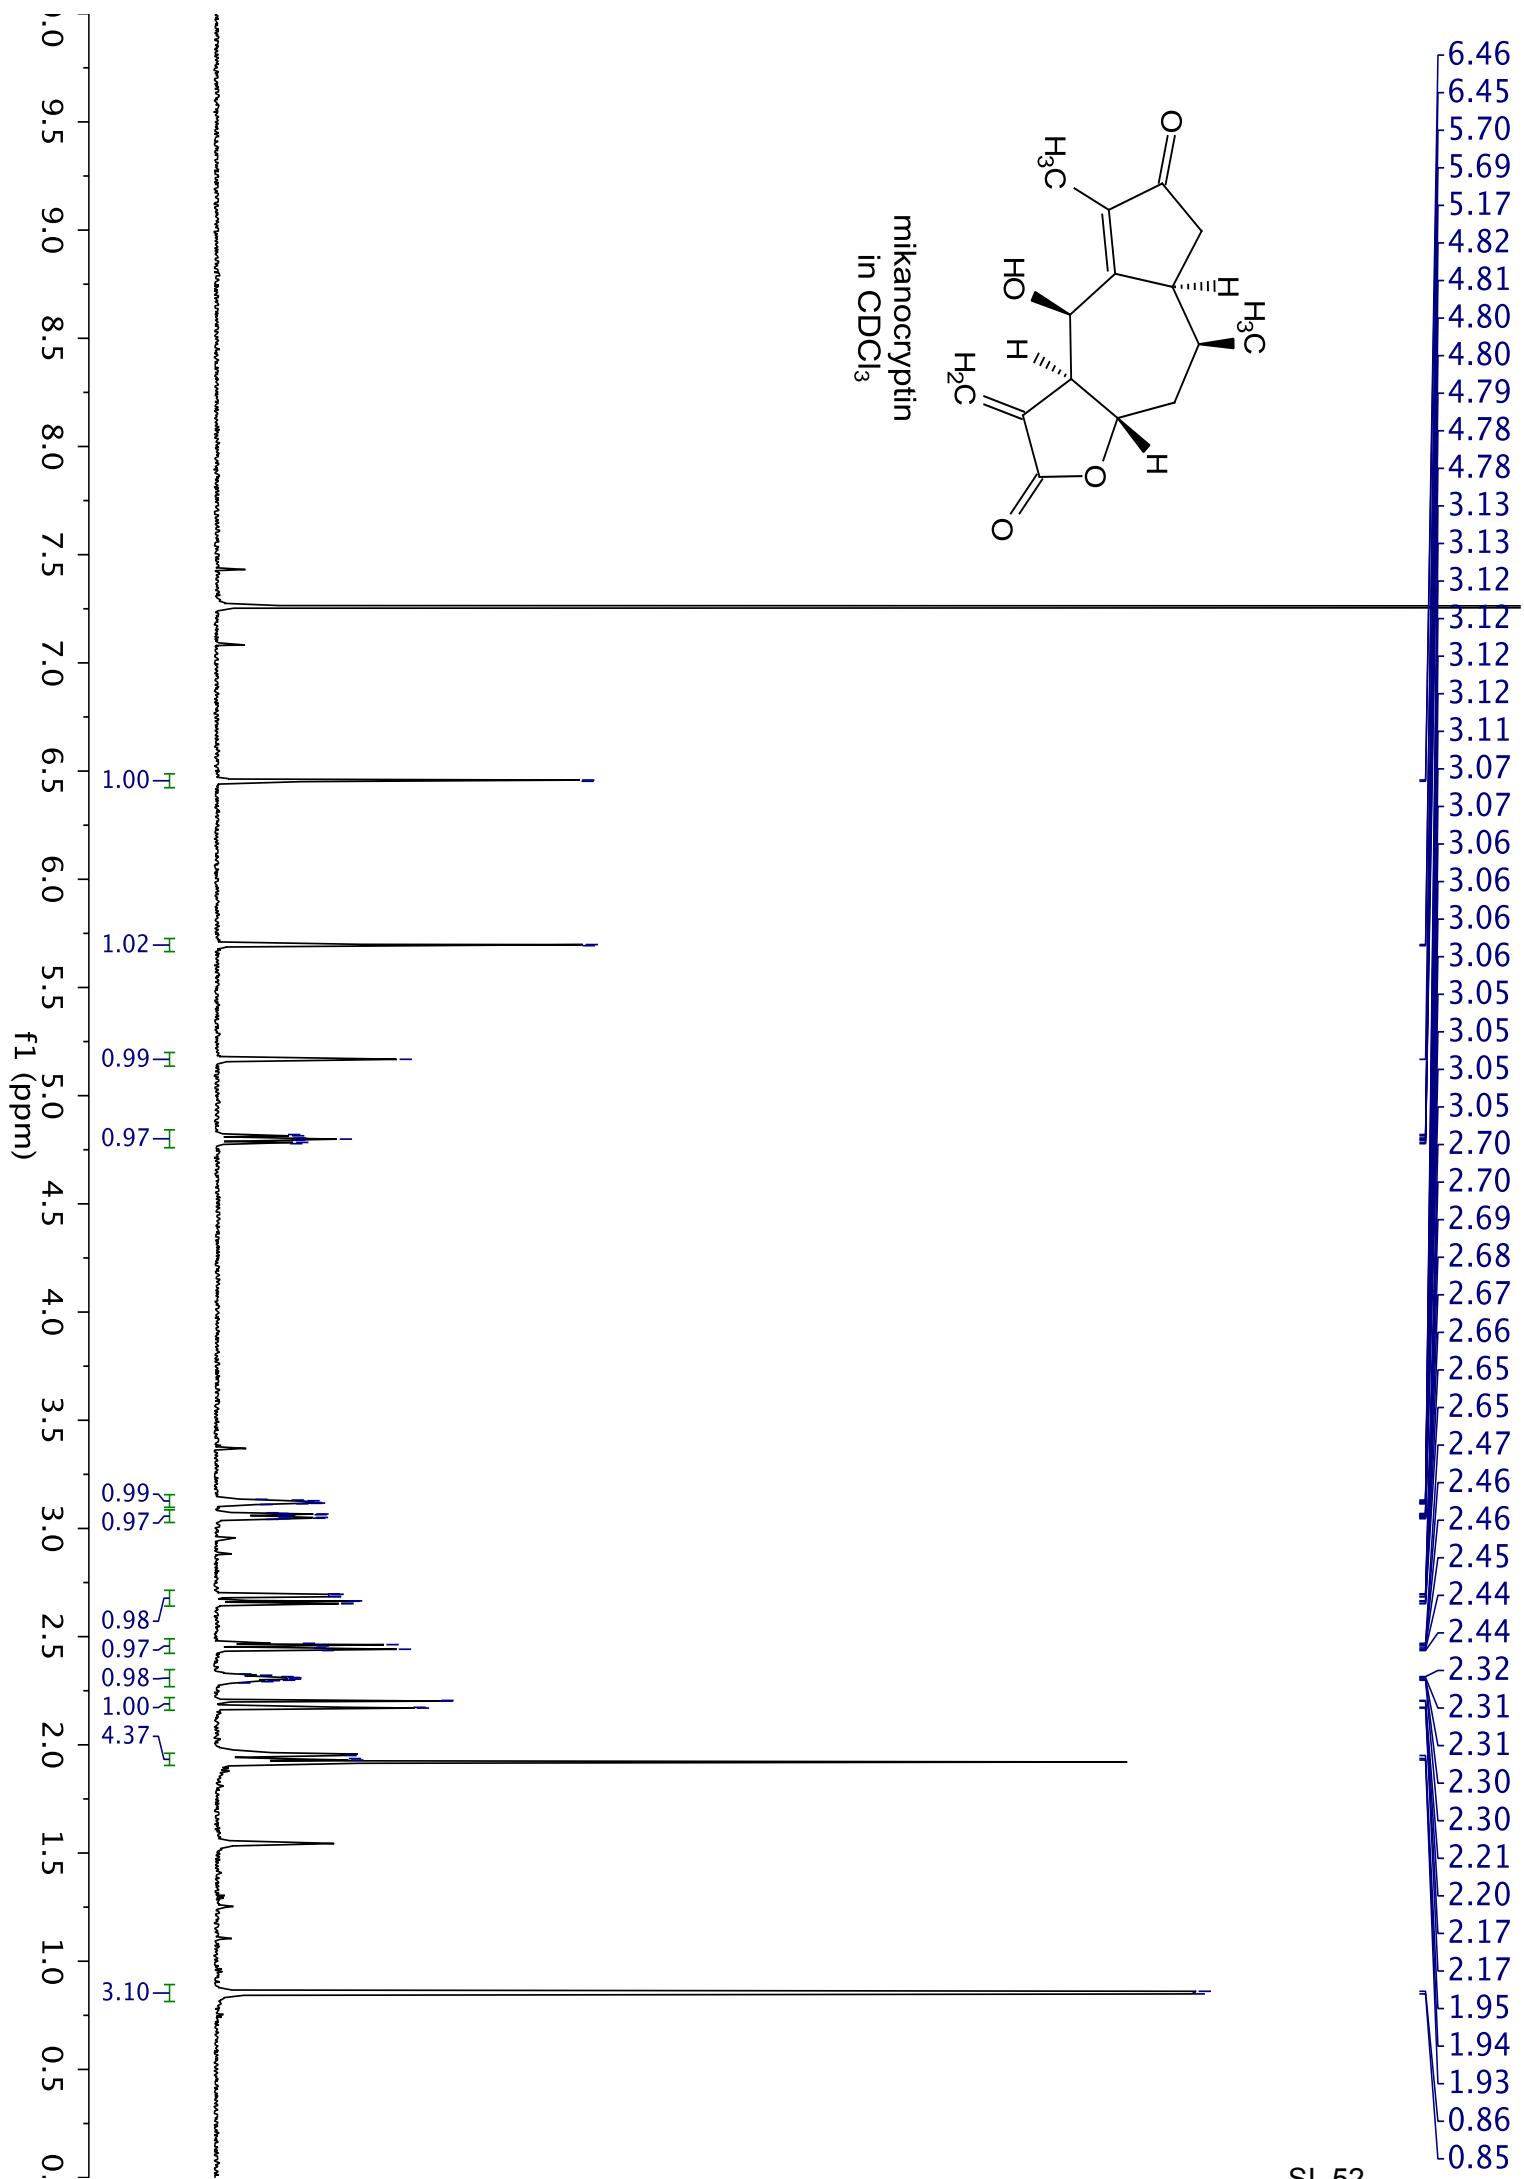



mikanocryptin  
in d-DMSO

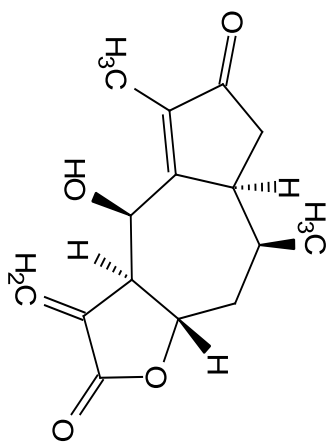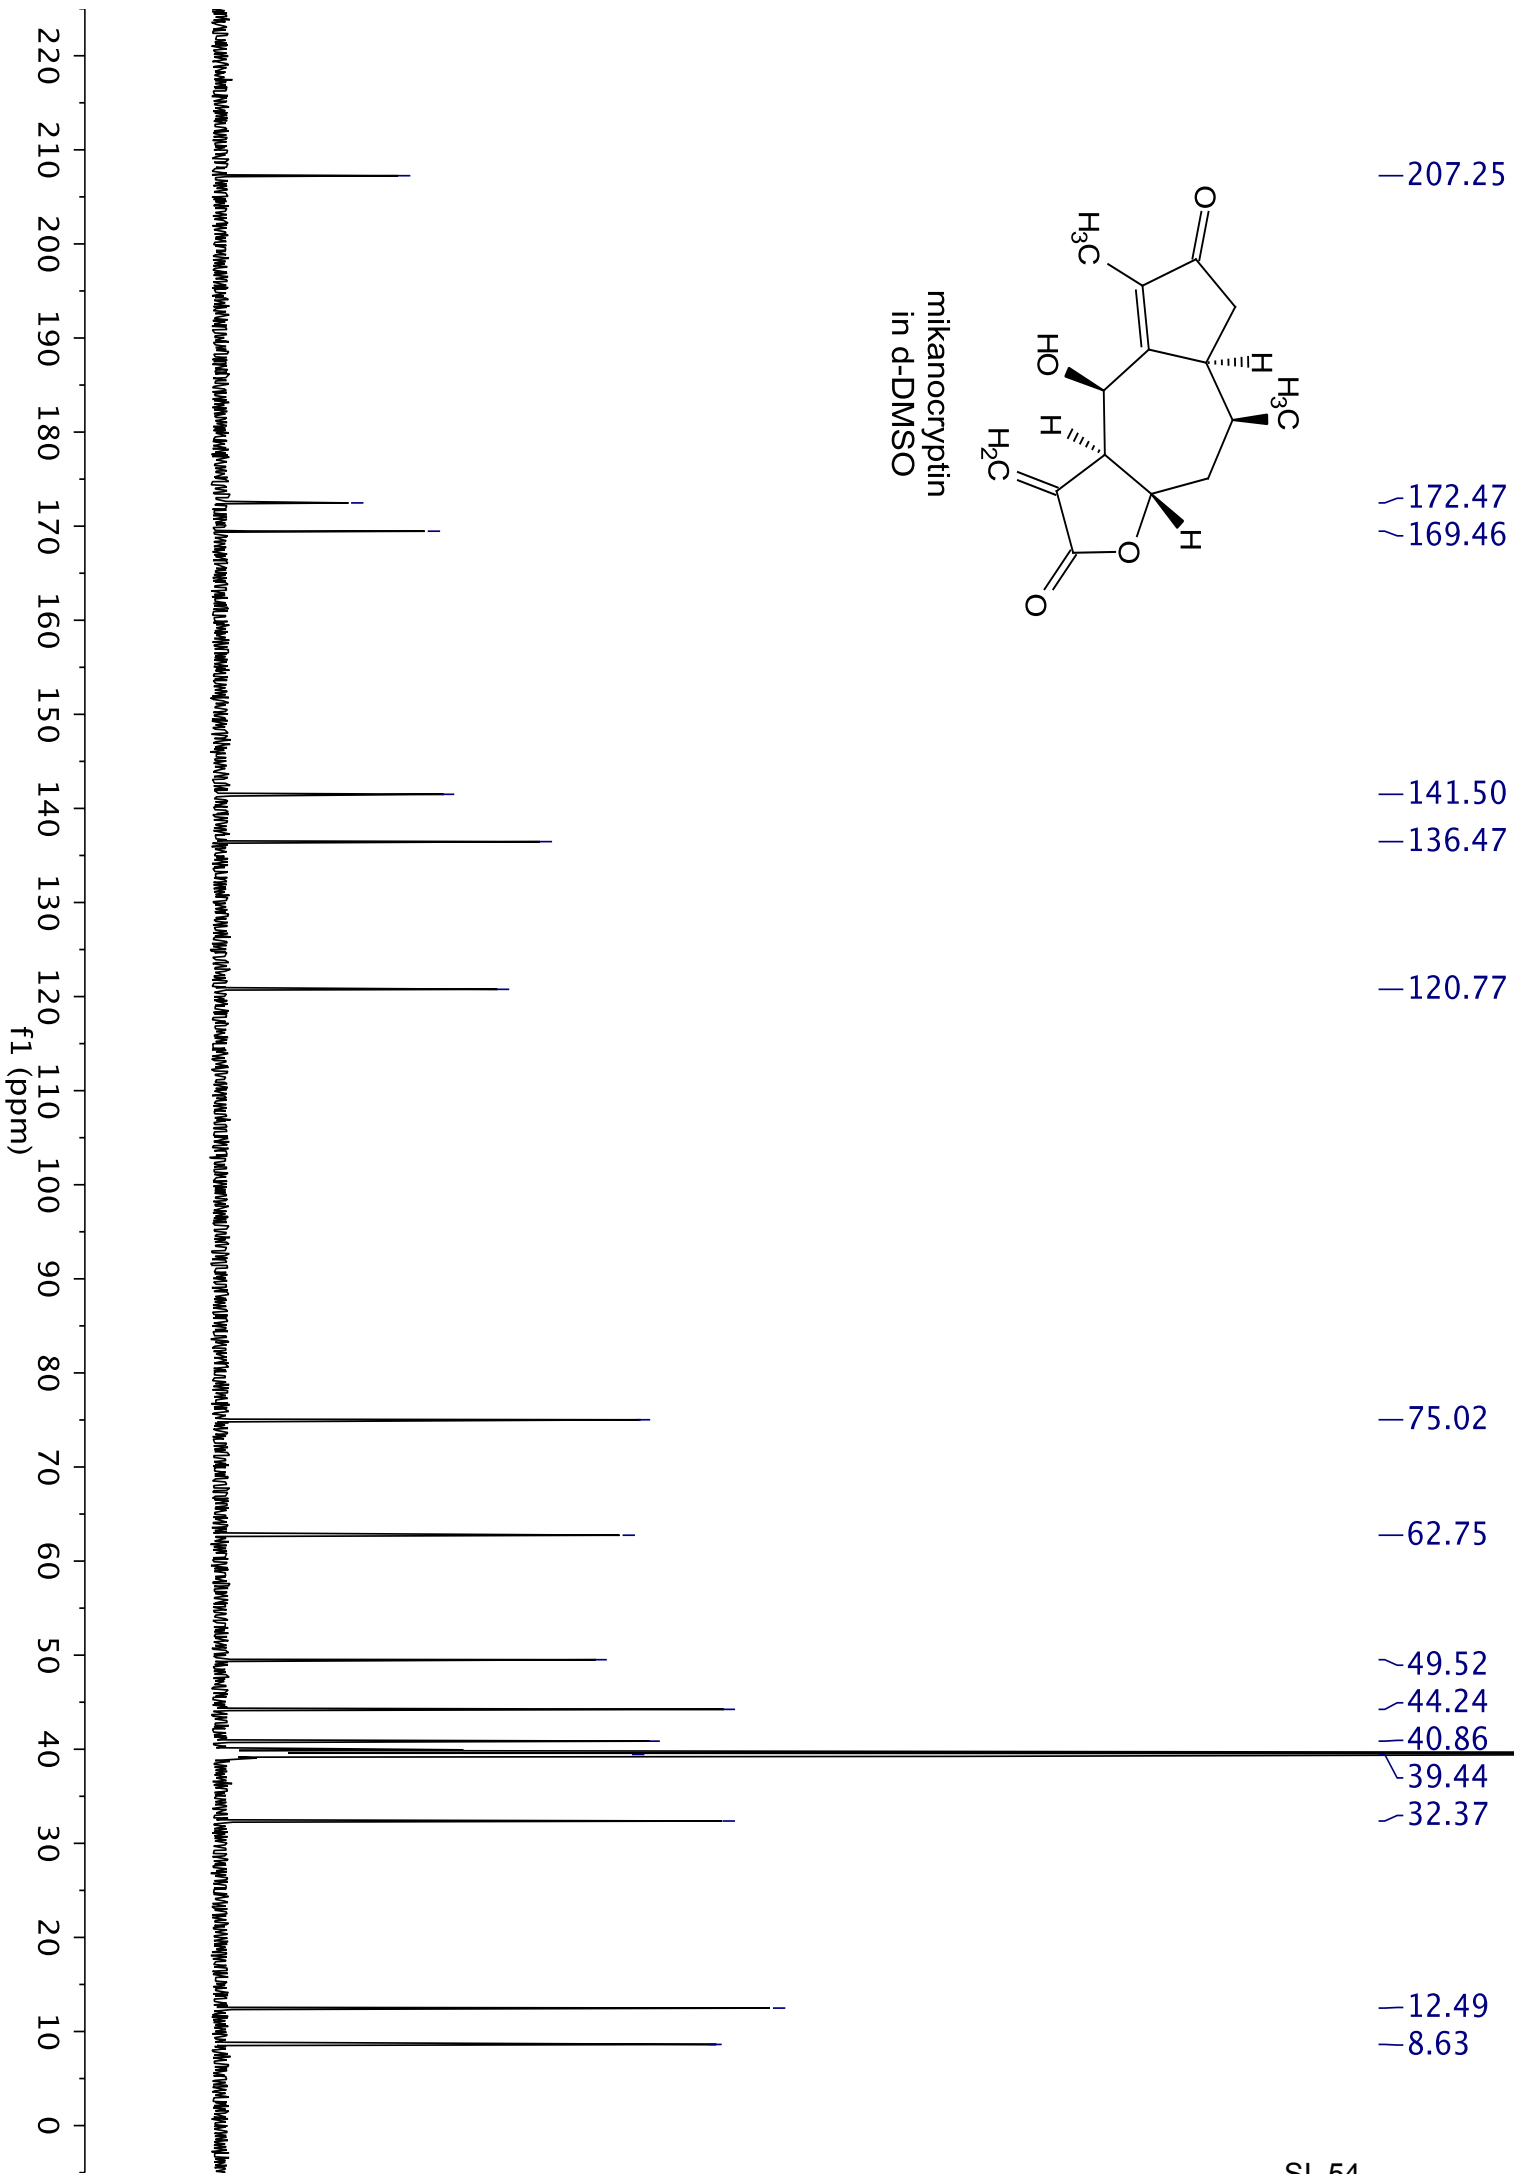

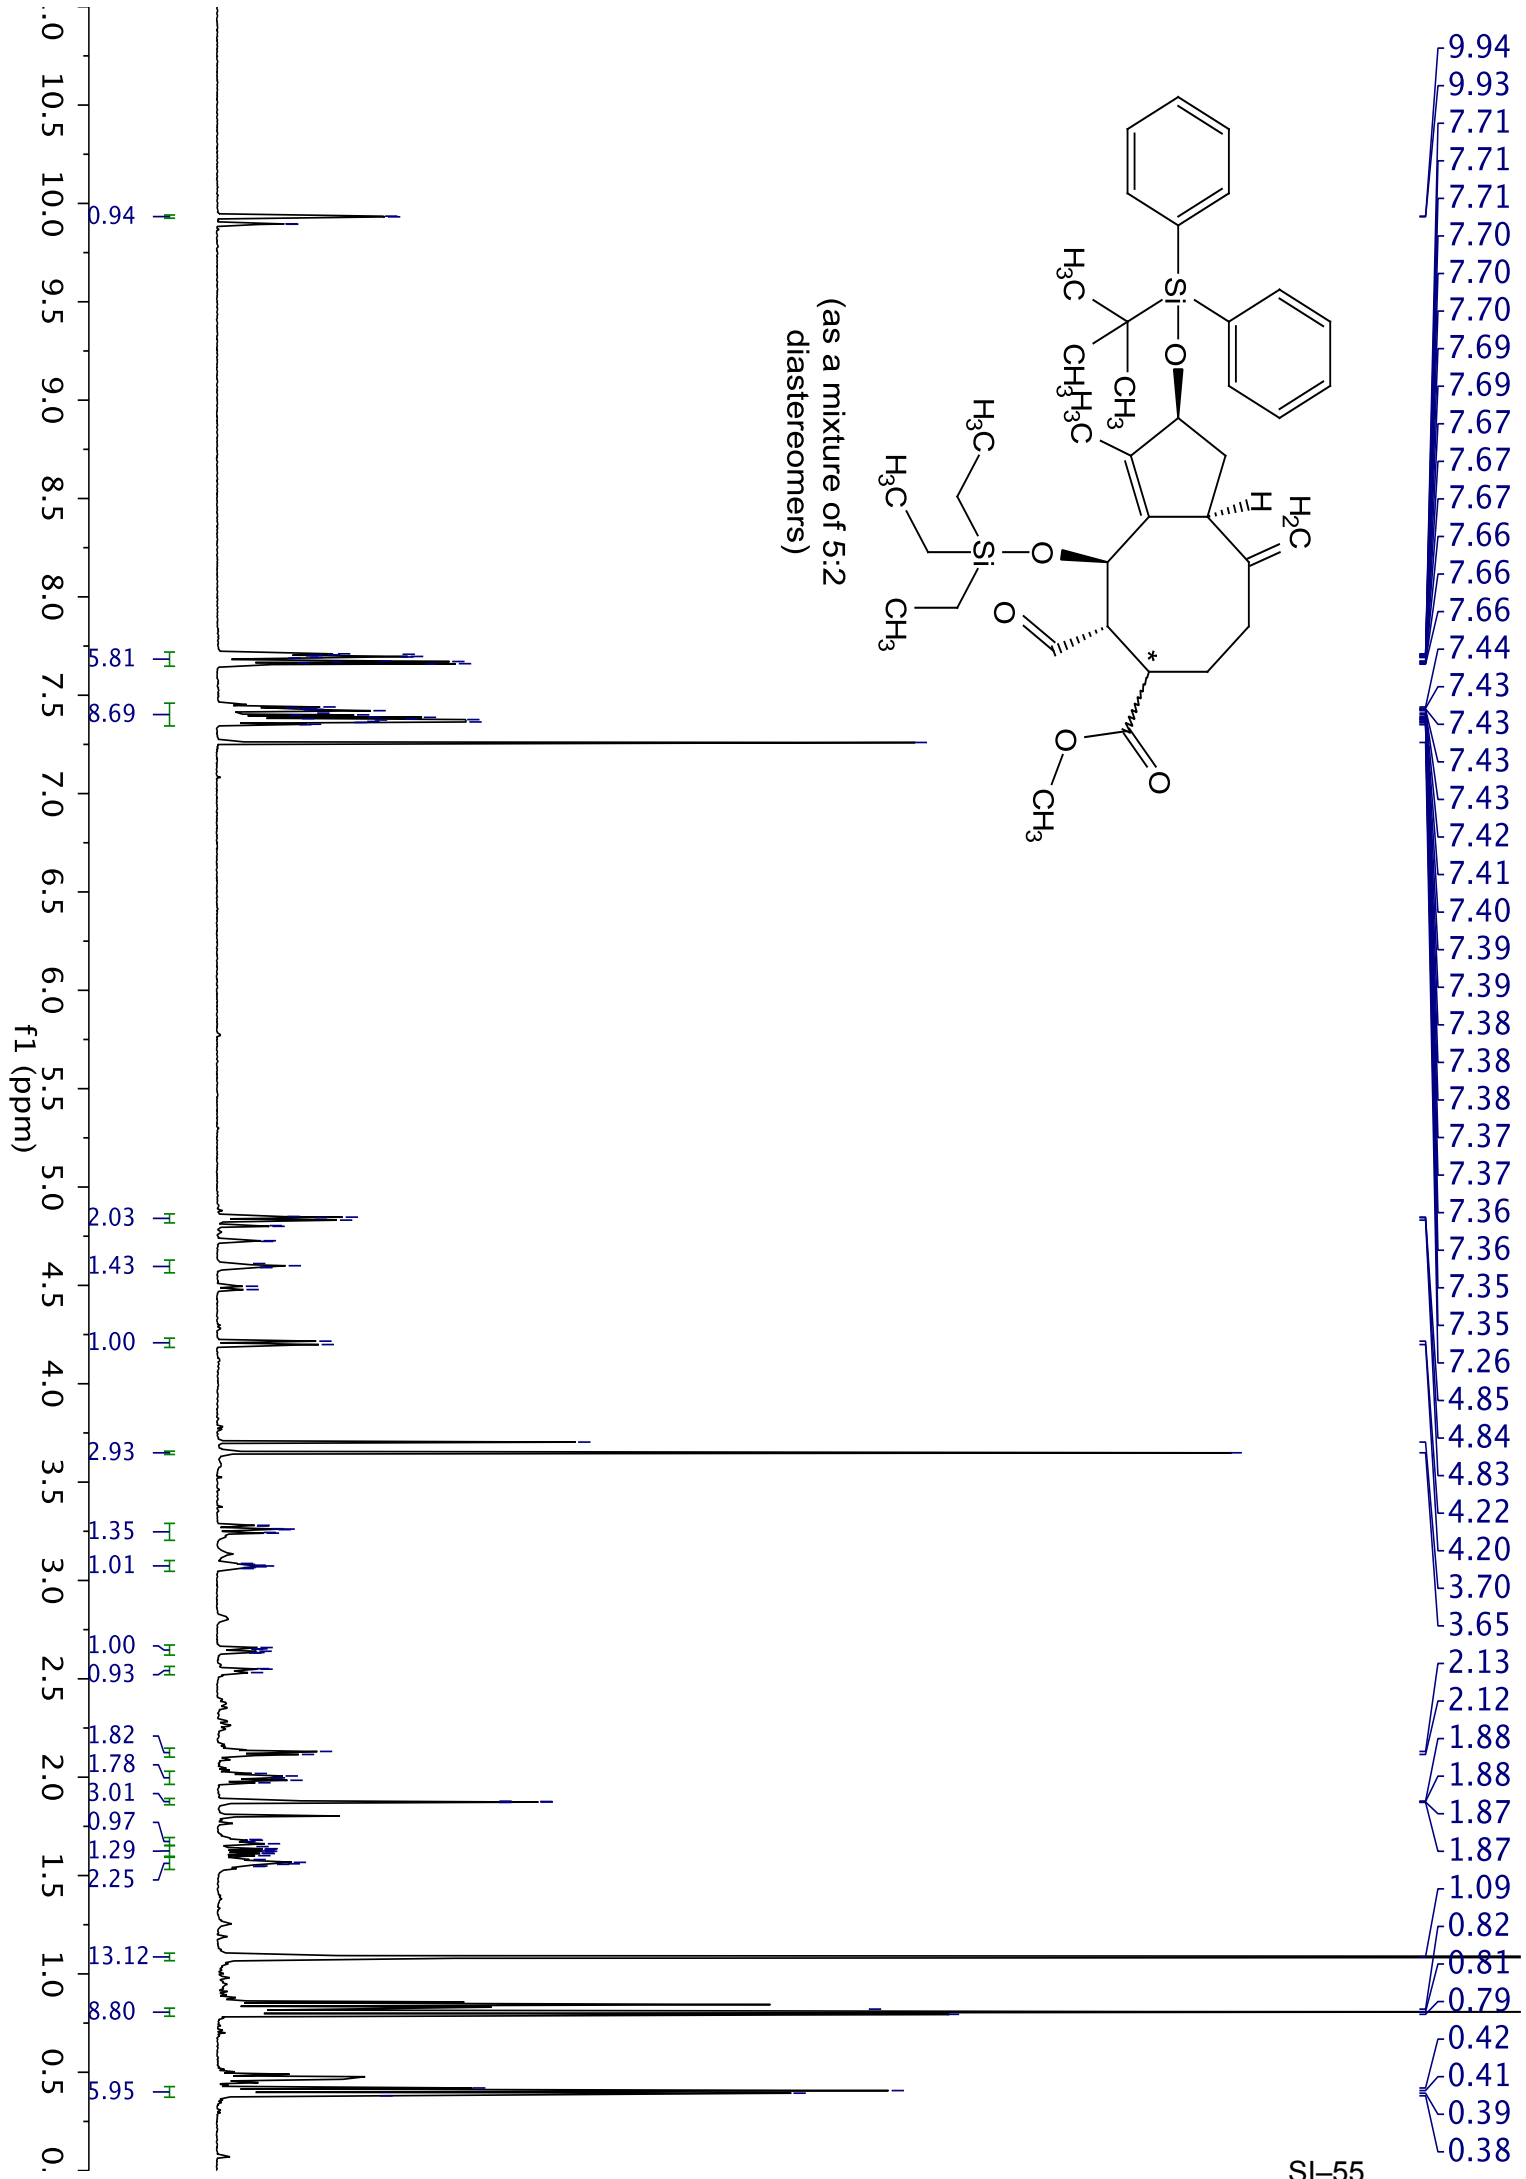

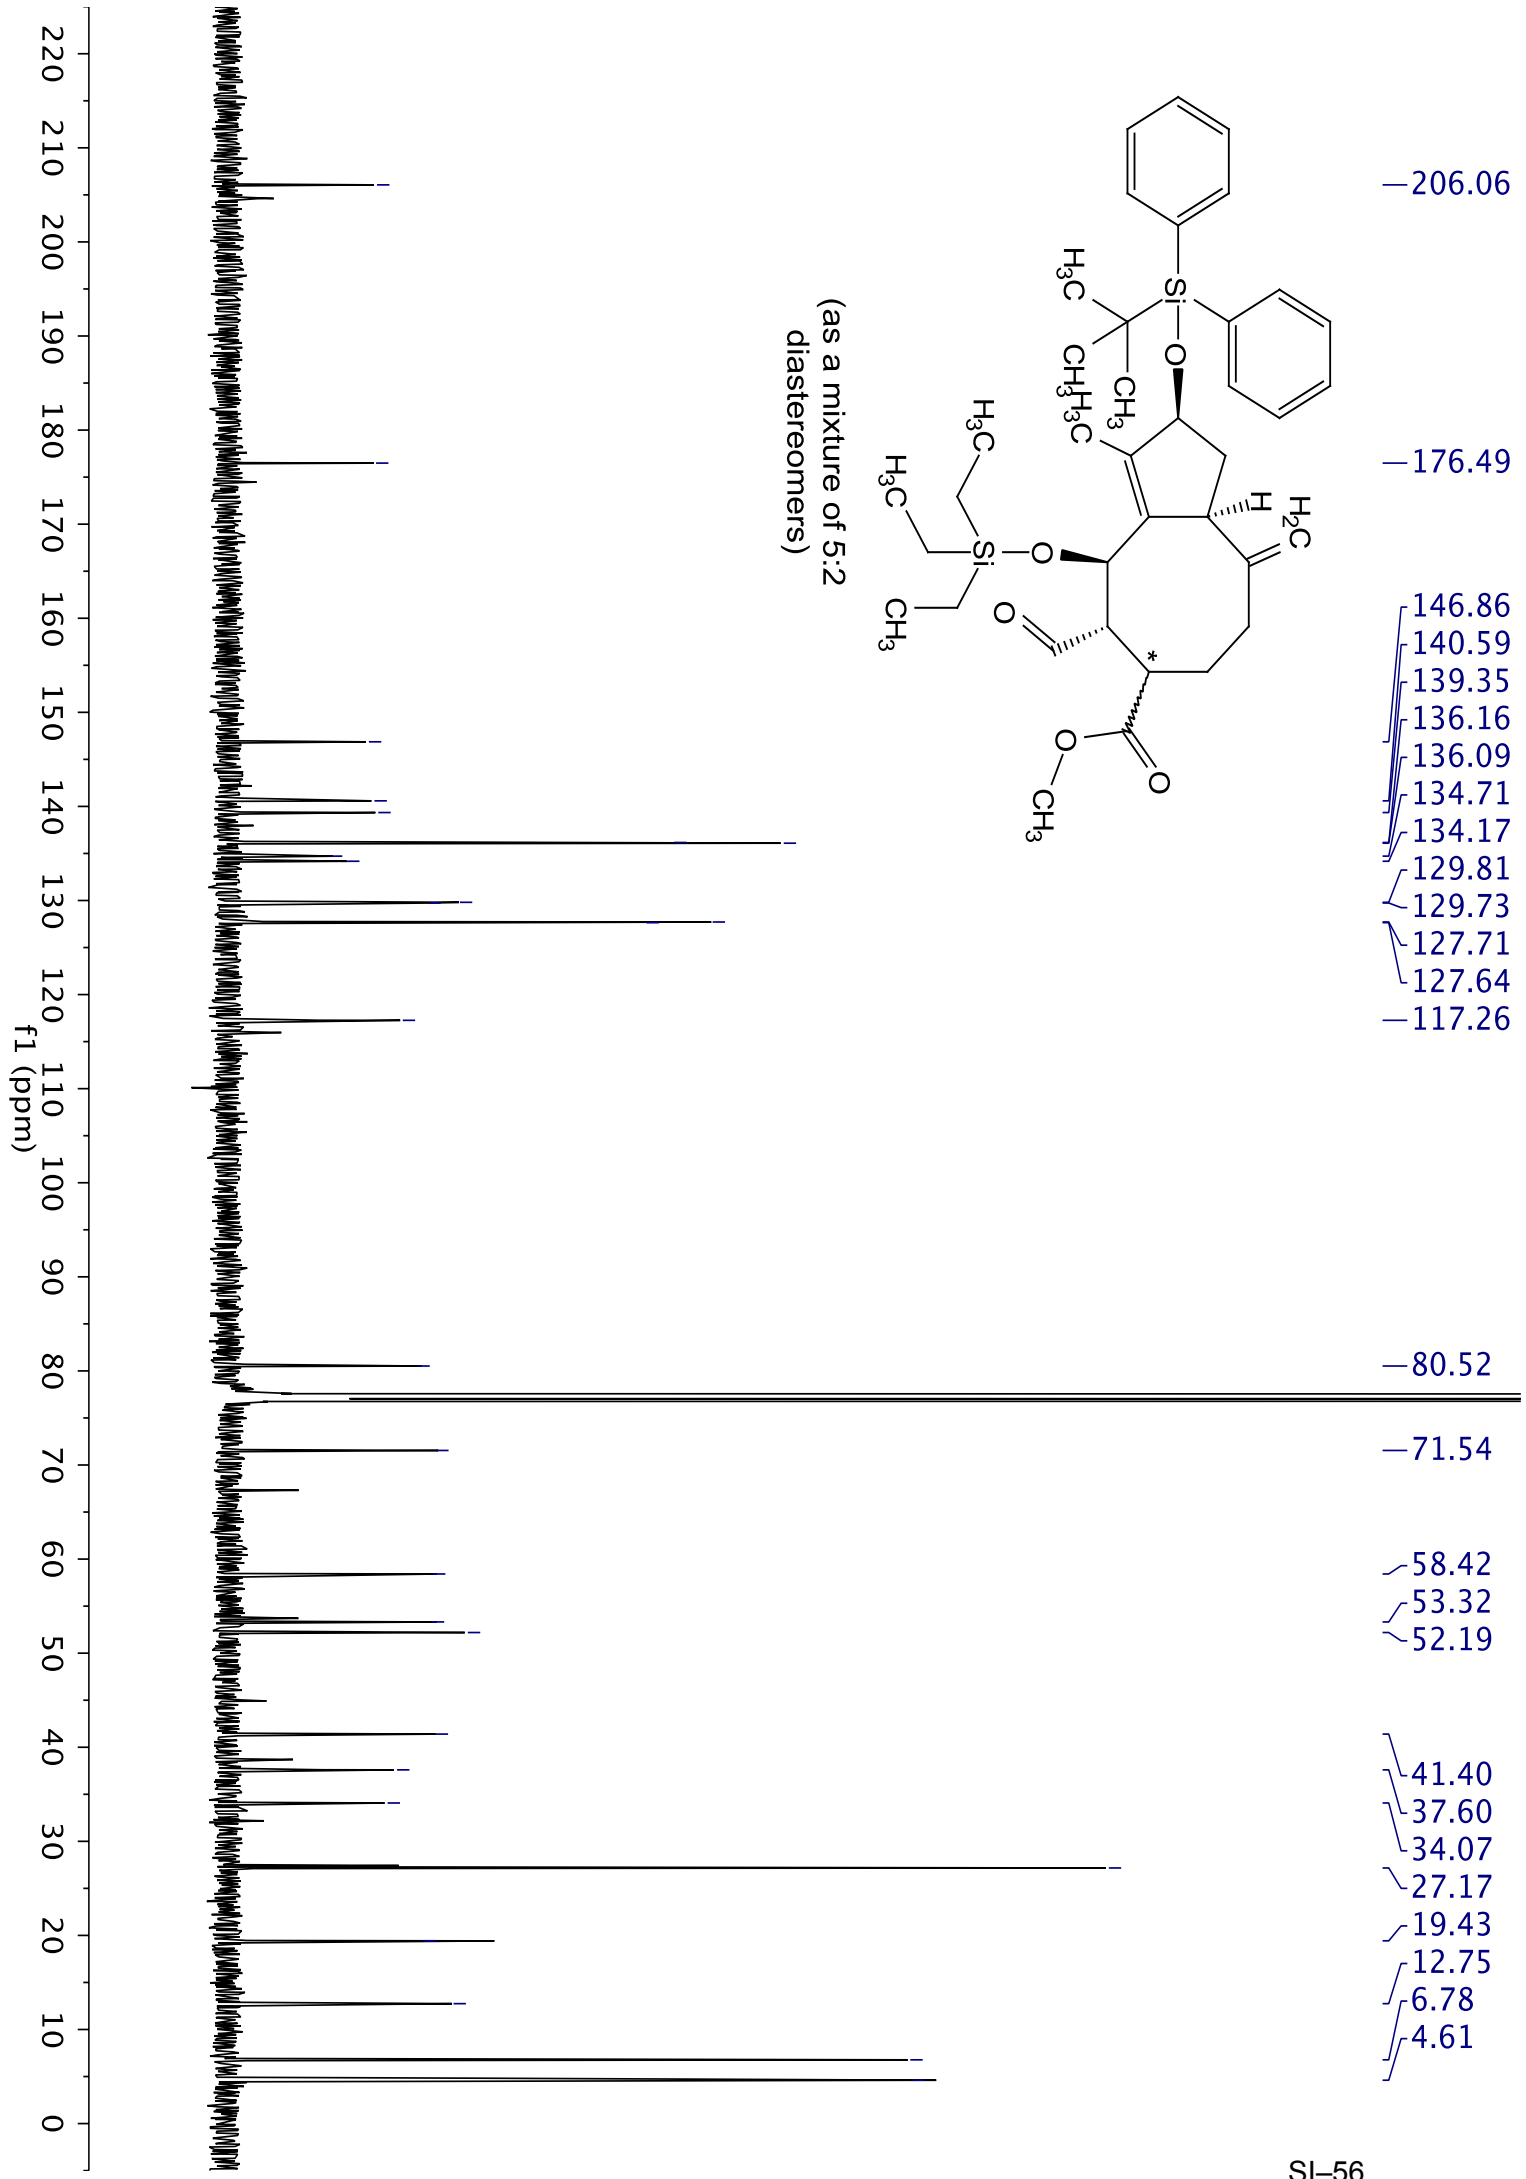



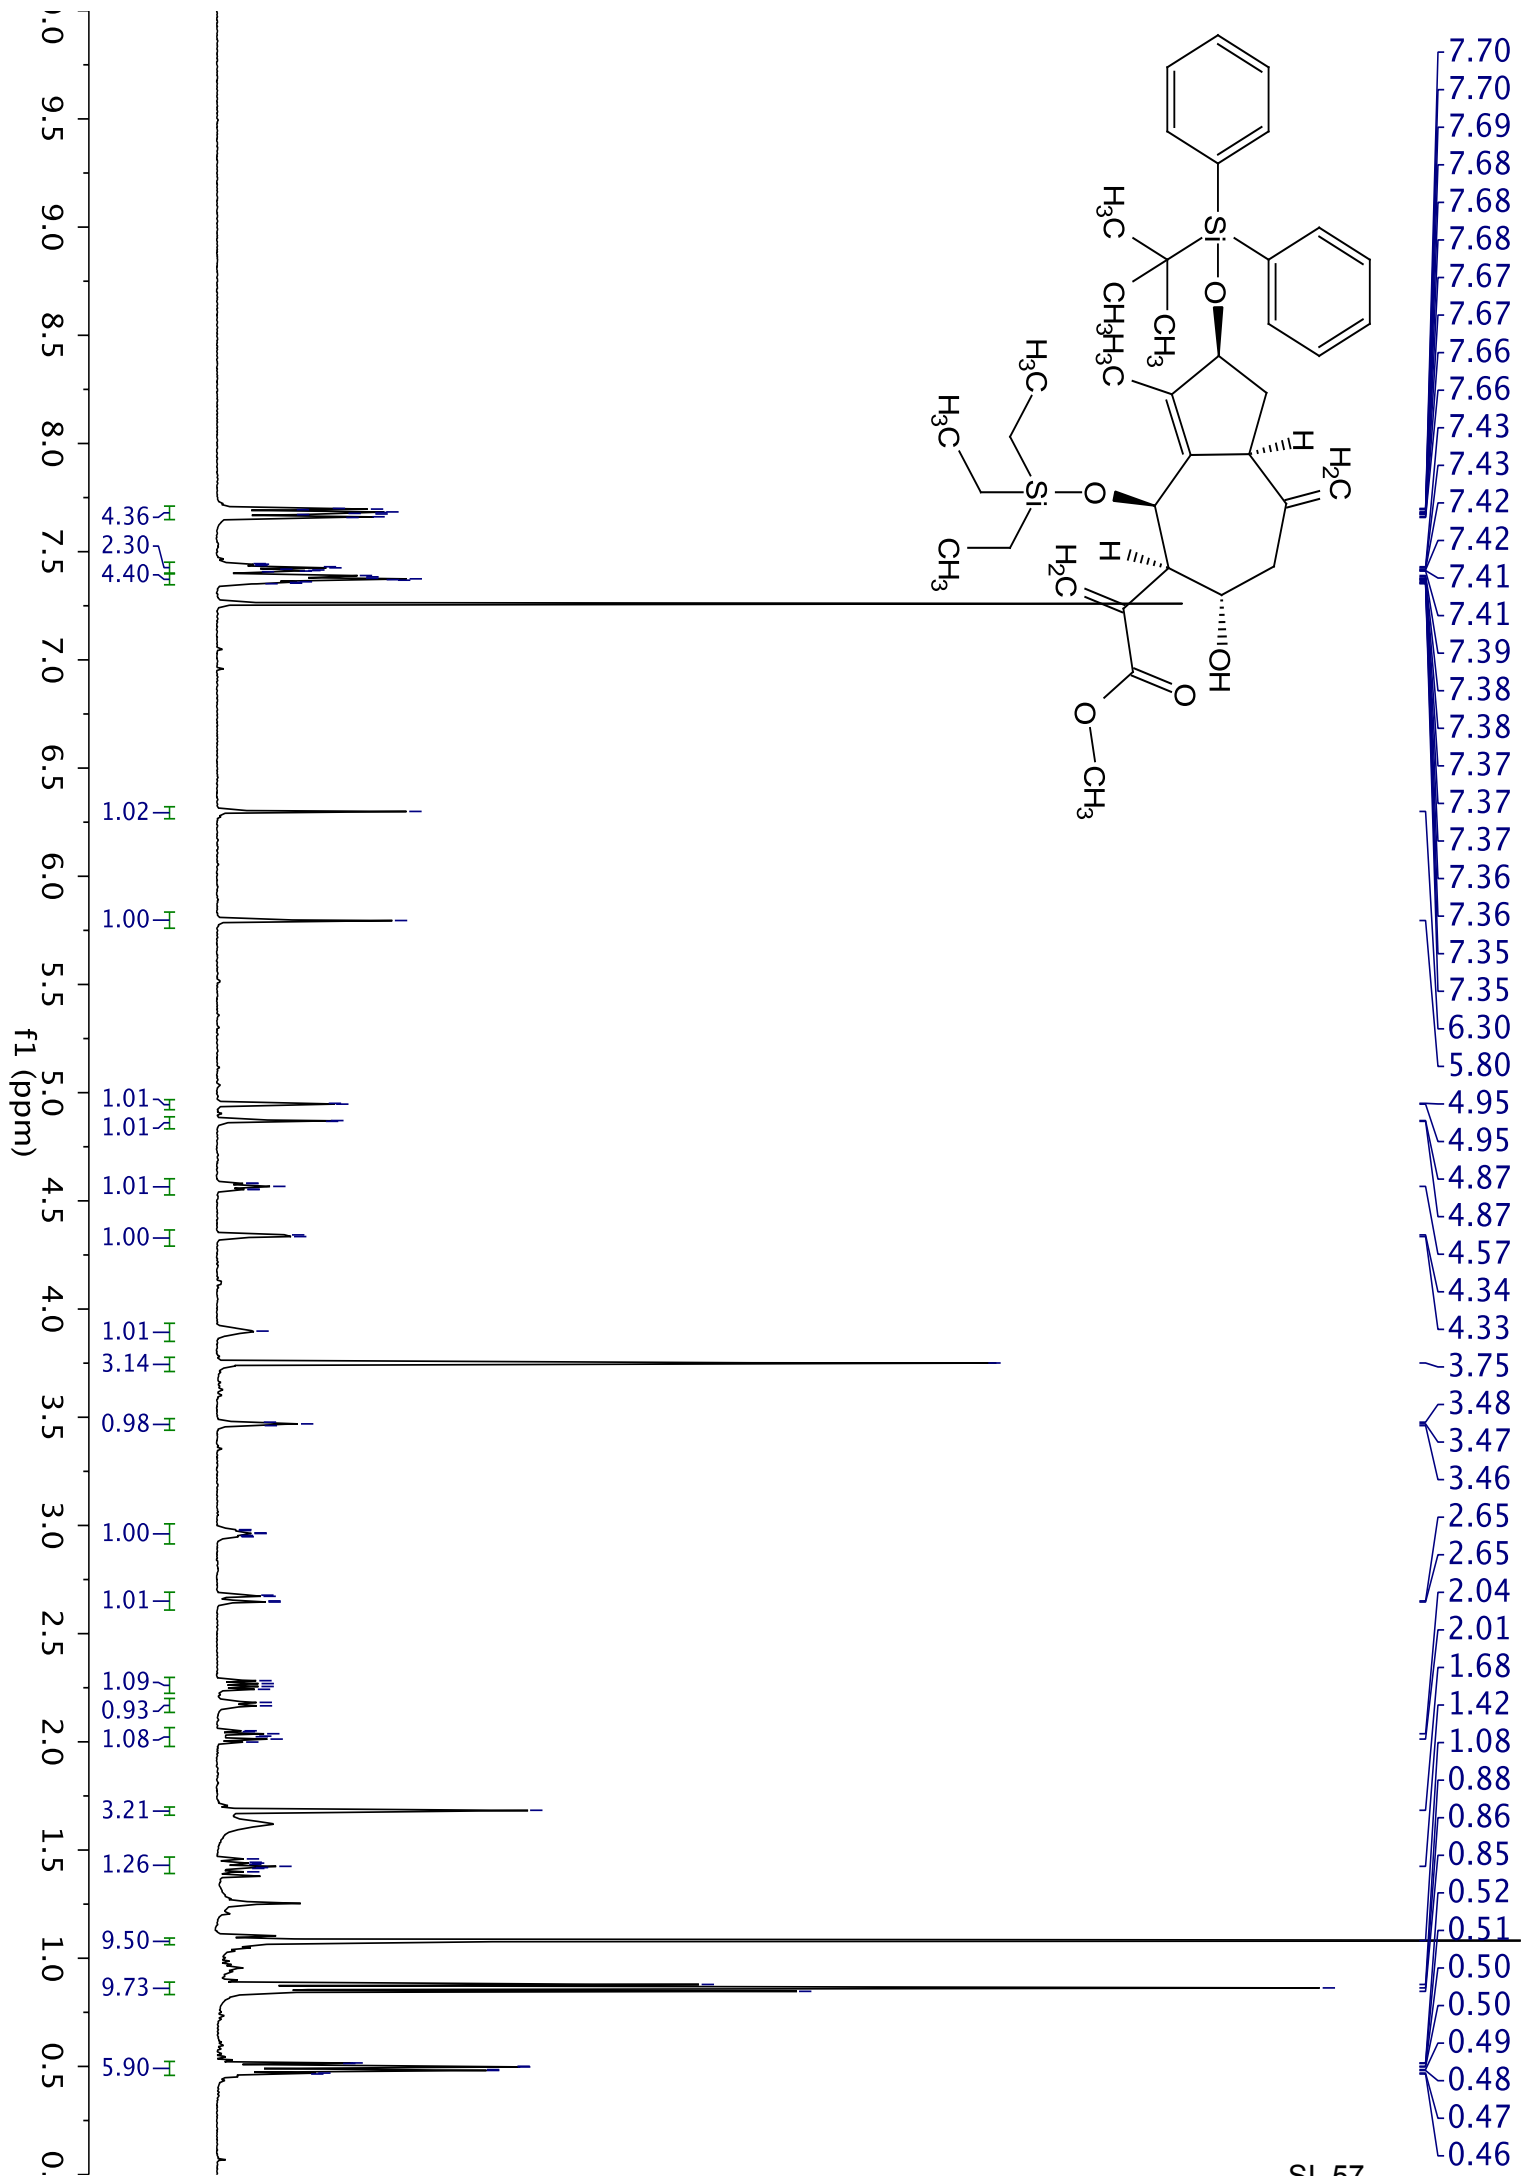

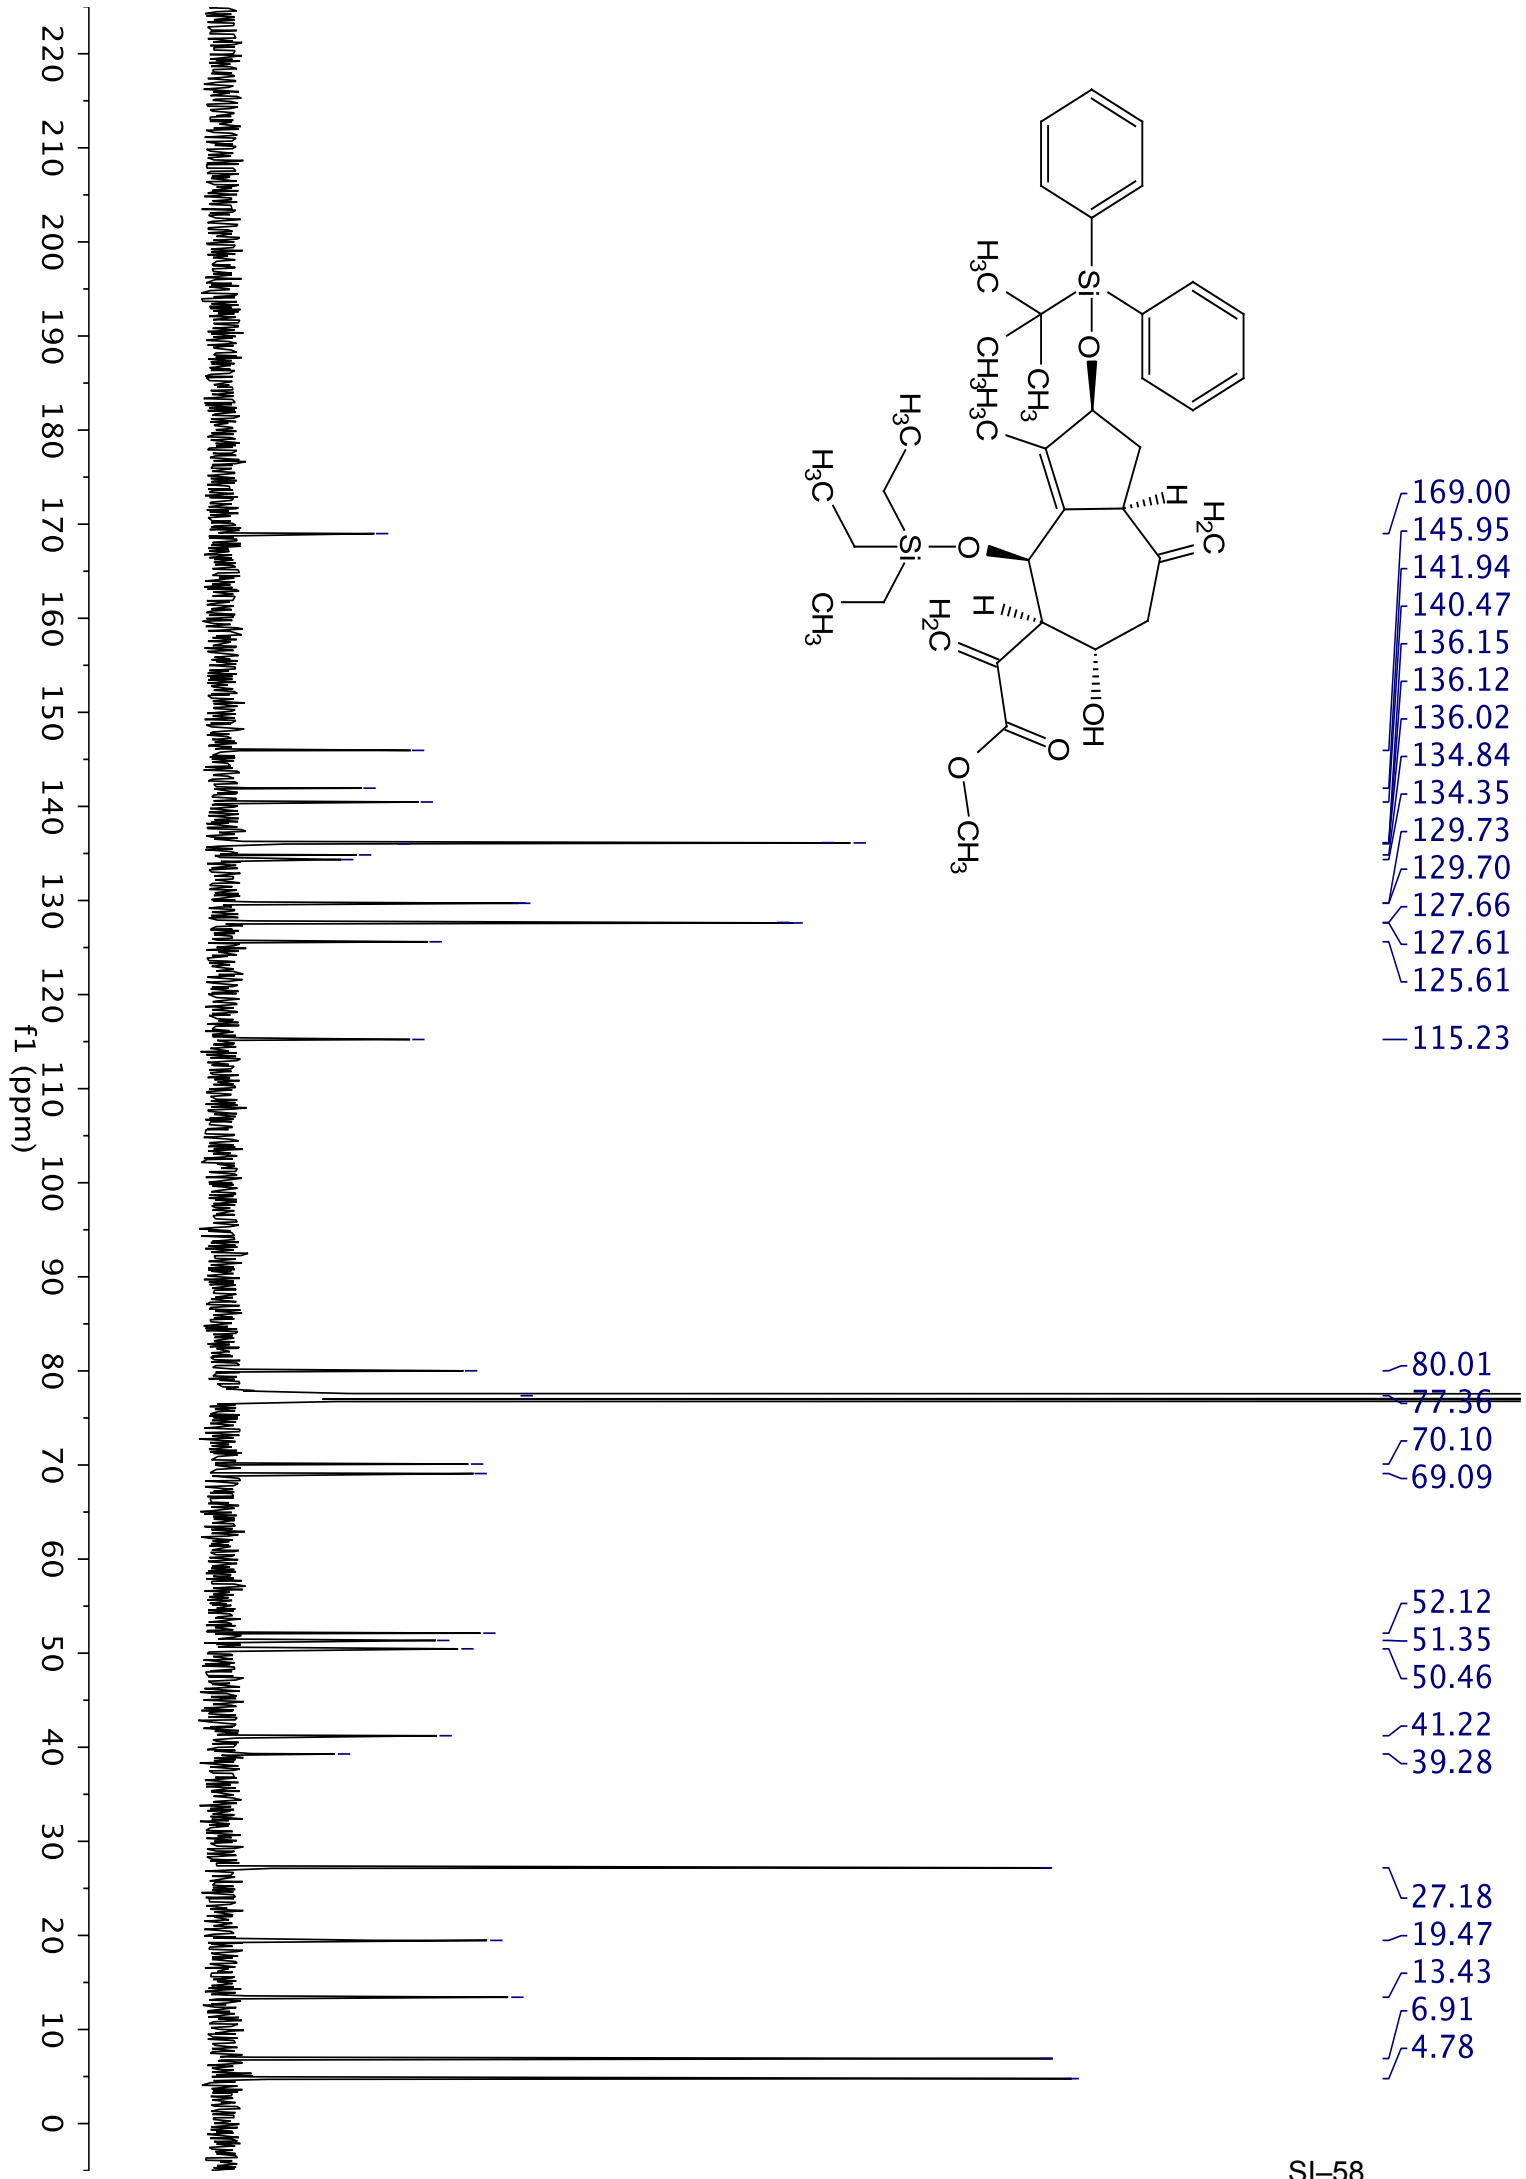

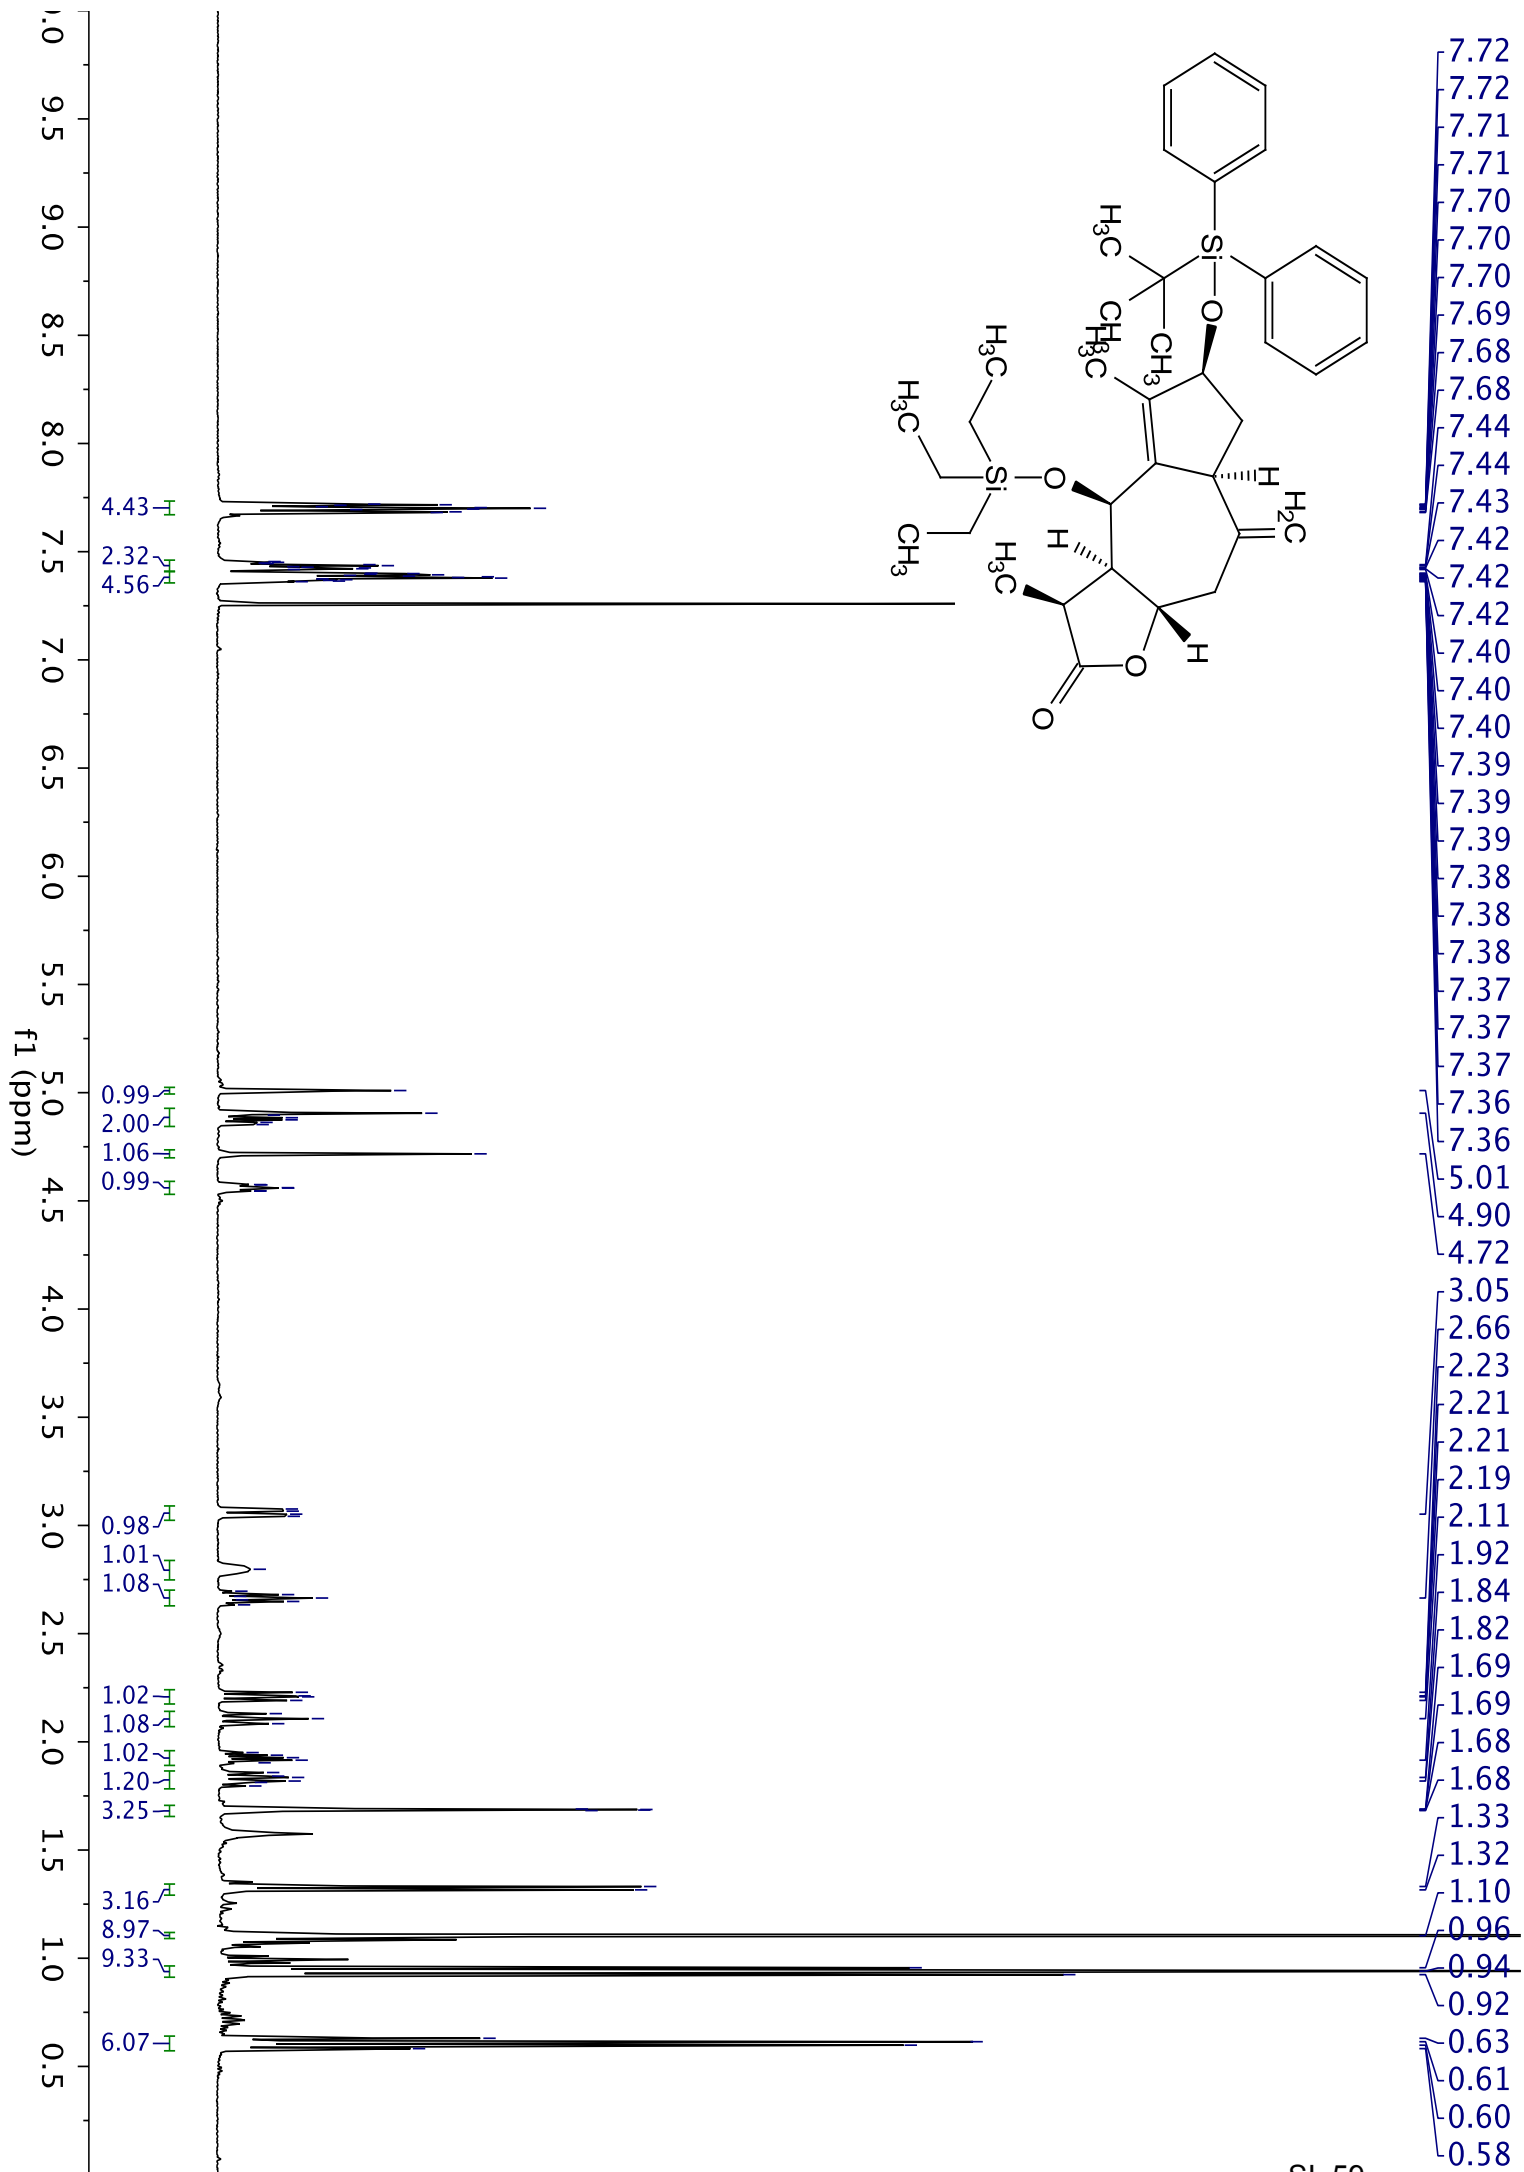

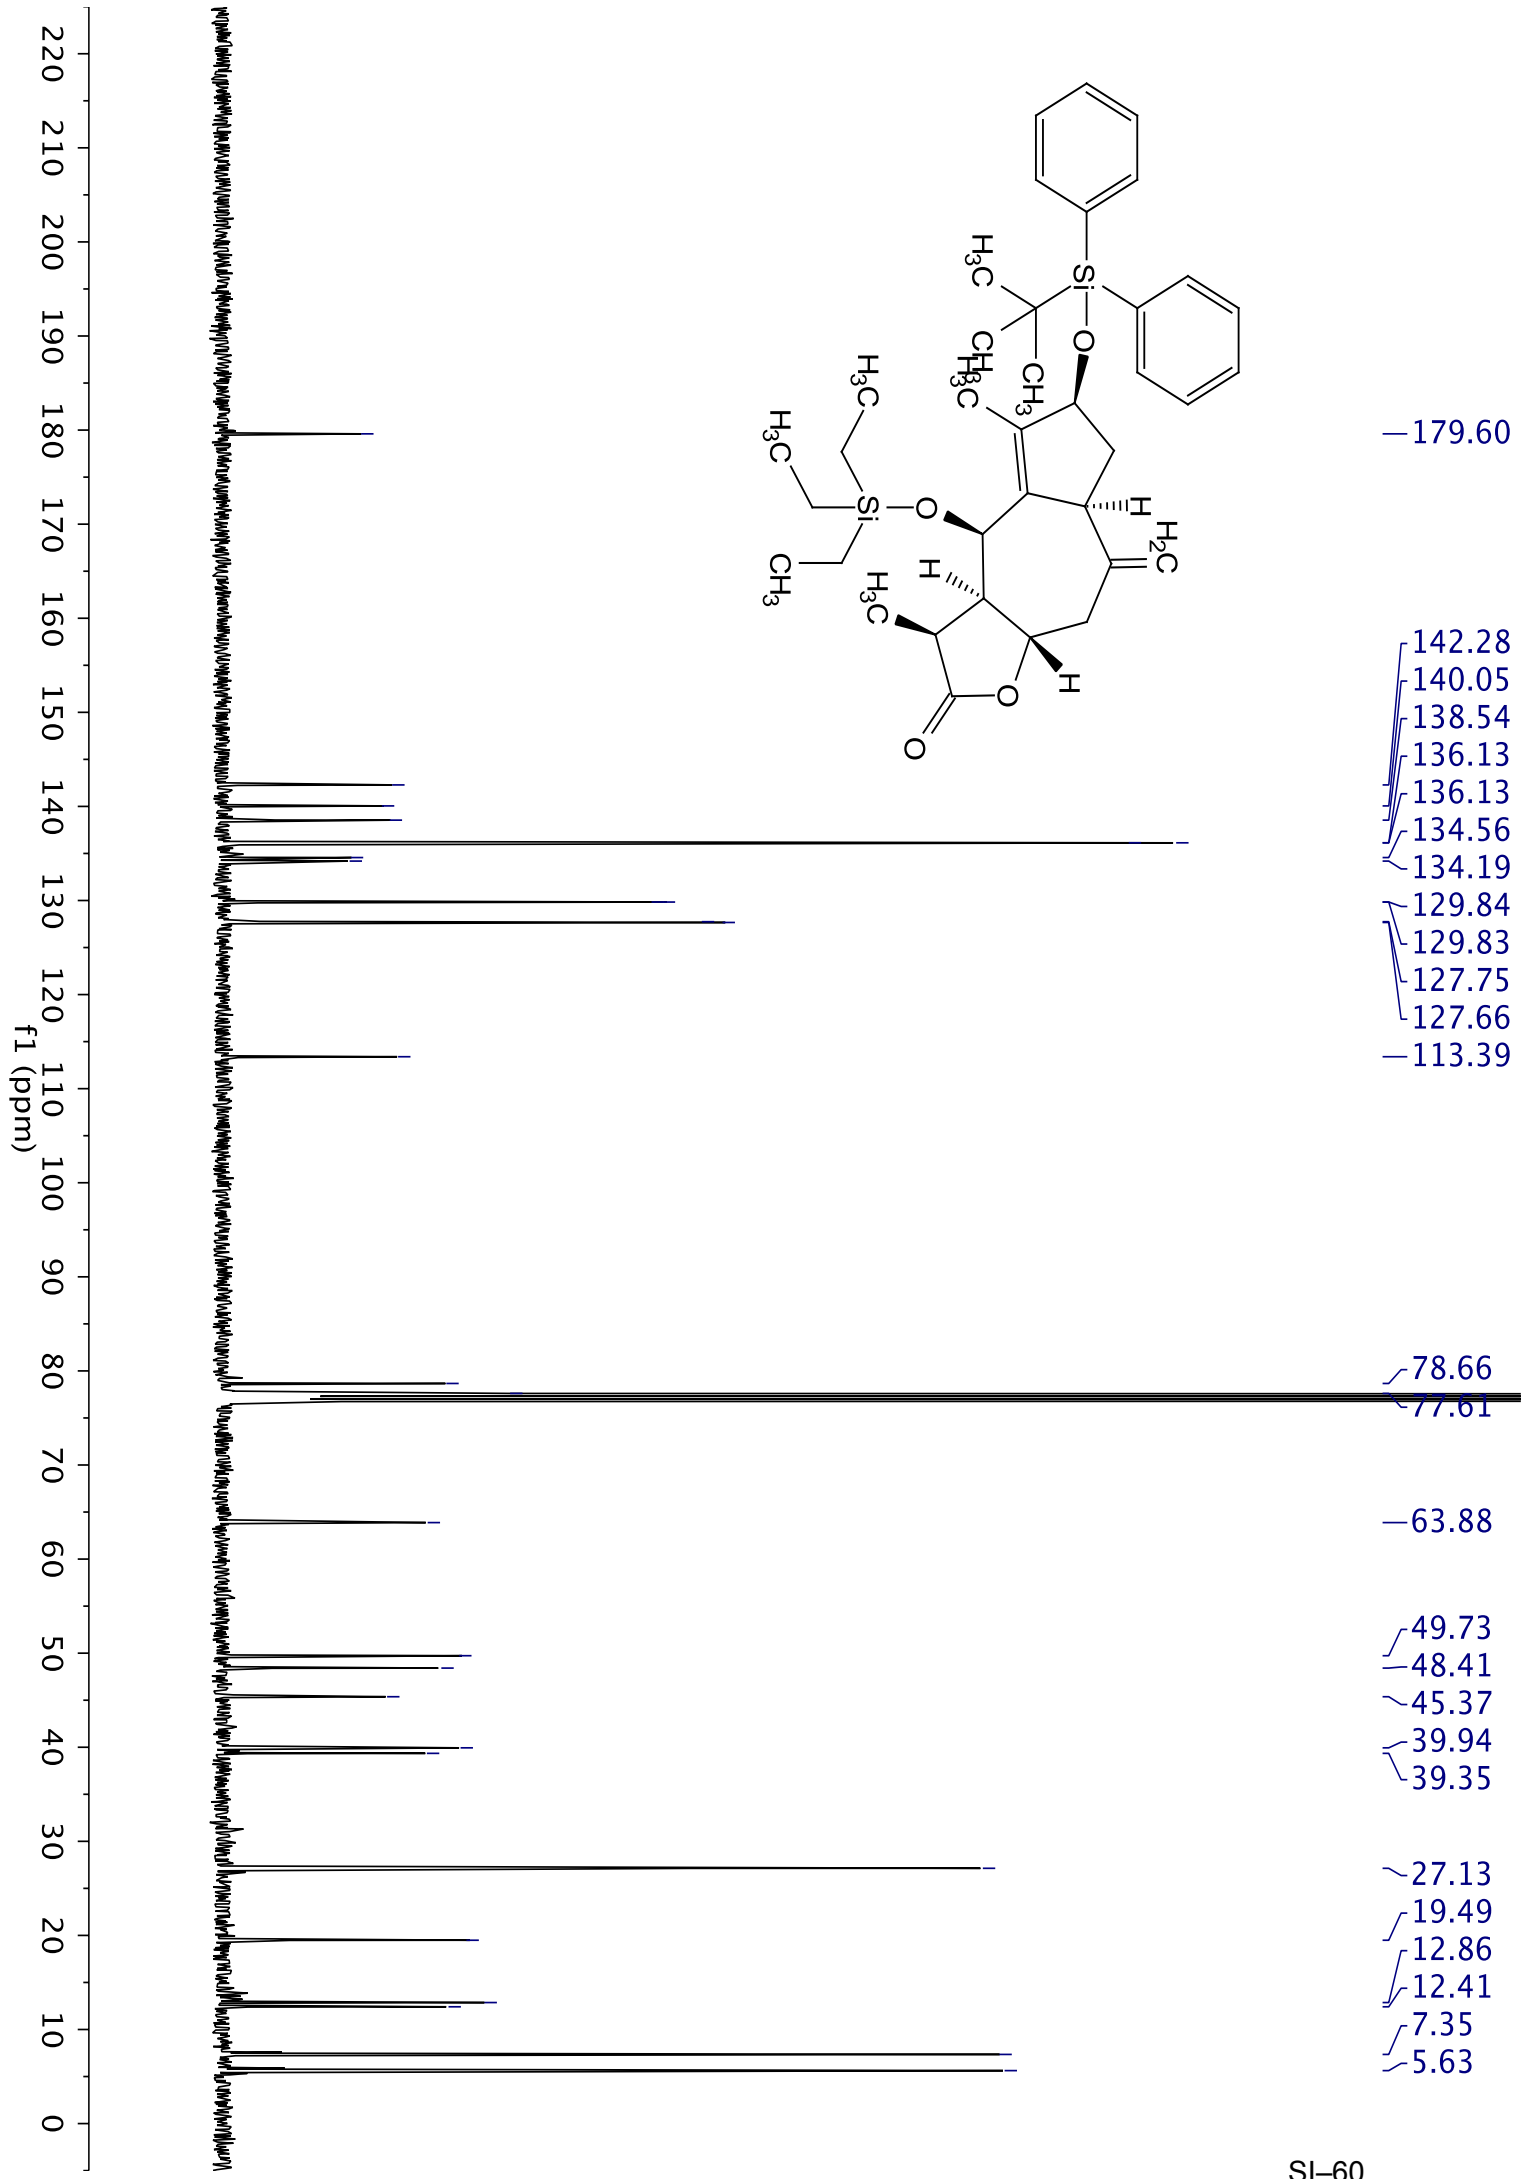

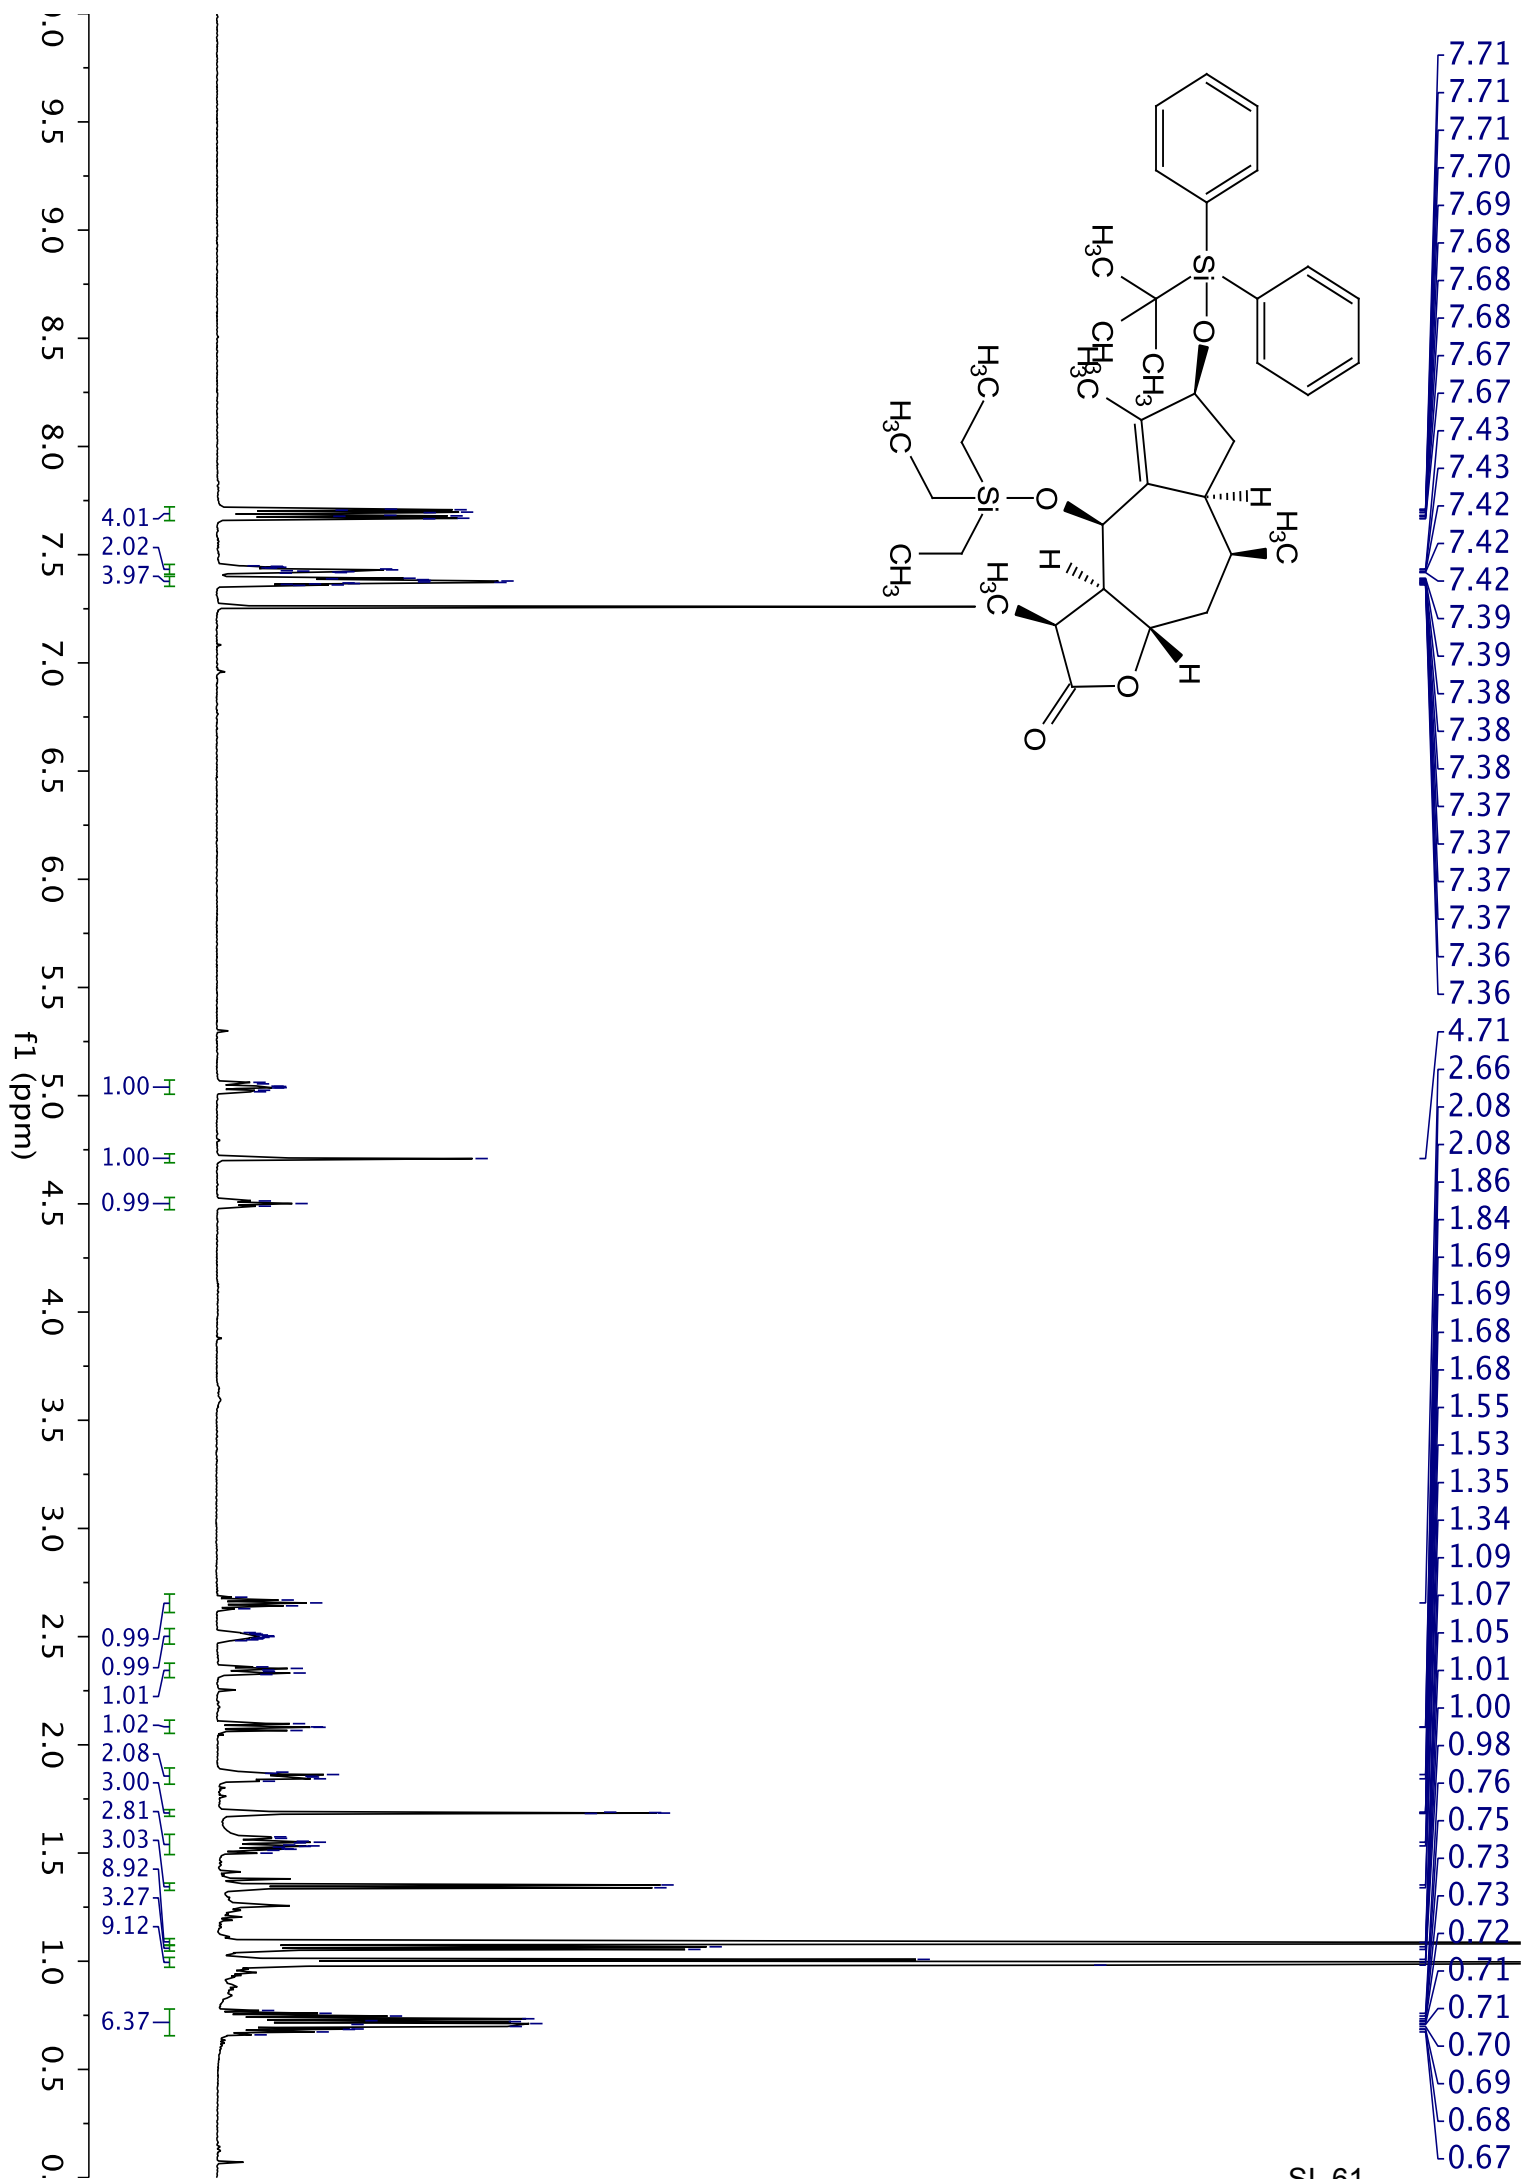

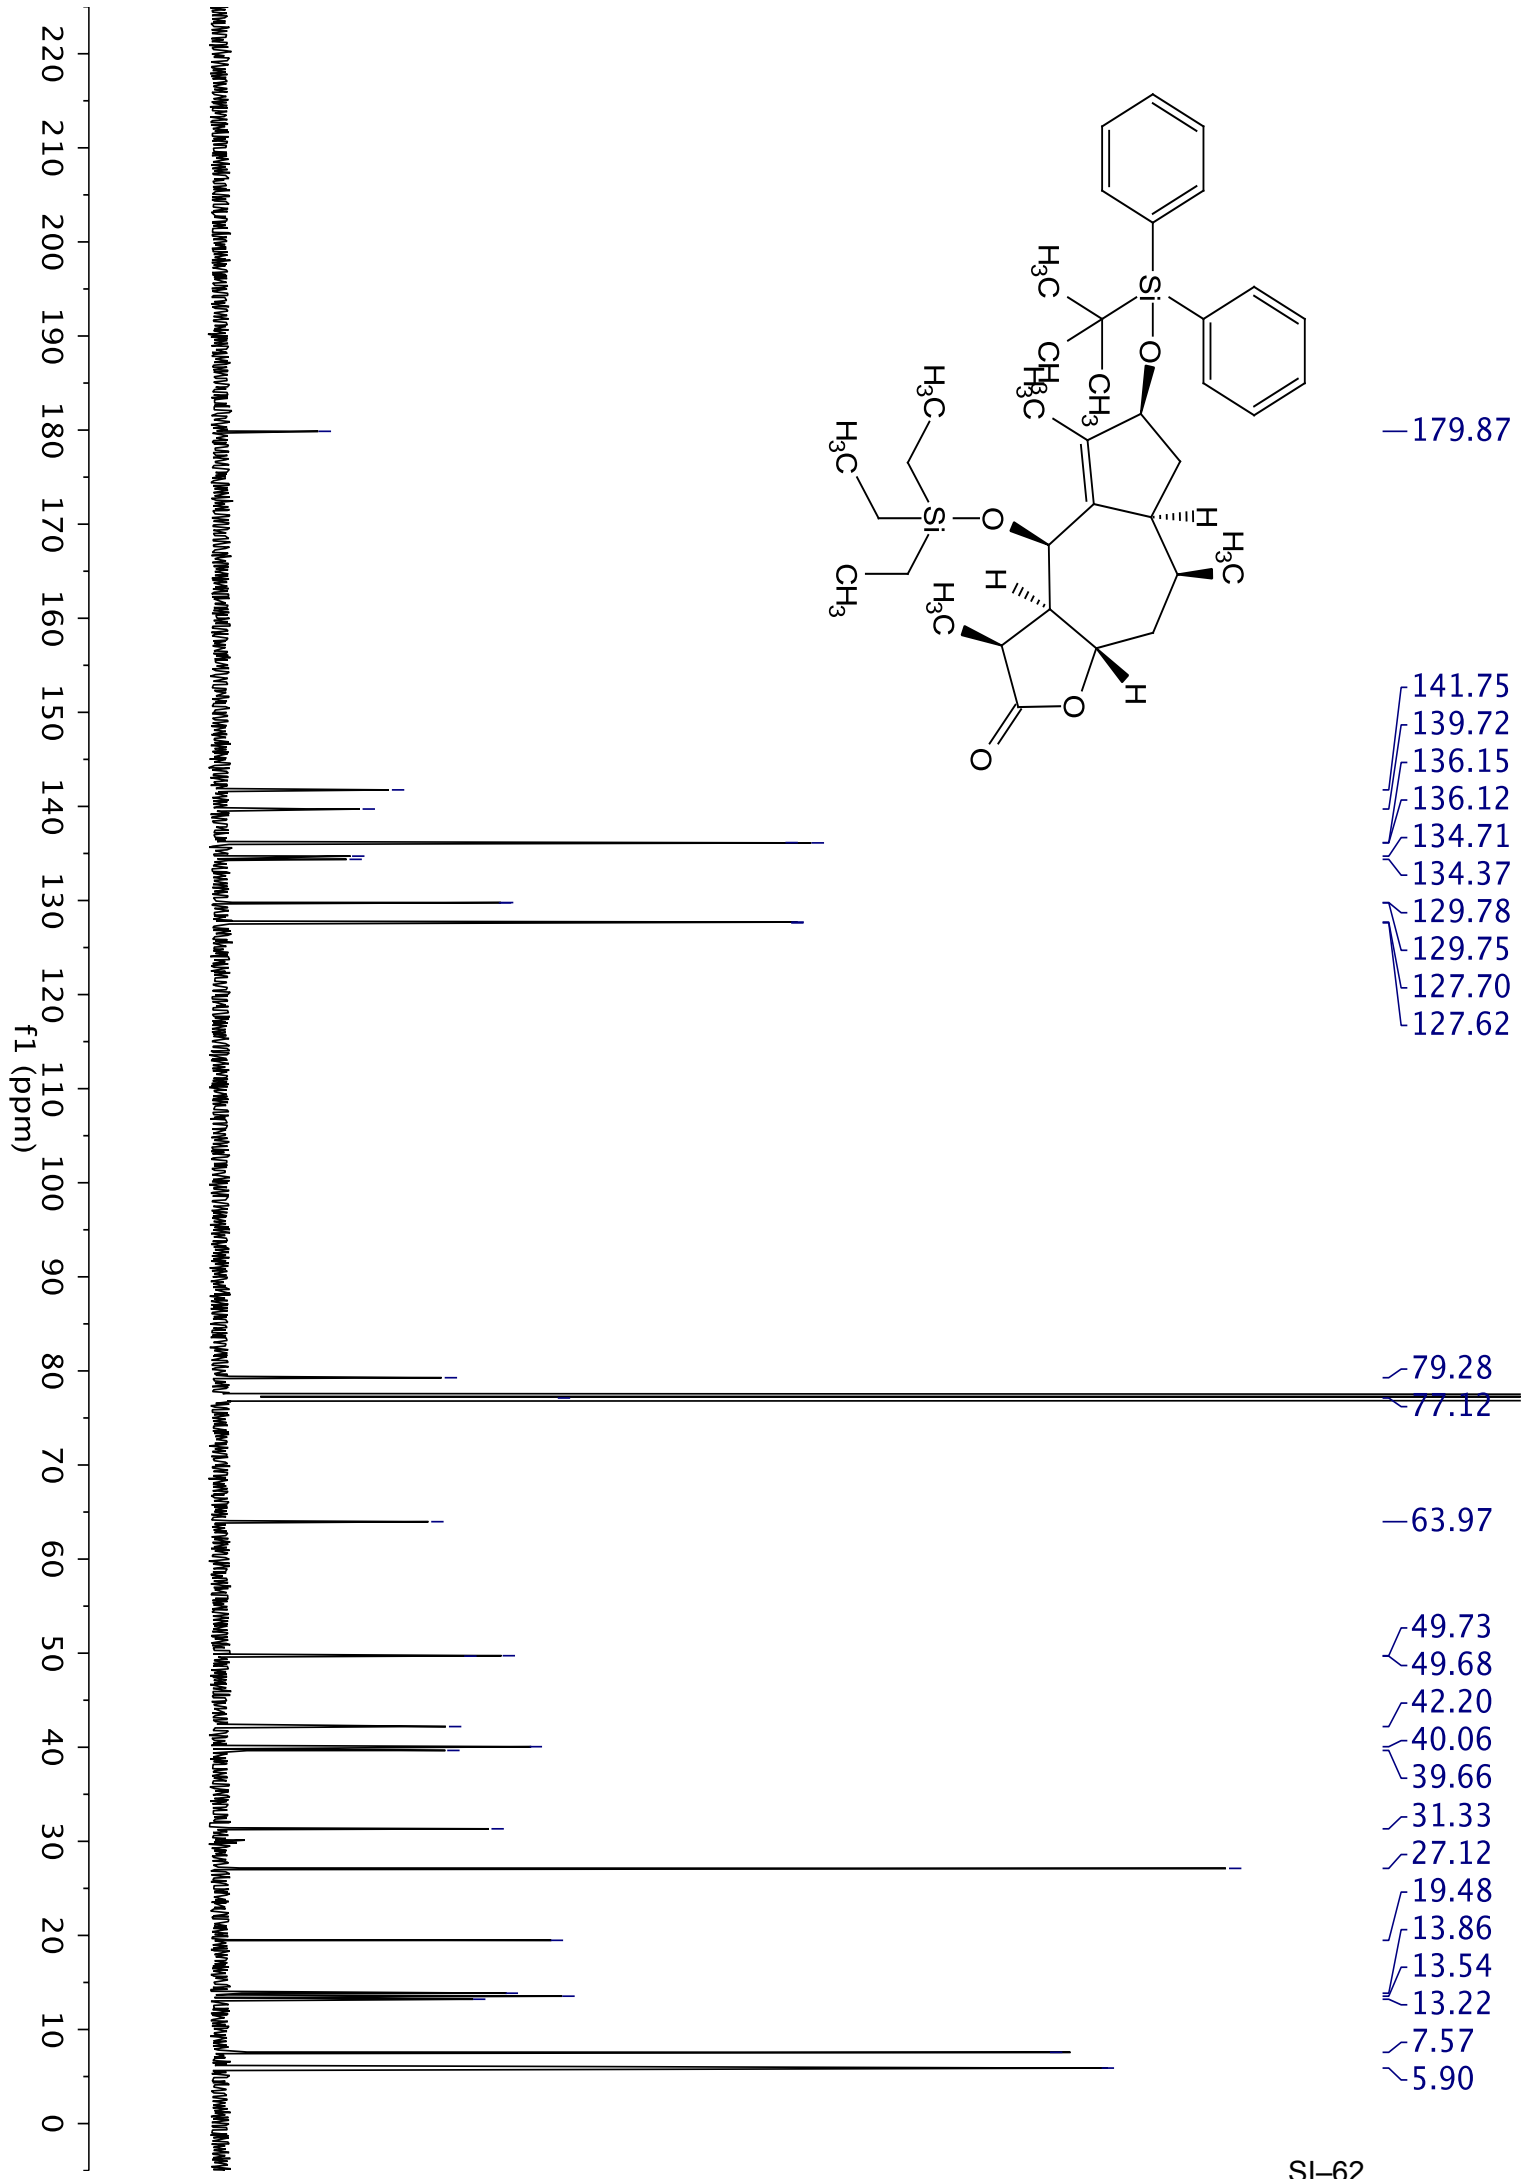

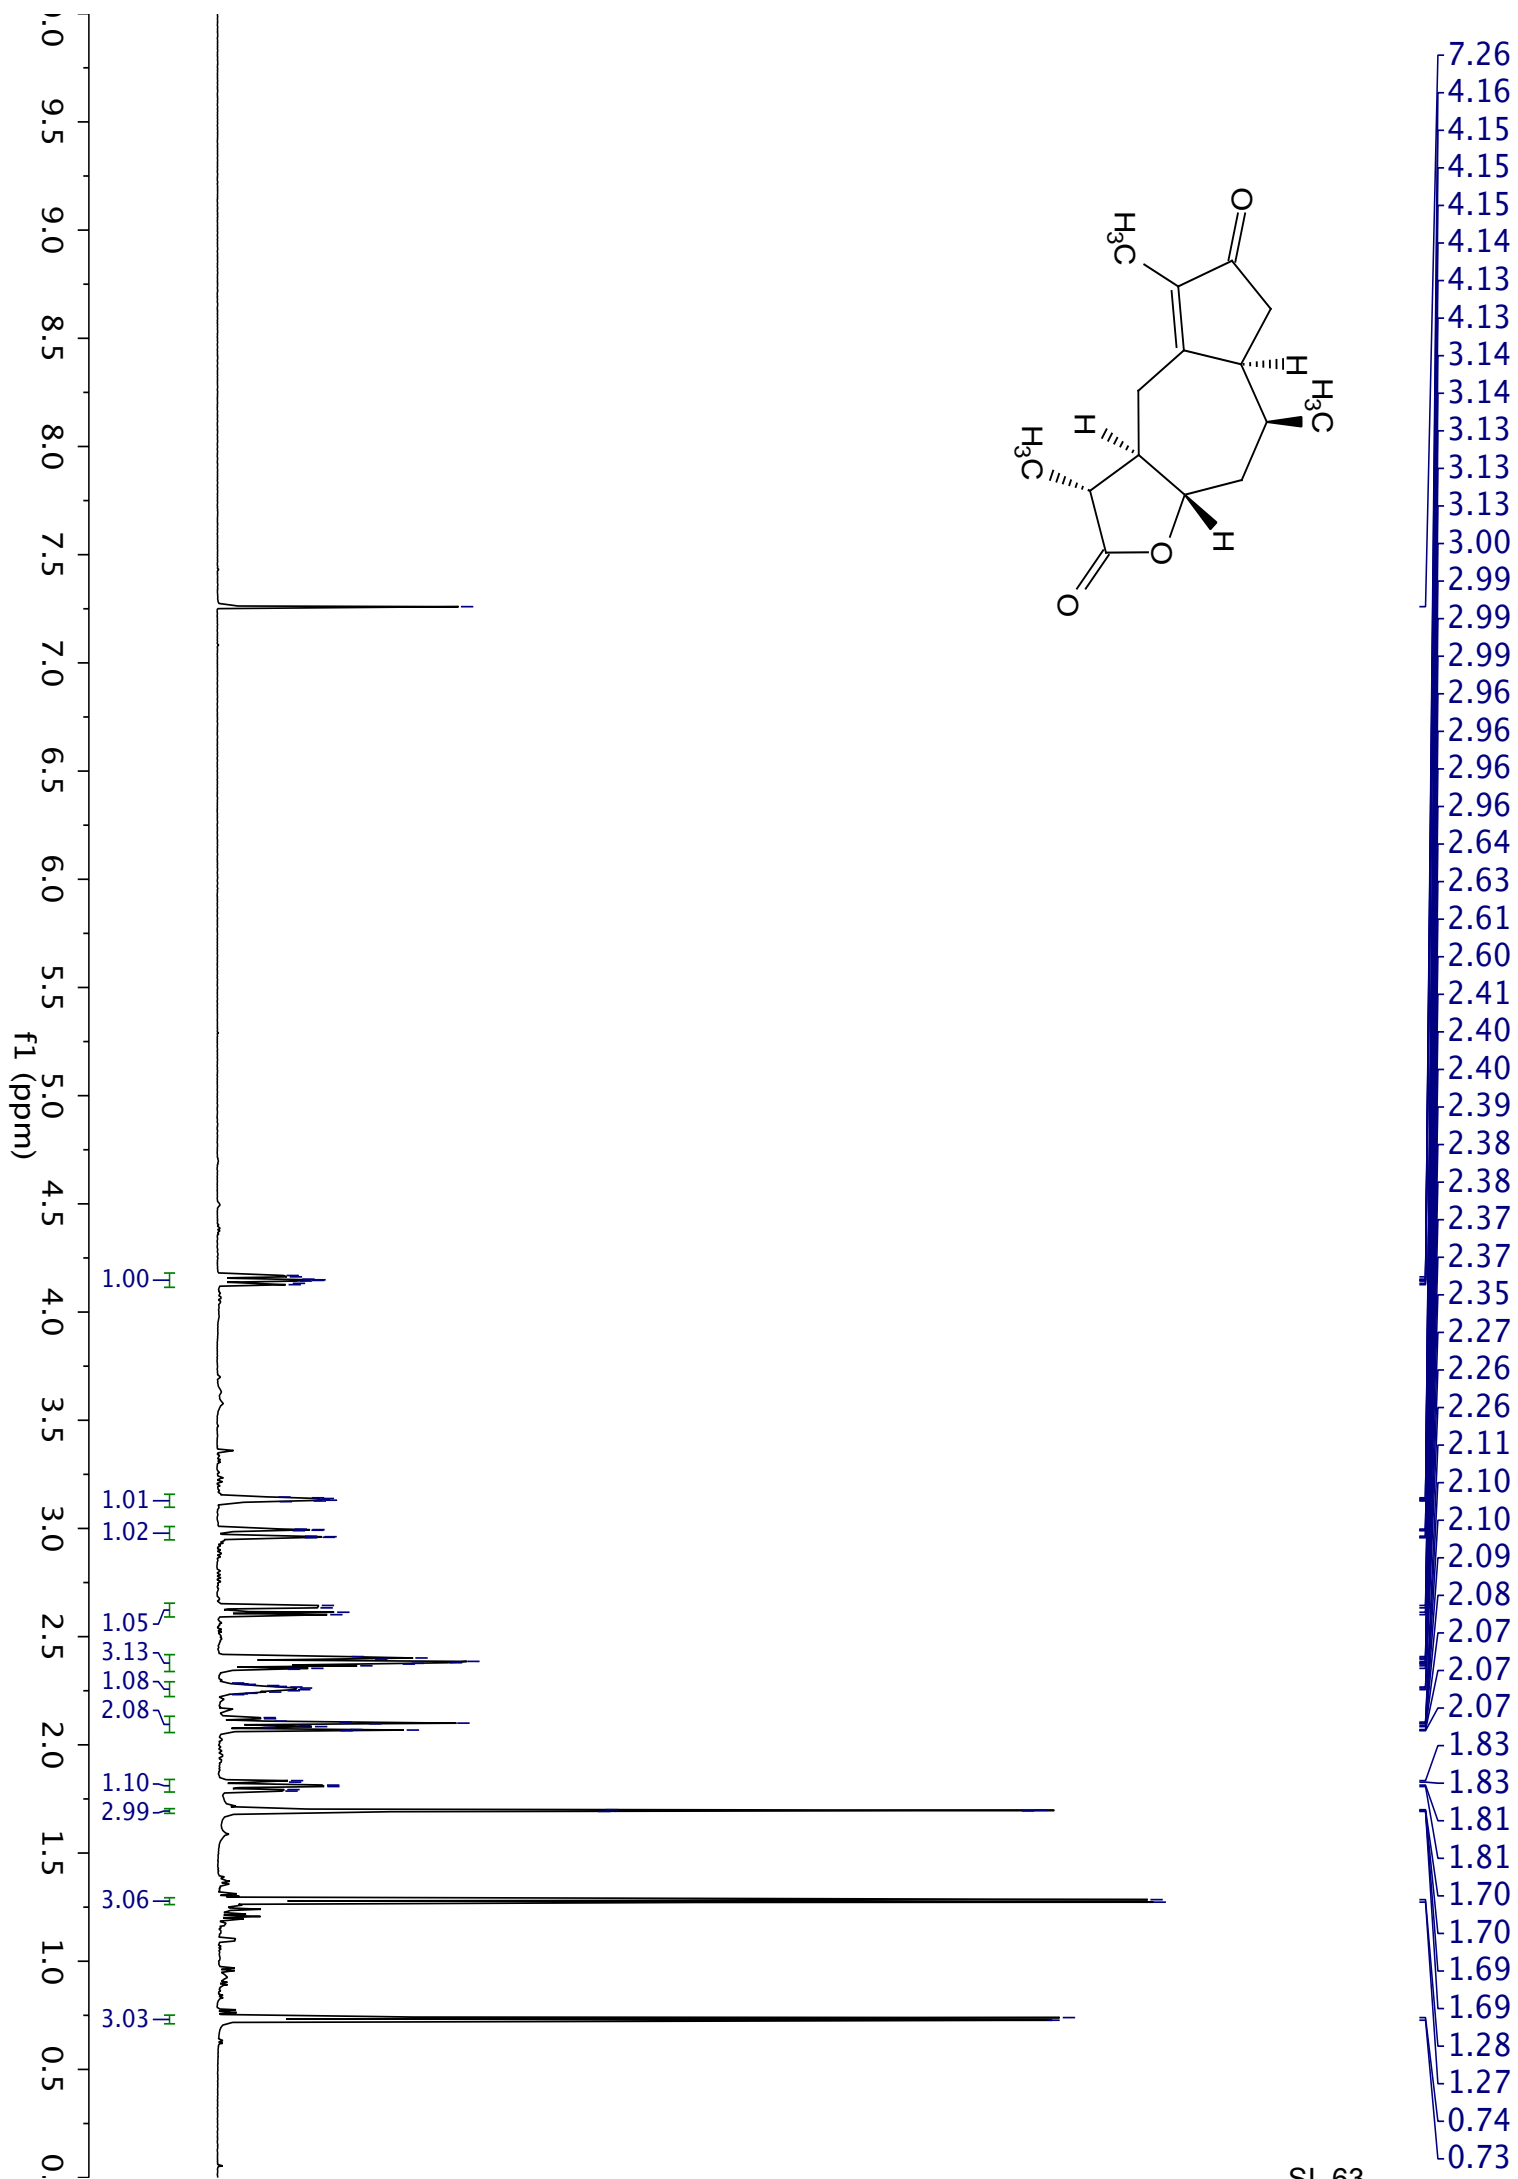

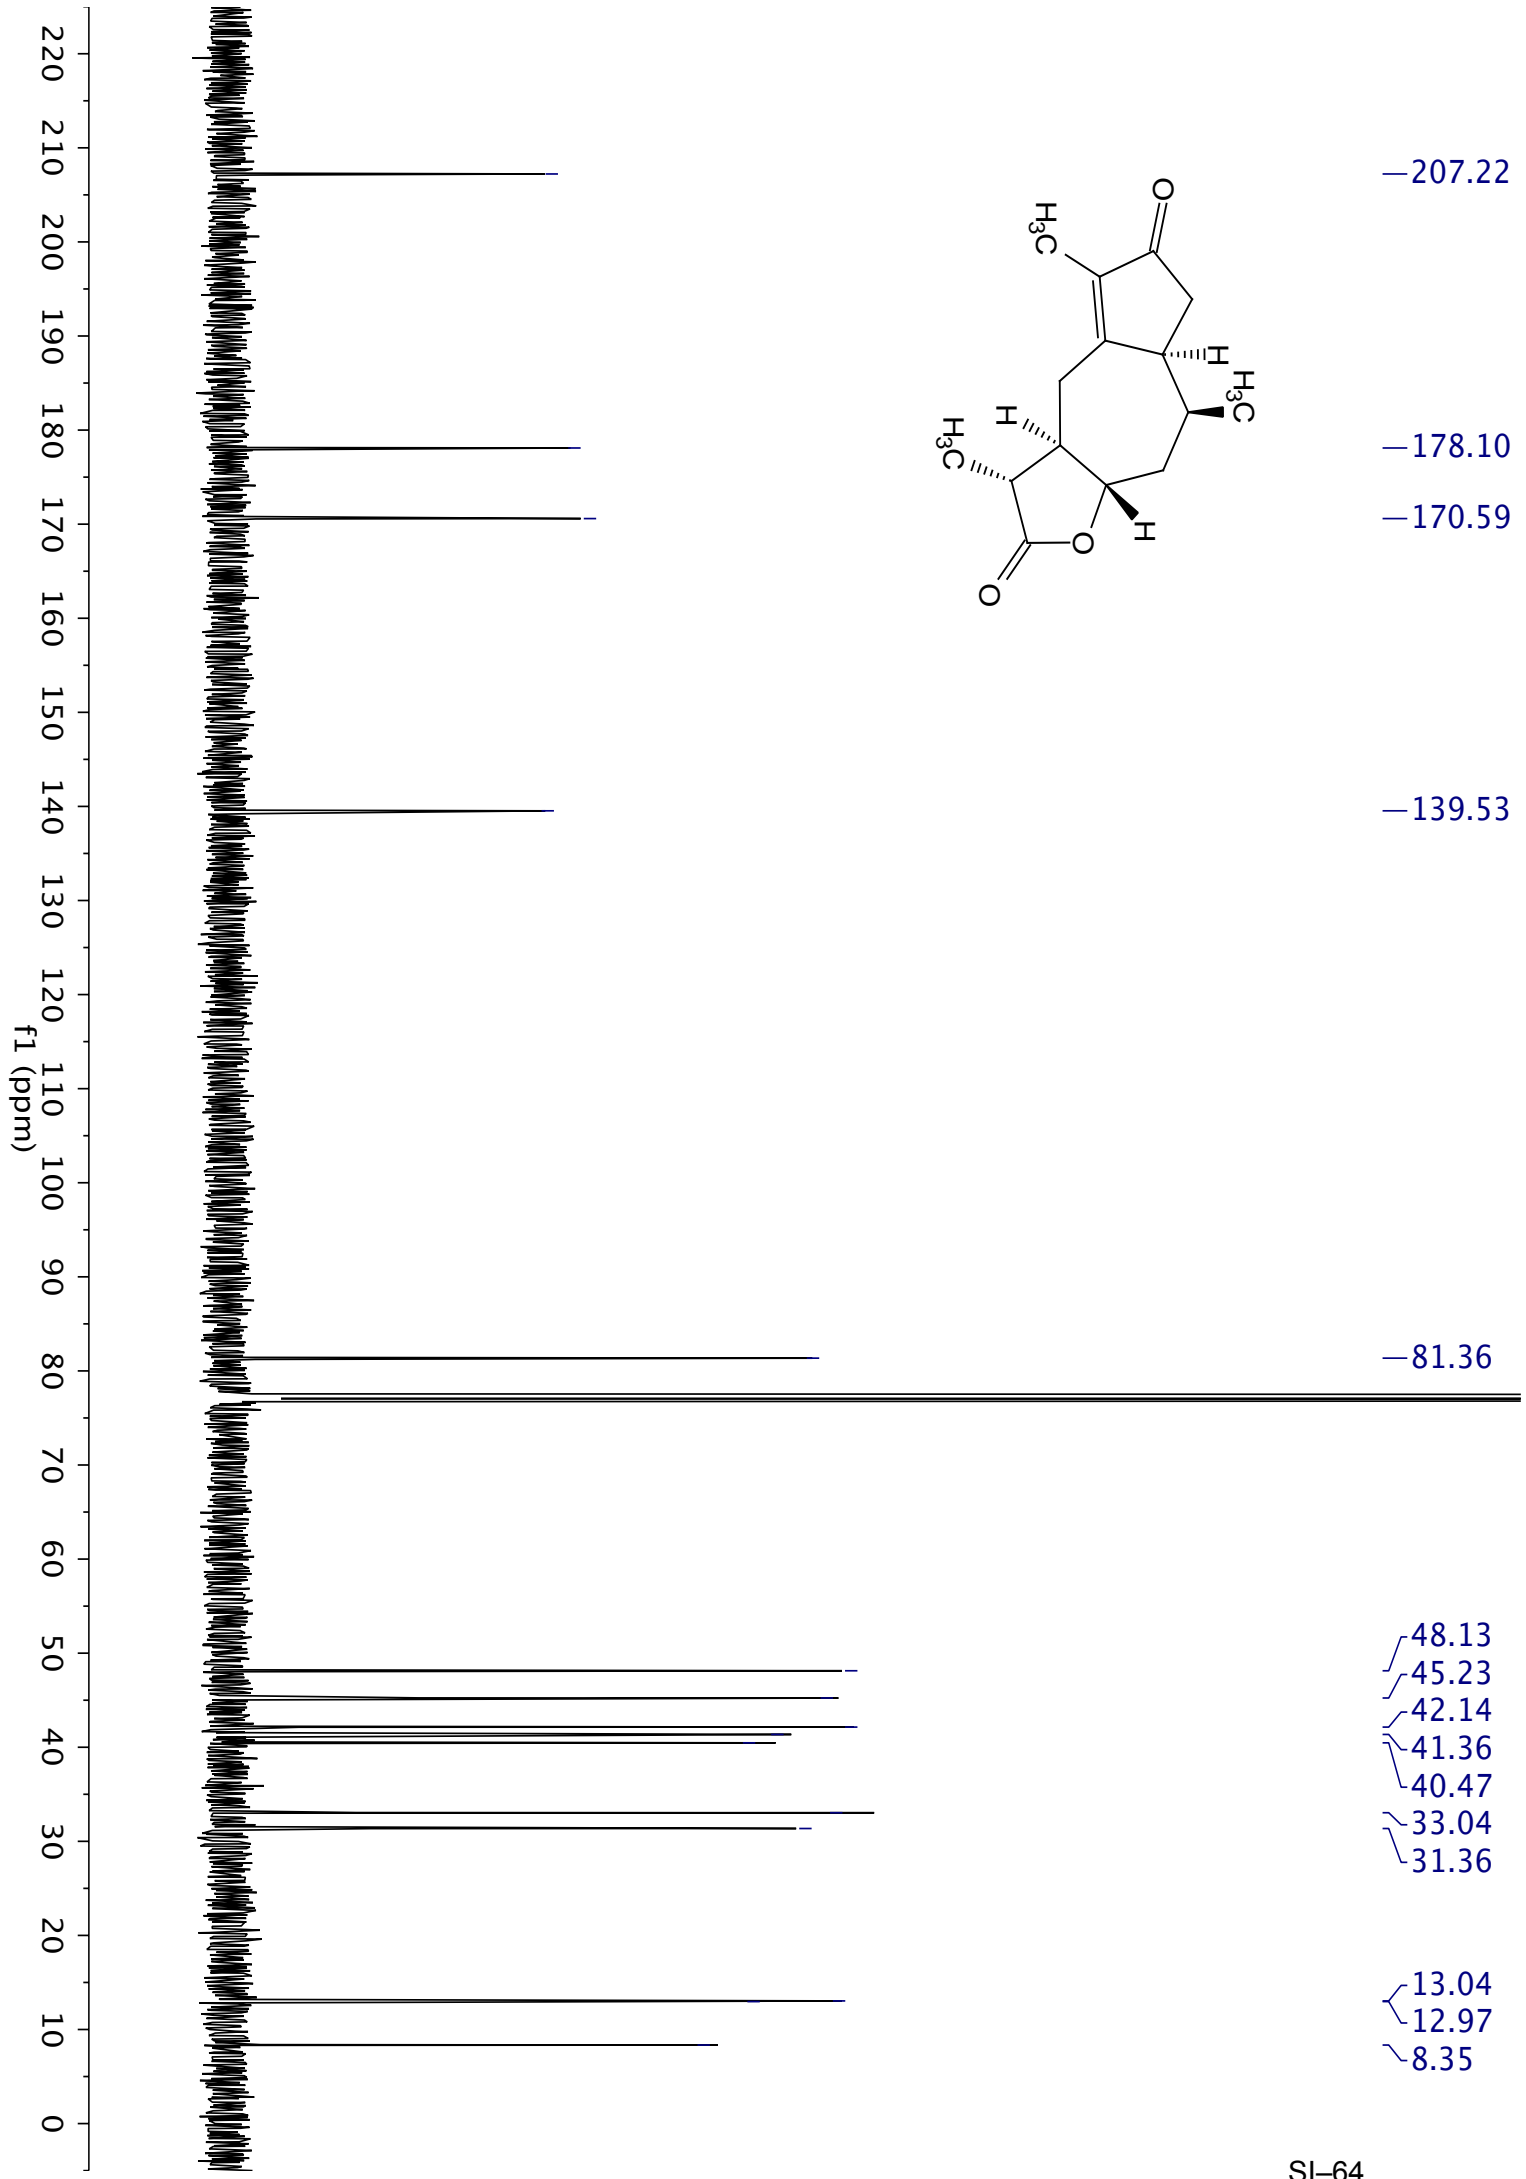

Supplement: NIHMS843135-supplement-Supporting_Information.pdf [file NIHMS843135-supplement-Supporting_Information.pdf]
